# Supplementary material
Source: publisher site journal article supplement (https://static.cambridge.org/content/id/urn%3Acambridge.org%3Aid%3Aarticle%3AS001667230050072X/resource/name/S001667230050072Xsupp001.zip)
Supplement: Supplementary file 1 [file S001667230050072Xsupp001.zip]

| Supplementary Data 1-1: SEER data baseline characteristics of patient with prostate cancer |                  |                 |        |                  |                 |        |                       |                 |       |
|--------------------------------------------------------------------------------------------|------------------|-----------------|--------|------------------|-----------------|--------|-----------------------|-----------------|-------|
| SEER data baseline characteristics of patient with prostate cancer                         |                  |                 |        |                  |                 |        |                       |                 |       |
|                                                                                            | The total cohort |                 |        | The train cohort |                 |        | The validation cohort |                 |       |
|                                                                                            |                  | Bone metastases |        |                  | Bone metastases |        |                       | Bone metastases |       |
|                                                                                            | Total            | Yes             | No     | Total            | Yes             | No     | Total                 | Yes             | No    |
| Age                                                                                        |                  |                 |        |                  |                 |        |                       |                 |       |
| Median                                                                                     | 66               | 71              | 66     | 66               | 71              | 66     | 66                    | 71              | 66    |
| Range                                                                                      | 20-106           | 35-99           | 20-106 | 20-106           | 35-99           | 20-106 | 31-99                 | 39-98           | 31-99 |
| PSA(ng/ml)                                                                                 |                  |                 |        |                  |                 |        |                       |                 |       |
| Mean                                                                                       | 21.65            | 63.4            | 21.05  | 21.65            | 63.07           | 21.06  | 21.63                 | 64.14           | 21.01 |
| Primary gleason grade                                                                      |                  |                 |        |                  |                 |        |                       |                 |       |
| 1                                                                                          | 246              | 0               | 246    | 186              | 0               | 186    | 60                    | 0               | 60    |
| 2                                                                                          | 2882             | 10              | 2872   | 2002             | 4               | 1998   | 880                   | 6               | 874   |
| 3                                                                                          | 211535           | 786             | 210749 | 148082           | 555             | 147527 | 63453                 | 231             | 63222 |
| 4                                                                                          | 59926            | 2385            | 57541  | 42012            | 1656            | 40356  | 17914                 | 729             | 17185 |
| 5                                                                                          | 6961             | 804             | 6157   | 4808             | 543             | 4265   | 2153                  | 261             | 1892  |
| Secondary gleason grade                                                                    |                  |                 |        |                  |                 |        |                       |                 |       |
| 1                                                                                          | 117              | 0               | 117    | 81               | 0               | 81     | 36                    | 0               | 36    |
| 2                                                                                          | 3266             | 4               | 3262   | 2319             | 1               | 2318   | 947                   | 3               | 944   |
| 3                                                                                          | 160840           | 836             | 160004 | 112452           | 589             | 111863 | 48388                 | 247             | 48141 |
| 4                                                                                          | 100552           | 1686            | 98866  | 70533            | 1165            | 69368  | 30019                 | 521             | 29498 |
| 5                                                                                          | 16775            | 1459            | 15316  | 11705            | 1003            | 10702  | 5070                  | 456             | 4614  |
| T stage                                                                                    |                  |                 |        |                  |                 |        |                       |                 |       |
| T1                                                                                         | 106325           | 1228            | 105097 | 74387            | 846             | 73541  | 31938                 | 382             | 31556 |
| T2                                                                                         | 149834           | 1743            | 148091 | 104967           | 1229            | 103738 | 44867                 | 514             | 44353 |
| T3                                                                                         | 22598            | 478             | 22120  | 15820            | 337             | 15483  | 6778                  | 141             | 6637  |
| T4                                                                                         | 2793             | 536             | 2257   | 1916             | 346             | 1570   | 877                   | 190             | 687   |
| N stage                                                                                    |                  |                 |        |                  |                 |        |                       |                 |       |
| N0                                                                                         | 276818           | 3139            | 273679 | 193743           | 2187            | 191556 | 83075                 | 952             | 82123 |
| N1                                                                                         | 4732             | 846             | 3886   | 3347             | 571             | 2776   | 1385                  | 275             | 1110  |
| Bone mets                                                                                  |                  |                 |        |                  |                 |        |                       |                 |       |
| Yes                                                                                        | 3985             | 3985            | 0      | 2758             | 2758            | 0      | 1227                  | 1227            | 0     |
| No                                                                                         | 277565           | 0               | 277565 | 194332           | 0               | 194332 | 83233                 | 0               | 83233 |

**Supplementary Data 1-2:trian group roc and validation roc, Delong's test**

data: trian group roc and validation roc, Delong's test

D = -0.76576, df = 160270, p-value = 0.4438

alternative hypothesis: true difference in AUC is not equal to 0

sample estimates:

AUC of training group data

89.96380      90.38788

AUC of validation group  
data

| Supplementary Data 1-3:clinical features of TCGA samples and predictive results |              |                 |                   |       |         |         |     |                                |                         |                          |
|---------------------------------------------------------------------------------|--------------|-----------------|-------------------|-------|---------|---------|-----|--------------------------------|-------------------------|--------------------------|
|                                                                                 | ID           | primary_gleason | secondary_gleason | PSA   | N_stage | T_stage | age | probability of bone metastasis | risk of bone metastasis | actually bone metastasis |
|                                                                                 | tcga-kk-a7b4 | 4               | 5                 | 0.6   | N1      | 3       | 65  | 0.092531                       | high_risk               | YES                      |
|                                                                                 | tcga-ch-5751 | 5               | 5                 | 0.01  | N1      | 4       | 68  | 0.278363                       | high_risk               | YES                      |
|                                                                                 | tcga-ej-5518 | 4               | 5                 | 0.1   | N0      | 4       | 67  | 0.027717                       | high_risk               | YES                      |
|                                                                                 | tcga-ej-5525 | 4               | 5                 | 3     | N0      | 2       | 67  | 0.02321                        | high_risk               | YES                      |
|                                                                                 | tcga-g9-a9s0 | 4               | 4                 | 10.87 | N1      | 3       | 54  | 0.051137                       | high_risk               | YES                      |
|                                                                                 | tcga-hi-7168 | 4               | 5                 | 0.3   | N0      | 3       | 63  | 0.023621                       | high_risk               | YES                      |
|                                                                                 | tcga-kk-a8i4 | 4               | 3                 | 0.2   | N1      | 3       | 65  | 0.022602                       | high_risk               | YES                      |
|                                                                                 | tcga-kk-a8ii | 4               | 5                 | 39.8  | N0      | 3       | 62  | 0.053847                       | high_risk               | YES                      |
|                                                                                 | tcga-vp-a878 | 4               | 5                 | 0.1   | N1      | 2       | 59  | 0.076885                       | high_risk               | YES                      |
|                                                                                 | tcga-yl-a9wy | 5               | 4                 | 1.8   | N1      | 3       | 58  | 0.131496                       | high_risk               | YES                      |
|                                                                                 | tcga-ch-5753 | 4               | 5                 | 4.53  | N1      | 3       | 71  | 0.106369                       | high_risk               | NO                       |
|                                                                                 | tcga-c       | 4               | 5                 | 0.    | N0      | 3       | 6   | 0.023747                       | high_risk               | NO                       |

|  |                      |   |   |               |    |   |        |          |           |    |
|--|----------------------|---|---|---------------|----|---|--------|----------|-----------|----|
|  | h-577<br>2           |   |   | 03            |    |   | 4      |          |           |    |
|  | tcga-e<br>j-a65j     | 4 | 5 | 0.<br>1       | N0 | 3 | 6<br>3 | 0.02352  | high_risk | NO |
|  | tcga-h<br>c-782<br>1 | 4 | 4 | 0.<br>01      | N1 | 3 | 5<br>5 | 0.041183 | high_risk | NO |
|  | tcga-k<br>k-a7b<br>3 | 4 | 5 | 0.<br>1       | N0 | 3 | 6<br>3 | 0.02352  | high_risk | NO |
|  | tcga-2<br>a-a8vt     | 4 | 5 | 0.<br>05      | N1 | 4 | 4<br>8 | 0.085776 | high_risk | NO |
|  | tcga-2<br>a-a8w<br>3 | 4 | 5 | 0.<br>36      | N0 | 3 | 7<br>0 | 0.025568 | high_risk | NO |
|  | tcga-c<br>h-574<br>1 | 4 | 5 | 0.<br>02      | N1 | 3 | 5<br>7 | 0.084158 | high_risk | NO |
|  | tcga-c<br>h-575<br>4 | 4 | 5 | 37<br>.3<br>6 | N1 | 3 | 6<br>5 | 0.185979 | high_risk | NO |
|  | tcga-c<br>h-576<br>1 | 5 | 4 | 8.<br>49      | N0 | 3 | 6<br>1 | 0.042454 | high_risk | NO |
|  | tcga-c<br>h-576<br>6 | 4 | 3 | 13<br>.9      | N1 | 3 | 5<br>6 | 0.027414 | high_risk | NO |
|  | tcga-c<br>h-576<br>9 | 5 | 4 | 11<br>.1<br>6 | N0 | 3 | 4<br>9 | 0.03938  | high_risk | NO |
|  | tcga-c<br>h-578<br>8 | 4 | 3 | 3.<br>58      | N1 | 3 | 6<br>9 | 0.025406 | high_risk | NO |
|  | tcga-c<br>h-579<br>2 | 4 | 5 | 11<br>.4<br>9 | N0 | 3 | 5<br>8 | 0.028382 | high_risk | NO |
|  | tcga-e<br>j-5495     | 5 | 3 | 0.<br>13      | N1 | 3 | 6<br>8 | 0.072574 | high_risk | NO |
|  | tcga-e<br>j-5504     | 4 | 3 | 1             | N1 | 3 | 6<br>6 | 0.023251 | high_risk | NO |
|  | tcga-e<br>j-5506     | 5 | 3 | 0.<br>1       | N1 | 3 | 6<br>7 | 0.071766 | high_risk | NO |
|  | tcga-e<br>j-5507     | 4 | 5 | 0.<br>1       | N1 | 3 | 5<br>4 | 0.081688 | high_risk | NO |

|                      |   |   |               |    |   |        |          |           |    |
|----------------------|---|---|---------------|----|---|--------|----------|-----------|----|
| tcga-e<br>j-5514     | 4 | 5 | 0.<br>1       | N0 | 2 | 6<br>6 | 0.021568 | high_risk | NO |
| tcga-e<br>j-5519     | 4 | 4 | 0.<br>2       | N1 | 3 | 6<br>5 | 0.046116 | high_risk | NO |
| tcga-e<br>j-5524     | 4 | 5 | 0.<br>1       | N0 | 3 | 5<br>7 | 0.021997 | high_risk | NO |
| tcga-e<br>j-5526     | 4 | 4 | 0.<br>1       | N1 | 3 | 5<br>6 | 0.041715 | high_risk | NO |
| tcga-e<br>j-8469     | 4 | 5 | 3.<br>1       | N0 | 3 | 4<br>7 | 0.020982 | high_risk | NO |
| tcga-e<br>j-a46f     | 4 | 4 | 19<br>.8      | N1 | 3 | 5<br>8 | 0.064217 | high_risk | NO |
| tcga-e<br>j-a65b     | 4 | 5 | 0.<br>01      | N0 | 3 | 5<br>5 | 0.02147  | high_risk | NO |
| tcga-e<br>j-a65f     | 4 | 5 | 0.<br>8       | N0 | 3 | 5<br>9 | 0.022834 | high_risk | NO |
| tcga-e<br>j-a6ra     | 4 | 4 | 0.<br>65<br>2 | N1 | 3 | 7<br>0 | 0.049154 | high_risk | NO |
| tcga-e<br>j-a7n<br>m | 4 | 5 | 0.<br>1       | N1 | 3 | 6<br>5 | 0.091614 | high_risk | NO |
| tcga-e<br>j-a7nn     | 4 | 3 | 0.<br>3       | N1 | 3 | 6<br>2 | 0.021905 | high_risk | NO |
| tcga-fc<br>-a5ob     | 4 | 5 | 5.<br>22      | N0 | 3 | 5<br>3 | 0.023479 | high_risk | NO |
| tcga-g<br>9-635<br>6 | 4 | 5 | 0.<br>13      | N0 | 3 | 6<br>0 | 0.02276  | high_risk | NO |
| tcga-g<br>9-636<br>7 | 4 | 5 | 0.<br>42      | N0 | 3 | 6<br>1 | 0.023159 | high_risk | NO |
| tcga-g<br>9-649<br>9 | 4 | 5 | 0.<br>11      | N0 | 3 | 6<br>7 | 0.024596 | high_risk | NO |
| tcga-g<br>9-752<br>1 | 4 | 4 | 0.<br>06      | N1 | 3 | 5<br>3 | 0.040333 | high_risk | NO |
| tcga-g<br>9-752<br>3 | 5 | 5 | 0.<br>03      | N0 | 3 | 4<br>5 | 0.060271 | high_risk | NO |
| tcga-g<br>9-a9s4     | 4 | 4 | 0.<br>03      | N1 | 3 | 6<br>2 | 0.044474 | high_risk | NO |
| tcga-h               | 4 | 5 | 4.            | N0 | 3 | 5      | 0.023174 | high_risk | NO |

|              |   |   |       |    |   |    |          |           |    |
|--------------|---|---|-------|----|---|----|----------|-----------|----|
| c-7213       |   |   | 09    |    |   | 4  |          |           |    |
| tcga-hc-a8cy | 5 | 4 | 0.9   | N1 | 3 | 63 | 0.135816 | high_risk | NO |
| tcga-hc-a9te | 5 | 4 | 0.064 | N0 | 3 | 65 | 0.03714  | high_risk | NO |
| tcga-hc-a9th | 5 | 4 | 0.38  | N0 | 3 | 59 | 0.035001 | high_risk | NO |
| tcga-hi-7171 | 5 | 4 | 0.7   | N0 | 3 | 57 | 0.034471 | high_risk | NO |
| tcga-j4-aatz | 4 | 5 | 0     | N0 | 3 | 66 | 0.024267 | high_risk | NO |
| tcga-j9-a52b | 5 | 4 | 0.01  | N0 | 3 | 63 | 0.036291 | high_risk | NO |
| tcga-j9-a52e | 4 | 5 | 0.01  | N0 | 3 | 65 | 0.024003 | high_risk | NO |
| tcga-j9-a8cm | 5 | 4 | 0.55  | N1 | 3 | 66 | 0.138964 | high_risk | NO |
| tcga-kc-a4br | 4 | 5 | 0     | N1 | 3 | 76 | 0.10241  | high_risk | NO |
| tcga-kc-a4bv | 4 | 5 | 0.53  | N0 | 3 | 66 | 0.024544 | high_risk | NO |
| tcga-kk-a59v | 4 | 5 | 0.1   | N0 | 3 | 64 | 0.023783 | high_risk | NO |
| tcga-kk-a59y | 4 | 5 | 0.1   | N1 | 3 | 57 | 0.084293 | high_risk | NO |
| tcga-kk-a5a1 | 4 | 5 | 0.1   | N0 | 3 | 72 | 0.025998 | high_risk | NO |
| tcga-kk-a6e0 | 4 | 5 | 0.3   | N0 | 3 | 59 | 0.02259  | high_risk | NO |
| tcga-kk-a6e1 | 4 | 5 | 0.1   | N1 | 3 | 58 | 0.085178 | high_risk | NO |
| tcga-kk-a6e6 | 4 | 5 | 0.1   | N0 | 3 | 69 | 0.025145 | high_risk | NO |

|                      |   |   |          |    |   |        |          |           |    |
|----------------------|---|---|----------|----|---|--------|----------|-----------|----|
| tcga-k<br>k-a6e<br>7 | 5 | 4 | 0.<br>1  | N1 | 3 | 4<br>7 | 0.113986 | high_risk | NO |
| tcga-k<br>k-a6e<br>8 | 4 | 5 | 0.<br>1  | N0 | 2 | 6<br>9 | 0.022302 | high_risk | NO |
| tcga-k<br>k-a7a<br>u | 4 | 5 | 0        | N1 | 3 | 6<br>3 | 0.089553 | high_risk | NO |
| tcga-k<br>k-a7a<br>w | 4 | 3 | 0.<br>8  | N1 | 3 | 5<br>7 | 0.020939 | high_risk | NO |
| tcga-k<br>k-a7b<br>0 | 4 | 5 | 0.<br>1  | N0 | 3 | 6<br>8 | 0.024866 | high_risk | NO |
| tcga-k<br>k-a7b<br>2 | 4 | 5 | 0.<br>3  | N1 | 3 | 6<br>8 | 0.09488  | high_risk | NO |
| tcga-k<br>k-a8i7     | 4 | 5 | 0.<br>1  | N0 | 3 | 5<br>5 | 0.021511 | high_risk | NO |
| tcga-k<br>k-a8i8     | 4 | 5 | 0.<br>1  | N0 | 3 | 7<br>0 | 0.025426 | high_risk | NO |
| tcga-k<br>k-a8ia     | 4 | 5 | 0.<br>1  | N1 | 3 | 6<br>9 | 0.095485 | high_risk | NO |
| tcga-k<br>k-a8ic     | 4 | 5 | 0.<br>9  | N0 | 3 | 5<br>5 | 0.021884 | high_risk | NO |
| tcga-k<br>k-a8id     | 5 | 4 | 0.<br>1  | N1 | 3 | 7<br>1 | 0.144707 | high_risk | NO |
| tcga-k<br>k-a8ij     | 4 | 3 | 0.<br>1  | N1 | 3 | 6<br>0 | 0.021329 | high_risk | NO |
| tcga-k<br>k-a8ik     | 4 | 5 | 0        | N0 | 2 | 5<br>6 | 0.019245 | high_risk | NO |
| tcga-k<br>k-a8il     | 4 | 5 | 0.<br>1  | N1 | 3 | 6<br>5 | 0.091614 | high_risk | NO |
| tcga-<br>m7-a7<br>23 | 4 | 3 | 0.<br>1  | N1 | 3 | 5<br>5 | 0.02017  | high_risk | NO |
| tcga-<br>mg-aa<br>mc | 4 | 5 | 0.<br>01 | N0 | 3 | 6<br>0 | 0.022702 | high_risk | NO |
| tcga-v<br>1-a8w<br>v | 4 | 5 | 0.<br>01 | N1 | 3 | 5<br>3 | 0.080689 | high_risk | NO |
| tcga-v               | 4 | 5 | 0.       | N1 | 3 | 6      | 0.086826 | high_risk | NO |

|                      |   |   |               |    |   |        |          |           |    |
|----------------------|---|---|---------------|----|---|--------|----------|-----------|----|
| 1-a8w<br>w           |   |   | 01<br>5       |    |   | 0      |          |           |    |
| tcga-v<br>1-a9o<br>5 | 5 | 4 | 3.<br>26      | N1 | 4 | 6<br>5 | 0.160705 | high_risk | NO |
| tcga-v<br>1-a9o<br>7 | 5 | 4 | 9.<br>69      | N0 | 3 | 6<br>1 | 0.043538 | high_risk | NO |
| tcga-v<br>1-a9o<br>a | 4 | 5 | 0.<br>01      | N1 | 3 | 6<br>2 | 0.088644 | high_risk | NO |
| tcga-v<br>1-a9ol     | 5 | 4 | 0.<br>01      | N0 | 3 | 6<br>6 | 0.037507 | high_risk | NO |
| tcga-v<br>1-a9o<br>y | 4 | 3 | 0.<br>09<br>9 | N1 | 3 | 5<br>8 | 0.020857 | high_risk | NO |
| tcga-v<br>1-a9z<br>7 | 5 | 4 | 28<br>.1      | N0 | 3 | 5<br>5 | 0.059858 | high_risk | NO |
| tcga-v<br>1-a9z<br>8 | 5 | 4 | 0.<br>01      | N0 | 3 | 6<br>0 | 0.035112 | high_risk | NO |
| tcga-v<br>1-a9z<br>9 | 4 | 5 | 0.<br>01<br>5 | N0 | 2 | 6<br>4 | 0.021053 | high_risk | NO |
| tcga-v<br>1-a9zg     | 4 | 5 | 0.<br>01<br>5 | N0 | 2 | 6<br>5 | 0.021289 | high_risk | NO |
| tcga-v<br>1-a9zi     | 4 | 5 | 3.<br>11      | N0 | 3 | 6<br>9 | 0.026816 | high_risk | NO |
| tcga-v<br>n-a88<br>k | 4 | 4 | 0             | N1 | 3 | 5<br>9 | 0.043015 | high_risk | NO |
| tcga-v<br>p-a87<br>2 | 5 | 3 | 0.<br>01      | N0 | 3 | 6<br>1 | 0.017301 | high_risk | NO |
| tcga-v<br>p-a87<br>9 | 4 | 5 | 0.<br>01      | N0 | 2 | 7<br>1 | 0.022761 | high_risk | NO |
| tcga-v<br>p-a87<br>d | 4 | 5 | 0.<br>2       | N1 | 3 | 5<br>4 | 0.081852 | high_risk | NO |
| tcga-v<br>p-a87      | 4 | 5 | 0.<br>01      | N0 | 3 | 7<br>7 | 0.02743  | high_risk | NO |

|                      |   |   |          |    |   |        |          |           |    |
|----------------------|---|---|----------|----|---|--------|----------|-----------|----|
| h                    |   |   |          |    |   |        |          |           |    |
| tcga-v<br>p-aa1<br>n | 5 | 4 | 0.<br>01 | N0 | 3 | 7<br>1 | 0.039623 | high_risk | NO |
| tcga-x<br>4-a8k<br>q | 4 | 5 | 0.<br>25 | N0 | 3 | 6<br>6 | 0.024397 | high_risk | NO |
| tcga-x<br>k-aaiv     | 5 | 5 | 0.<br>32 | N1 | 3 | 6<br>4 | 0.247067 | high_risk | NO |
| tcga-x<br>k-aaiv     | 5 | 4 | 0.<br>09 | N0 | 3 | 7<br>9 | 0.04332  | high_risk | NO |
| tcga-x<br>q-a8tb     | 4 | 5 | 0        | N0 | 3 | 6<br>7 | 0.024539 | high_risk | NO |
| tcga-yl<br>-a8hk     | 4 | 5 | 1        | N0 | 3 | 6<br>0 | 0.023189 | high_risk | NO |
| tcga-yl<br>-a8hl     | 4 | 5 | 0.<br>03 | N1 | 3 | 5<br>8 | 0.085059 | high_risk | NO |
| tcga-yl<br>-a8hm     | 4 | 5 | 0.<br>03 | N0 | 3 | 6<br>6 | 0.024282 | high_risk | NO |
| tcga-yl<br>-a8s8     | 4 | 5 | 1.<br>36 | N0 | 3 | 6<br>9 | 0.025831 | high_risk | NO |
| tcga-yl<br>-a8s9     | 4 | 5 | 0.<br>03 | N0 | 3 | 6<br>4 | 0.023747 | high_risk | NO |
| tcga-yl<br>-a8sb     | 4 | 5 | 0.<br>23 | N0 | 3 | 6<br>3 | 0.023585 | high_risk | NO |
| tcga-yl<br>-a8sc     | 4 | 5 | 0.<br>65 | N0 | 3 | 6<br>6 | 0.024607 | high_risk | NO |
| tcga-yl<br>-a8si     | 4 | 5 | 0.<br>48 | N0 | 3 | 6<br>9 | 0.02535  | high_risk | NO |
| tcga-yl<br>-a8sj     | 4 | 5 | 0.<br>24 | N0 | 3 | 6<br>0 | 0.022814 | high_risk | NO |
| tcga-yl<br>-a8sk     | 4 | 5 | 0.<br>03 | N1 | 3 | 6<br>8 | 0.094372 | high_risk | NO |
| tcga-yl<br>-a8sl     | 4 | 4 | 0        | N1 | 3 | 7<br>4 | 0.05064  | high_risk | NO |
| tcga-yl<br>-a8sq     | 4 | 5 | 1.<br>1  | N0 | 3 | 6<br>2 | 0.023763 | high_risk | NO |
| tcga-yl<br>-a8sr     | 4 | 5 | 0.<br>06 | N0 | 3 | 6<br>4 | 0.023763 | high_risk | NO |
| tcga-yl<br>-a9wh     | 4 | 5 | 0.<br>03 | N1 | 3 | 6<br>8 | 0.094372 | high_risk | NO |
| tcga-yl<br>-a9wi     | 4 | 5 | 0.<br>03 | N1 | 3 | 6<br>4 | 0.090542 | high_risk | NO |
| tcga-yl              | 4 | 4 | 3.       | N1 | 3 | 4      | 0.040265 | high_risk | NO |



|                      |   |   |               |    |   |        |          |           |    |
|----------------------|---|---|---------------|----|---|--------|----------|-----------|----|
| -a9wj                |   |   | 1             |    |   | 7      |          |           |    |
| tcga-yl<br>-a9wk     | 4 | 5 | 15<br>.6      | N0 | 3 | 6<br>4 | 0.033101 | high_risk | NO |
| tcga-yl<br>-a9wl     | 4 | 5 | 6.<br>4       | N0 | 3 | 5<br>9 | 0.025743 | high_risk | NO |
| tcga-yl<br>-a9wx     | 4 | 5 | 0.<br>76      | N1 | 3 | 6<br>9 | 0.096743 | high_risk | NO |
| tcga-z<br>g-a8qz     | 4 | 5 | 0.<br>01      | N1 | 3 | 6<br>6 | 0.092402 | high_risk | NO |
| tcga-z<br>g-a9l1     | 4 | 5 | 0.<br>07      | N1 | 3 | 6<br>6 | 0.092513 | high_risk | NO |
| tcga-z<br>g-a9l2     | 4 | 5 | 0.<br>01      | N0 | 3 | 7<br>0 | 0.025377 | high_risk | NO |
| tcga-z<br>g-a9l4     | 5 | 4 | 0.<br>03      | N0 | 3 | 6<br>1 | 0.035516 | high_risk | NO |
| tcga-z<br>g-a9l6     | 5 | 4 | 0.<br>36      | N0 | 3 | 6<br>5 | 0.037373 | high_risk | NO |
| tcga-z<br>g-a9lb     | 5 | 4 | 0.<br>02      | N0 | 3 | 7<br>2 | 0.040068 | high_risk | NO |
| tcga-z<br>g-a9l<br>m | 4 | 5 | 0             | N1 | 3 | 7<br>2 | 0.098289 | high_risk | NO |
| tcga-z<br>g-a9ln     | 5 | 4 | 7.<br>42      | N1 | 3 | 5<br>8 | 0.146233 | high_risk | NO |
| tcga-z<br>g-a9ls     | 5 | 4 | 0.<br>03      | N1 | 3 | 6<br>4 | 0.134917 | high_risk | NO |
| tcga-z<br>g-a9lu     | 5 | 4 | 0.<br>7       | N0 | 3 | 6<br>8 | 0.038903 | high_risk | NO |
| tcga-z<br>g-a9ly     | 4 | 5 | 0.<br>01      | N1 | 3 | 6<br>0 | 0.086817 | high_risk | NO |
| tcga-z<br>g-a9lz     | 4 | 5 | 2.<br>19      | N0 | 3 | 6<br>6 | 0.025431 | high_risk | NO |
| tcga-z<br>g-a9m<br>4 | 5 | 4 | 0.<br>95      | N1 | 3 | 6<br>6 | 0.140017 | high_risk | NO |
| tcga-z<br>g-a9m<br>c | 5 | 4 | 31<br>.8<br>5 | N1 | 3 | 7<br>0 | 0.251366 | high_risk | NO |
| tcga-z<br>g-a9n<br>3 | 5 | 4 | 0.<br>1       | N1 | 3 | 7<br>4 | 0.148996 | high_risk | NO |
| tcga-z<br>g-a9n<br>d | 5 | 4 | 0.<br>08      | N0 | 3 | 5<br>6 | 0.033648 | high_risk | NO |

|                      |   |   |               |    |   |        |          |           |    |
|----------------------|---|---|---------------|----|---|--------|----------|-----------|----|
| tcga-z<br>g-a9ni     | 5 | 4 | 0.<br>03      | NO | 3 | 7<br>3 | 0.040518 | high_risk | NO |
| tcga-c<br>h-576<br>3 | 3 | 4 | 0.<br>1       | NO | 3 | 6<br>7 | 0.003668 | low_risk  | NO |
| tcga-c<br>h-576<br>4 | 4 | 3 | 13<br>.9<br>5 | NO | 3 | 6<br>6 | 0.007669 | low_risk  | NO |
| tcga-c<br>h-579<br>0 | 3 | 4 | 0.<br>1       | NO | 2 | 6<br>4 | 0.003137 | low_risk  | NO |
| tcga-c<br>h-579<br>1 | 3 | 4 | 0.<br>18      | NO | 3 | 7<br>2 | 0.00389  | low_risk  | NO |
| tcga-e<br>j-5542     | 3 | 4 | 0.<br>1       | NO | 3 | 6<br>0 | 0.003388 | low_risk  | NO |
| tcga-e<br>j-7123     | 3 | 4 | 0.<br>1       | NO | 2 | 6<br>0 | 0.002997 | low_risk  | NO |
| tcga-e<br>j-7312     | 4 | 3 | 0.<br>1       | NO | 3 | 5<br>8 | 0.005178 | low_risk  | NO |
| tcga-e<br>j-7325     | 3 | 4 | 0.<br>1       | NO | 3 | 6<br>3 | 0.003505 | low_risk  | NO |
| tcga-e<br>j-7791     | 3 | 4 | 0.<br>1       | NO | 2 | 6<br>7 | 0.003246 | low_risk  | NO |
| tcga-e<br>j-a46b     | 4 | 4 | 0.<br>1       | NO | 3 | 6<br>7 | 0.011915 | low_risk  | NO |
| tcga-e<br>j-a46g     | 4 | 4 | 0.<br>1       | NO | 3 | 7<br>2 | 0.012606 | low_risk  | NO |
| tcga-g<br>9-636<br>4 | 3 | 4 | 0.<br>03      | NO | 3 | 7<br>3 | 0.003921 | low_risk  | NO |
| tcga-h<br>c-774<br>8 | 3 | 3 | 0.<br>1       | NO | 2 | 6<br>0 | 0.001436 | low_risk  | NO |
| tcga-h<br>c-a76<br>w | 3 | 4 | 0.<br>01      | NO | 3 | 7<br>3 | 0.00392  | low_risk  | NO |
| tcga-k<br>c-a7fa     | 3 | 4 | 0             | NO | 3 | 6<br>4 | 0.003538 | low_risk  | NO |
| tcga-q<br>u-a6i<br>m | 3 | 4 | 0.<br>1       | NO | 2 | 6<br>0 | 0.002997 | low_risk  | NO |
| tcga-x<br>k-aaj3     | 4 | 4 | 0.<br>09      | NO | 3 | 5<br>6 | 0.010522 | low_risk  | NO |

|                      |   |   |               |    |   |        |          |          |    |
|----------------------|---|---|---------------|----|---|--------|----------|----------|----|
| tcga-x<br>k-aak1     | 4 | 3 | 0.<br>09      | NO | 2 | 6<br>3 | 0.004849 | low_risk | NO |
| tcga-2<br>a-a8vl     | 3 | 3 | 0.<br>05      | NO | 2 | 5<br>1 | 0.001294 | low_risk | NO |
| tcga-2<br>a-a8vv     | 3 | 3 | 0.<br>05      | NO | 2 | 5<br>2 | 0.001309 | low_risk | NO |
| tcga-2<br>a-a8vx     | 4 | 4 | 0.<br>05      | NO | 3 | 7<br>1 | 0.012451 | low_risk | NO |
| tcga-2<br>a-a8w<br>1 | 4 | 3 | 0.<br>05      | NO | 3 | 5<br>5 | 0.004999 | low_risk | NO |
| tcga-2<br>a-aay<br>u | 3 | 3 | 0.<br>05      | NO | 3 | 5<br>6 | 0.001549 | low_risk | NO |
| tcga-4<br>l-aa1f     | 4 | 4 | 3.<br>5       | NO | 3 | 6<br>5 | 0.012541 | low_risk | NO |
| tcga-c<br>h-573<br>7 | 4 | 3 | 14<br>.6<br>9 | NO | 2 | 7<br>3 | 0.007468 | low_risk | NO |
| tcga-c<br>h-573<br>9 | 3 | 4 | 0.<br>02      | NO | 3 | 6<br>6 | 0.003621 | low_risk | NO |
| tcga-c<br>h-574<br>0 | 3 | 4 | 1.<br>6       | NO | 2 | 5<br>7 | 0.002993 | low_risk | NO |
| tcga-c<br>h-574<br>3 | 3 | 4 | 0.<br>1       | NO | 2 | 6<br>7 | 0.003246 | low_risk | NO |
| tcga-c<br>h-574<br>4 | 4 | 3 | 9.<br>63      | NO | 2 | 6<br>5 | 0.006108 | low_risk | NO |
| tcga-c<br>h-574<br>5 | 3 | 4 | 4.<br>3       | NO | 3 | 6<br>8 | 0.004067 | low_risk | NO |
| tcga-c<br>h-574<br>6 | 3 | 4 | 0.<br>1       | NO | 2 | 5<br>7 | 0.002897 | low_risk | NO |
| tcga-c<br>h-575<br>0 | 3 | 4 | 0.<br>02      | NO | 2 | 7<br>2 | 0.00343  | low_risk | NO |
| tcga-c<br>h-575<br>2 | 4 | 4 | 0.<br>02      | NO | 3 | 6<br>7 | 0.011895 | low_risk | NO |
| tcga-c               | 4 | 3 | 0.            | NO | 3 | 6      | 0.005286 | low_risk | NO |

|  |                      |   |   |          |    |   |        |          |          |    |
|--|----------------------|---|---|----------|----|---|--------|----------|----------|----|
|  | h-576<br>2           |   |   | 01       |    |   | 0      |          |          |    |
|  | tcga-c<br>h-576<br>5 | 3 | 4 | 0.<br>02 | NO | 3 | 5<br>6 | 0.003231 | low_risk | NO |
|  | tcga-c<br>h-576<br>7 | 4 | 3 | 0.<br>04 | NO | 2 | 6<br>7 | 0.005069 | low_risk | NO |
|  | tcga-c<br>h-576<br>8 | 2 | 4 | 0.<br>1  | NO | 3 | 7<br>3 | 0.001202 | low_risk | NO |
|  | tcga-c<br>h-577<br>1 | 4 | 3 | 0.<br>03 | NO | 2 | 6<br>3 | 0.004842 | low_risk | NO |
|  | tcga-c<br>h-578<br>9 | 3 | 4 | 0.<br>02 | NO | 3 | 6<br>2 | 0.00346  | low_risk | NO |
|  | tcga-c<br>h-579<br>4 | 3 | 4 | 0.<br>01 | NO | 2 | 6<br>6 | 0.003203 | low_risk | NO |
|  | tcga-e<br>j-5496     | 3 | 4 | 0.<br>1  | NO | 2 | 6<br>0 | 0.002997 | low_risk | NO |
|  | tcga-e<br>j-5497     | 3 | 4 | 0.<br>1  | NO | 2 | 4<br>8 | 0.002615 | low_risk | NO |
|  | tcga-e<br>j-5498     | 4 | 3 | 0.<br>1  | NO | 2 | 5<br>6 | 0.004479 | low_risk | NO |
|  | tcga-e<br>j-5499     | 4 | 3 | 0.<br>1  | NO | 3 | 6<br>1 | 0.005357 | low_risk | NO |
|  | tcga-e<br>j-5501     | 4 | 3 | 0.<br>1  | NO | 3 | 5<br>6 | 0.005062 | low_risk | NO |
|  | tcga-e<br>j-5502     | 4 | 3 | 0.<br>1  | NO | 2 | 5<br>1 | 0.004232 | low_risk | NO |
|  | tcga-e<br>j-5503     | 5 | 3 | 0.<br>1  | NO | 3 | 5<br>0 | 0.015321 | low_risk | NO |
|  | tcga-e<br>j-5505     | 4 | 3 | 0.<br>1  | NO | 2 | 5<br>8 | 0.004582 | low_risk | NO |
|  | tcga-e<br>j-5508     | 3 | 4 | 0.<br>1  | NO | 3 | 6<br>5 | 0.003586 | low_risk | NO |
|  | tcga-e<br>j-5509     | 3 | 4 | 0.<br>1  | NO | 2 | 6<br>4 | 0.003137 | low_risk | NO |
|  | tcga-e<br>j-5510     | 4 | 3 | 0.<br>1  | NO | 2 | 4<br>9 | 0.004137 | low_risk | NO |
|  | tcga-e<br>j-5511     | 3 | 4 | 0.<br>04 | NO | 3 | 5<br>6 | 0.003233 | low_risk | NO |

|                  |   |   |          |    |   |        |          |          |    |
|------------------|---|---|----------|----|---|--------|----------|----------|----|
| tcga-e<br>j-5512 | 3 | 4 | 0        | NO | 2 | 4<br>7 | 0.002579 | low_risk | NO |
| tcga-e<br>j-5515 | 3 | 4 | 0.<br>1  | NO | 3 | 6<br>1 | 0.003426 | low_risk | NO |
| tcga-e<br>j-5516 | 3 | 4 | 0.<br>12 | NO | 3 | 4<br>9 | 0.002991 | low_risk | NO |
| tcga-e<br>j-5517 | 3 | 3 | 0.<br>1  | NO | 2 | 5<br>6 | 0.001372 | low_risk | NO |
| tcga-e<br>j-5521 | 3 | 4 | 0.<br>1  | NO | 3 | 6<br>4 | 0.003545 | low_risk | NO |
| tcga-e<br>j-5522 | 3 | 4 | 0.<br>1  | NO | 2 | 5<br>2 | 0.002736 | low_risk | NO |
| tcga-e<br>j-5527 | 4 | 3 | 0.<br>1  | NO | 3 | 6<br>9 | 0.005867 | low_risk | NO |
| tcga-e<br>j-5530 | 3 | 4 | 0.<br>1  | NO | 2 | 6<br>1 | 0.003032 | low_risk | NO |
| tcga-e<br>j-5531 | 4 | 3 | 0.<br>1  | NO | 3 | 6<br>2 | 0.005418 | low_risk | NO |
| tcga-e<br>j-5532 | 3 | 4 | 0.<br>1  | NO | 3 | 5<br>8 | 0.003312 | low_risk | NO |
| tcga-e<br>j-7115 | 4 | 3 | 0.<br>1  | NO | 3 | 6<br>6 | 0.00567  | low_risk | NO |
| tcga-e<br>j-7125 | 3 | 4 | 0.<br>1  | NO | 2 | 4<br>5 | 0.002527 | low_risk | NO |
| tcga-e<br>j-7218 | 3 | 4 | 0.<br>1  | NO | 2 | 7<br>2 | 0.003436 | low_risk | NO |
| tcga-e<br>j-7314 | 4 | 3 | 0.<br>1  | NO | 3 | 6<br>2 | 0.005418 | low_risk | NO |
| tcga-e<br>j-7315 | 4 | 3 | 0.<br>1  | NO | 3 | 6<br>9 | 0.005867 | low_risk | NO |
| tcga-e<br>j-7317 | 3 | 4 | 0.<br>1  | NO | 2 | 7<br>1 | 0.003397 | low_risk | NO |
| tcga-e<br>j-7321 | 3 | 3 | 0.<br>1  | NO | 3 | 5<br>8 | 0.001587 | low_risk | NO |
| tcga-e<br>j-7327 | 3 | 4 | 0.<br>1  | NO | 3 | 6<br>2 | 0.003466 | low_risk | NO |
| tcga-e<br>j-7330 | 4 | 3 | 0.<br>1  | NO | 3 | 6<br>9 | 0.005867 | low_risk | NO |
| tcga-e<br>j-7331 | 3 | 4 | 0.<br>8  | NO | 2 | 6<br>4 | 0.003185 | low_risk | NO |
| tcga-e<br>j-7781 | 3 | 4 | 0.<br>1  | NO | 2 | 6<br>6 | 0.003209 | low_risk | NO |
| tcga-e<br>j-7782 | 4 | 4 | 0.<br>1  | NO | 2 | 7<br>1 | 0.01104  | low_risk | NO |

|                      |   |   |          |    |   |        |          |          |    |
|----------------------|---|---|----------|----|---|--------|----------|----------|----|
| tcga-e<br>j-7783     | 4 | 3 | 0.<br>7  | NO | 3 | 7<br>0 | 0.006012 | low_risk | NO |
| tcga-e<br>j-7784     | 4 | 3 | 0.<br>1  | NO | 2 | 6<br>4 | 0.004905 | low_risk | NO |
| tcga-e<br>j-7785     | 3 | 4 | 0.<br>1  | NO | 3 | 5<br>5 | 0.0032   | low_risk | NO |
| tcga-e<br>j-7786     | 3 | 4 | 0.<br>1  | NO | 2 | 6<br>2 | 0.003066 | low_risk | NO |
| tcga-e<br>j-7788     | 3 | 4 | 0.<br>2  | NO | 3 | 5<br>4 | 0.003171 | low_risk | NO |
| tcga-e<br>j-7792     | 3 | 4 | 0.<br>13 | NO | 2 | 5<br>3 | 0.00277  | low_risk | NO |
| tcga-e<br>j-7794     | 3 | 4 | 0.<br>1  | NO | 2 | 6<br>7 | 0.003246 | low_risk | NO |
| tcga-e<br>j-7797     | 3 | 4 | 0.<br>1  | NO | 2 | 5<br>4 | 0.002799 | low_risk | NO |
| tcga-e<br>j-8468     | 4 | 4 | 0.<br>1  | NO | 3 | 6<br>4 | 0.011519 | low_risk | NO |
| tcga-e<br>j-8472     | 4 | 4 | 0.<br>4  | NO | 3 | 6<br>3 | 0.011464 | low_risk | NO |
| tcga-e<br>j-8474     | 4 | 4 | 0.<br>01 | NO | 3 | 7<br>0 | 0.012301 | low_risk | NO |
| tcga-e<br>j-a46d     | 3 | 5 | 0.<br>03 | NO | 2 | 5<br>3 | 0.00576  | low_risk | NO |
| tcga-e<br>j-a46h     | 3 | 4 | 0.<br>1  | NO | 2 | 6<br>0 | 0.002997 | low_risk | NO |
| tcga-e<br>j-a46i     | 3 | 4 | 0.<br>1  | NO | 3 | 5<br>8 | 0.003312 | low_risk | NO |
| tcga-e<br>j-a65d     | 4 | 4 | 0.<br>1  | NO | 3 | 6<br>7 | 0.011915 | low_risk | NO |
| tcga-e<br>j-a65e     | 4 | 3 | 0.<br>1  | NO | 3 | 6<br>7 | 0.005735 | low_risk | NO |
| tcga-e<br>j-a65g     | 3 | 5 | 0.<br>1  | NO | 2 | 5<br>7 | 0.006037 | low_risk | NO |
| tcga-e<br>j-a65<br>m | 3 | 3 | 0.<br>1  | NO | 2 | 6<br>5 | 0.00152  | low_risk | NO |
| tcga-e<br>j-a7nf     | 3 | 4 | 0.<br>1  | NO | 2 | 5<br>6 | 0.002864 | low_risk | NO |
| tcga-e<br>j-a7ng     | 3 | 4 | 0.<br>1  | NO | 3 | 6<br>4 | 0.003545 | low_risk | NO |
| tcga-e<br>j-a7nh     | 3 | 4 | 0.<br>1  | NO | 2 | 5<br>7 | 0.002897 | low_risk | NO |
| tcga-e               | 4 | 4 | 0.       | NO | 2 | 6      | 0.00975  | low_risk | NO |

|                      |   |   |          |    |   |        |          |          |    |
|----------------------|---|---|----------|----|---|--------|----------|----------|----|
| j-a7nj               |   |   | 1        |    |   | 0      |          |          |    |
| tcga-e<br>j-a7nk     | 3 | 4 | 0.<br>1  | NO | 3 | 5<br>9 | 0.003349 | low_risk | NO |
| tcga-e<br>j-a8fn     | 3 | 4 | 0.<br>1  | NO | 2 | 5<br>9 | 0.002963 | low_risk | NO |
| tcga-e<br>j-a8fo     | 4 | 3 | 0.<br>1  | NO | 3 | 5<br>2 | 0.004837 | low_risk | NO |
| tcga-e<br>j-a8fp     | 3 | 5 | 0.<br>2  | NO | 2 | 6<br>0 | 0.006259 | low_risk | NO |
| tcga-e<br>j-a8fs     | 3 | 4 | 0.<br>3  | NO | 3 | 6<br>7 | 0.003685 | low_risk | NO |
| tcga-e<br>j-ab20     | 3 | 3 | 0.<br>1  | NO | 2 | 6<br>2 | 0.001469 | low_risk | NO |
| tcga-e<br>j-ab27     | 3 | 3 | 0.<br>1  | NO | 2 | 5<br>1 | 0.001296 | low_risk | NO |
| tcga-fc<br>-a66v     | 4 | 3 | 10<br>.8 | NO | 3 | 7<br>5 | 0.007929 | low_risk | NO |
| tcga-fc<br>-a8o0     | 3 | 3 | 7.<br>82 | NO | 3 | 6<br>9 | 0.00213  | low_risk | NO |
| tcga-g<br>9-633<br>2 | 4 | 3 | 0.<br>73 | NO | 3 | 5<br>5 | 0.005074 | low_risk | NO |
| tcga-g<br>9-633<br>3 | 4 | 3 | 0.<br>03 | NO | 2 | 6<br>6 | 0.00501  | low_risk | NO |
| tcga-g<br>9-633<br>8 | 4 | 3 | 0.<br>05 | NO | 3 | 6<br>1 | 0.005351 | low_risk | NO |
| tcga-g<br>9-633<br>9 | 3 | 4 | 0.<br>03 | NO | 3 | 5<br>8 | 0.003306 | low_risk | NO |
| tcga-g<br>9-634<br>8 | 3 | 4 | 0.<br>02 | NO | 2 | 6<br>8 | 0.003277 | low_risk | NO |
| tcga-g<br>9-636<br>1 | 3 | 4 | 0.<br>1  | NO | 3 | 6<br>2 | 0.003466 | low_risk | NO |
| tcga-g<br>9-636<br>2 | 4 | 3 | 0.<br>07 | NO | 3 | 5<br>8 | 0.005175 | low_risk | NO |
| tcga-g<br>9-636<br>3 | 4 | 3 | 0.<br>03 | NO | 4 | 6<br>4 | 0.006253 | low_risk | NO |
| tcga-g               | 3 | 4 | 0.       | NO | 4 | 7      | 0.00438  | low_risk | NO |

|  |                      |   |   |          |    |   |        |          |          |    |
|--|----------------------|---|---|----------|----|---|--------|----------|----------|----|
|  | 9-636<br>5           |   |   | 01       |    |   | 2      |          |          |    |
|  | tcga-g<br>9-636<br>9 | 4 | 3 | 0.<br>03 | NO | 2 | 5<br>5 | 0.004422 | low_risk | NO |
|  | tcga-g<br>9-637<br>0 | 3 | 4 | 0.<br>03 | NO | 3 | 5<br>2 | 0.003088 | low_risk | NO |
|  | tcga-g<br>9-637<br>7 | 3 | 4 | 0.<br>03 | NO | 2 | 6<br>1 | 0.003027 | low_risk | NO |
|  | tcga-g<br>9-637<br>9 | 4 | 3 | 0.<br>03 | NO | 3 | 6<br>9 | 0.005858 | low_risk | NO |
|  | tcga-g<br>9-638<br>4 | 3 | 4 | 0.<br>03 | NO | 3 | 5<br>4 | 0.003159 | low_risk | NO |
|  | tcga-g<br>9-649<br>4 | 4 | 3 | 1.<br>13 | NO | 4 | 6<br>7 | 0.006627 | low_risk | NO |
|  | tcga-g<br>9-649<br>6 | 4 | 3 | 0.<br>03 | NO | 2 | 6<br>2 | 0.004788 | low_risk | NO |
|  | tcga-g<br>9-751<br>0 | 4 | 4 | 0.<br>03 | NO | 3 | 6<br>6 | 0.011764 | low_risk | NO |
|  | tcga-g<br>9-752<br>2 | 3 | 4 | 0.<br>1  | NO | 2 | 4<br>9 | 0.002645 | low_risk | NO |
|  | tcga-g<br>9-752<br>5 | 4 | 3 | 0.<br>03 | NO | 2 | 6<br>4 | 0.004898 | low_risk | NO |
|  | tcga-g<br>9-a9s7     | 4 | 4 | 0.<br>13 | NO | 3 | 5<br>5 | 0.010413 | low_risk | NO |
|  | tcga-h<br>c-707<br>8 | 3 | 4 | 0.<br>01 | NO | 3 | 7<br>0 | 0.003788 | low_risk | NO |
|  | tcga-h<br>c-707<br>9 | 3 | 4 | 0.<br>1  | NO | 3 | 5<br>1 | 0.003058 | low_risk | NO |
|  | tcga-h<br>c-708<br>0 | 3 | 4 | 0.<br>1  | NO | 2 | 6<br>6 | 0.003209 | low_risk | NO |
|  | tcga-h               | 3 | 3 | 0.       | NO | 2 | 6      | 0.001451 | low_risk | NO |



|  |                      |   |   |          |    |   |        |          |          |    |
|--|----------------------|---|---|----------|----|---|--------|----------|----------|----|
|  | c-720<br>9           |   |   | 05       |    |   | 1      |          |          |    |
|  | tcga-h<br>c-721<br>0 | 3 | 4 | 0.<br>1  | NO | 2 | 7<br>5 | 0.003555 | low_risk | NO |
|  | tcga-h<br>c-721<br>1 | 3 | 4 | 10<br>.9 | NO | 2 | 6<br>2 | 0.003883 | low_risk | NO |
|  | tcga-h<br>c-721<br>2 | 3 | 4 | 0.<br>28 | NO | 2 | 5<br>6 | 0.002875 | low_risk | NO |
|  | tcga-h<br>c-723<br>0 | 3 | 4 | 3        | NO | 2 | 5<br>1 | 0.002883 | low_risk | NO |
|  | tcga-h<br>c-773<br>6 | 3 | 4 | 0.<br>02 | NO | 2 | 5<br>9 | 0.002958 | low_risk | NO |
|  | tcga-h<br>c-773<br>7 | 3 | 4 | 0.<br>1  | N1 | 2 | 5<br>5 | 0.011488 | low_risk | NO |
|  | tcga-h<br>c-774<br>0 | 3 | 4 | 0        | NO | 2 | 6<br>0 | 0.002991 | low_risk | NO |
|  | tcga-h<br>c-774<br>2 | 3 | 4 | 0.<br>1  | NO | 3 | 5<br>8 | 0.003312 | low_risk | NO |
|  | tcga-h<br>c-774<br>4 | 4 | 3 | 0.<br>04 | NO | 3 | 4<br>7 | 0.004564 | low_risk | NO |
|  | tcga-h<br>c-774<br>7 | 3 | 4 | 0.<br>19 | NO | 2 | 5<br>3 | 0.002773 | low_risk | NO |
|  | tcga-h<br>c-774<br>9 | 4 | 3 | 0.<br>1  | NO | 3 | 7<br>0 | 0.005933 | low_risk | NO |
|  | tcga-h<br>c-775<br>2 | 3 | 4 | 0.<br>1  | NO | 2 | 6<br>1 | 0.003032 | low_risk | NO |
|  | tcga-h<br>c-781<br>8 | 3 | 4 | 0.<br>01 | NO | 2 | 6<br>7 | 0.003239 | low_risk | NO |
|  | tcga-h<br>c-781<br>9 | 4 | 4 | 0.<br>01 | NO | 2 | 5<br>4 | 0.009092 | low_risk | NO |

|                      |   |   |          |    |   |        |          |          |    |
|----------------------|---|---|----------|----|---|--------|----------|----------|----|
| tcga-h<br>c-821<br>6 | 4 | 3 | 0.<br>19 | NO | 3 | 5<br>9 | 0.005247 | low_risk | NO |
| tcga-h<br>c-825<br>7 | 3 | 4 | 0.<br>1  | N1 | 3 | 7<br>0 | 0.015355 | low_risk | NO |
| tcga-h<br>c-825<br>8 | 3 | 3 | 0.<br>01 | NO | 2 | 5<br>7 | 0.001385 | low_risk | NO |
| tcga-h<br>c-826<br>0 | 3 | 4 | 0.<br>01 | NO | 2 | 4<br>4 | 0.002493 | low_risk | NO |
| tcga-h<br>c-826<br>2 | 4 | 4 | 0.<br>1  | NO | 2 | 5<br>7 | 0.009425 | low_risk | NO |
| tcga-h<br>c-826<br>5 | 3 | 5 | 0.<br>1  | NO | 3 | 6<br>7 | 0.007639 | low_risk | NO |
| tcga-h<br>c-a76x     | 3 | 4 | 0.<br>01 | NO | 2 | 6<br>2 | 0.00306  | low_risk | NO |
| tcga-h<br>c-a8d<br>0 | 3 | 4 | 0.<br>01 | NO | 2 | 6<br>2 | 0.00306  | low_risk | NO |
| tcga-h<br>c-a8d<br>1 | 3 | 4 | 0.<br>01 | NO | 2 | 6<br>9 | 0.003314 | low_risk | NO |
| tcga-h<br>i-7169     | 3 | 4 | 0.<br>1  | NO | 3 | 5<br>5 | 0.0032   | low_risk | NO |
| tcga-h<br>i-7170     | 3 | 3 | 0.<br>1  | NO | 2 | 5<br>8 | 0.001403 | low_risk | NO |
| tcga-j<br>4-820<br>0 | 3 | 4 | 0.<br>1  | NO | 2 | 4<br>7 | 0.002585 | low_risk | NO |
| tcga-j<br>4-a67l     | 3 | 4 | 0.<br>01 | NO | 3 | 5<br>5 | 0.003194 | low_risk | NO |
| tcga-j<br>4-a67<br>m | 4 | 3 | 0.<br>1  | NO | 3 | 5<br>5 | 0.005005 | low_risk | NO |
| tcga-j<br>4-a67<br>n | 3 | 4 | 0.<br>7  | NO | 3 | 6<br>1 | 0.003472 | low_risk | NO |
| tcga-j<br>4-a67<br>o | 3 | 4 | 0.<br>1  | NO | 2 | 5<br>9 | 0.002963 | low_risk | NO |

|                      |   |   |          |    |   |        |          |          |    |
|----------------------|---|---|----------|----|---|--------|----------|----------|----|
| tcga-j<br>4-a67r     | 4 | 3 | 0.<br>1  | NO | 2 | 6<br>5 | 0.004961 | low_risk | NO |
| tcga-j<br>4-a67s     | 3 | 4 | 0.<br>1  | NO | 3 | 6<br>4 | 0.003545 | low_risk | NO |
| tcga-j<br>4-a6g<br>1 | 4 | 4 | 0.<br>1  | NO | 3 | 6<br>8 | 0.01205  | low_risk | NO |
| tcga-j<br>4-a6g<br>3 | 4 | 4 | 0.<br>4  | NO | 3 | 5<br>7 | 0.010713 | low_risk | NO |
| tcga-j<br>4-a83i     | 4 | 3 | 0.<br>1  | NO | 3 | 6<br>4 | 0.005543 | low_risk | NO |
| tcga-j<br>4-a83j     | 3 | 4 | 0.<br>04 | NO | 2 | 6<br>8 | 0.003279 | low_risk | NO |
| tcga-j<br>4-a83l     | 3 | 4 | 0.<br>1  | NO | 2 | 6<br>1 | 0.003032 | low_risk | NO |
| tcga-j<br>4-a83<br>m | 4 | 3 | 0.<br>2  | NO | 2 | 6<br>5 | 0.004972 | low_risk | NO |
| tcga-j<br>4-aatv     | 3 | 3 | 0        | NO | 2 | 7<br>1 | 0.001624 | low_risk | NO |
| tcga-j<br>4-aa<br>u2 | 3 | 3 | 0        | NO | 2 | 5<br>9 | 0.001416 | low_risk | NO |
| tcga-k<br>c-a4bl     | 3 | 4 | 3.<br>15 | NO | 2 | 6<br>6 | 0.00343  | low_risk | NO |
| tcga-k<br>c-a4b<br>n | 3 | 4 | 0        | NO | 2 | 5<br>6 | 0.002858 | low_risk | NO |
| tcga-k<br>c-a4b<br>o | 3 | 4 | 0.<br>04 | NO | 2 | 5<br>6 | 0.00286  | low_risk | NO |
| tcga-k<br>c-a7f3     | 3 | 4 | 0        | NO | 2 | 6<br>8 | 0.003276 | low_risk | NO |
| tcga-k<br>c-a7f5     | 4 | 3 | 0        | NO | 2 | 5<br>5 | 0.004419 | low_risk | NO |
| tcga-k<br>c-a7f6     | 3 | 4 | 0        | NO | 2 | 6<br>4 | 0.00313  | low_risk | NO |
| tcga-k<br>c-a7fd     | 3 | 4 | 0        | NO | 3 | 6<br>2 | 0.003458 | low_risk | NO |
| tcga-k<br>c-a7fe     | 3 | 4 | 0        | NO | 2 | 6<br>2 | 0.003059 | low_risk | NO |
| tcga-k<br>k-a59z     | 4 | 3 | 0.<br>1  | NO | 2 | 6<br>7 | 0.005075 | low_risk | NO |

|                      |   |   |         |    |   |        |          |          |    |
|----------------------|---|---|---------|----|---|--------|----------|----------|----|
| tcga-k<br>k-a6d<br>y | 3 | 4 | 0.<br>1 | NO | 2 | 5<br>0 | 0.002675 | low_risk | NO |
| tcga-k<br>k-a6e<br>2 | 3 | 4 | 0.<br>1 | NO | 2 | 5<br>5 | 0.002831 | low_risk | NO |
| tcga-k<br>k-a6e<br>3 | 3 | 4 | 0.<br>1 | NO | 2 | 5<br>6 | 0.002864 | low_risk | NO |
| tcga-k<br>k-a6e<br>4 | 3 | 4 | 0.<br>1 | NO | 2 | 6<br>9 | 0.00332  | low_risk | NO |
| tcga-k<br>k-a6e<br>5 | 4 | 3 | 0.<br>1 | NO | 3 | 6<br>3 | 0.00548  | low_risk | NO |
| tcga-k<br>k-a7a<br>q | 4 | 3 | 0.<br>1 | NO | 2 | 6<br>2 | 0.004795 | low_risk | NO |
| tcga-k<br>k-a7av     | 3 | 4 | 0.<br>1 | NO | 2 | 5<br>8 | 0.00293  | low_risk | NO |
| tcga-k<br>k-a7ay     | 4 | 3 | 0.<br>2 | NO | 2 | 6<br>1 | 0.004751 | low_risk | NO |
| tcga-k<br>k-a7b<br>1 | 4 | 3 | 0.<br>1 | NO | 3 | 6<br>5 | 0.005606 | low_risk | NO |
| tcga-k<br>k-a8i5     | 3 | 4 | 0.<br>1 | NO | 2 | 5<br>6 | 0.002864 | low_risk | NO |
| tcga-k<br>k-a8i6     | 4 | 3 | 0.<br>2 | NO | 3 | 5<br>9 | 0.005249 | low_risk | NO |
| tcga-k<br>k-a8i9     | 4 | 4 | 0.<br>1 | NO | 3 | 6<br>1 | 0.011135 | low_risk | NO |
| tcga-k<br>k-a8if     | 4 | 3 | 0.<br>7 | NO | 3 | 5<br>7 | 0.005187 | low_risk | NO |
| tcga-k<br>k-a8ig     | 4 | 3 | 0.<br>1 | NO | 3 | 5<br>6 | 0.005062 | low_risk | NO |
| tcga-k<br>k-a8ih     | 4 | 3 | 0.<br>1 | NO | 3 | 5<br>1 | 0.004782 | low_risk | NO |
| tcga-k<br>k-a8i<br>m | 4 | 3 | 0.<br>1 | NO | 2 | 5<br>6 | 0.004479 | low_risk | NO |
| tcga-q<br>u-a6il     | 3 | 4 | 0.<br>2 | NO | 2 | 6<br>5 | 0.00318  | low_risk | NO |
| tcga-q<br>u-a6in     | 3 | 4 | 0.<br>1 | NO | 2 | 6<br>1 | 0.003032 | low_risk | NO |

|  |                      |   |   |               |    |   |        |          |          |    |
|--|----------------------|---|---|---------------|----|---|--------|----------|----------|----|
|  | tcga-q<br>u-a6io     | 3 | 3 | 0.<br>1       | NO | 2 | 5<br>4 | 0.001341 | low_risk | NO |
|  | tcga-q<br>u-a6ip     | 3 | 3 | 0             | NO | 2 | 6<br>6 | 0.001534 | low_risk | NO |
|  | tcga-s<br>u-a7e<br>7 | 5 | 3 | 0.<br>01      | NO | 2 | 6<br>1 | 0.015331 | low_risk | NO |
|  | tcga-t<br>p-a8tt     | 4 | 3 | 0.<br>02<br>4 | NO | 3 | 6<br>4 | 0.005534 | low_risk | NO |
|  | tcga-t<br>p-a8tv     | 4 | 3 | 0.<br>01<br>9 | NO | 2 | 6<br>3 | 0.004841 | low_risk | NO |
|  | tcga-v<br>1-a8m<br>f | 3 | 3 | 0.<br>14      | NO | 3 | 6<br>6 | 0.00174  | low_risk | NO |
|  | tcga-v<br>1-a8m<br>j | 3 | 4 | 0.<br>01<br>5 | N1 | 3 | 5<br>9 | 0.013543 | low_risk | NO |
|  | tcga-v<br>1-a8m<br>k | 3 | 3 | 0.<br>83      | NO | 2 | 4<br>2 | 0.001188 | low_risk | NO |
|  | tcga-v<br>1-a8m<br>l | 3 | 4 | 0.<br>01      | NO | 2 | 6<br>4 | 0.003131 | low_risk | NO |
|  | tcga-v<br>1-a8m<br>m | 4 | 3 | 0.<br>37      | NO | 3 | 6<br>1 | 0.005389 | low_risk | NO |
|  | tcga-v<br>1-a8m<br>u | 3 | 4 | 0.<br>01<br>5 | N1 | 3 | 5<br>7 | 0.013241 | low_risk | NO |
|  | tcga-v<br>1-a8w<br>l | 3 | 4 | 0.<br>01<br>5 | NO | 3 | 6<br>5 | 0.003579 | low_risk | NO |
|  | tcga-v<br>1-a8x<br>3 | 3 | 4 | 0.<br>03      | NO | 2 | 5<br>2 | 0.002732 | low_risk | NO |
|  | tcga-v<br>1-a9o<br>9 | 3 | 5 | 5.<br>04      | NO | 3 | 5<br>7 | 0.007596 | low_risk | NO |
|  | tcga-v<br>1-a9o<br>x | 3 | 5 | 0.<br>04      | NO | 2 | 5<br>7 | 0.006029 | low_risk | NO |
|  | tcga-v               | 4 | 4 | 0.            | NO | 3 | 6      | 0.012163 | low_risk | NO |

|  |                      |   |   |          |    |   |        |          |          |    |
|--|----------------------|---|---|----------|----|---|--------|----------|----------|----|
|  | 1-a9zk               |   |   | 01       |    |   | 9      |          |          |    |
|  | tcga-v<br>1-a9zr     | 4 | 4 | 1.<br>44 | NO | 4 | 6<br>9 | 0.014163 | low_risk | NO |
|  | tcga-v<br>n-a88i     | 4 | 4 | 0.<br>16 | NO | 3 | 5<br>9 | 0.010901 | low_risk | NO |
|  | tcga-v<br>n-a88l     | 3 | 4 | 0        | NO | 2 | 5<br>5 | 0.002825 | low_risk | NO |
|  | tcga-v<br>n-a88<br>n | 4 | 3 | 0        | NO | 2 | 6<br>2 | 0.004785 | low_risk | NO |
|  | tcga-v<br>n-a88<br>o | 3 | 4 | 0        | NO | 2 | 4<br>9 | 0.002639 | low_risk | NO |
|  | tcga-v<br>n-a88<br>p | 3 | 4 | 0        | NO | 2 | 6<br>0 | 0.002991 | low_risk | NO |
|  | tcga-v<br>n-a88<br>q | 4 | 4 | 0        | NO | 2 | 6<br>1 | 0.009839 | low_risk | NO |
|  | tcga-v<br>n-a88r     | 4 | 4 | 0.<br>15 | NO | 2 | 5<br>3 | 0.009018 | low_risk | NO |
|  | tcga-v<br>n-a94<br>3 | 4 | 4 | 0.<br>01 | NO | 2 | 7<br>2 | 0.011143 | low_risk | NO |
|  | tcga-v<br>p-a87<br>5 | 3 | 4 | 0.<br>01 | NO | 3 | 6<br>8 | 0.003703 | low_risk | NO |
|  | tcga-v<br>p-a87<br>6 | 3 | 5 | 0.<br>1  | NO | 2 | 4<br>6 | 0.005328 | low_risk | NO |
|  | tcga-v<br>p-a87<br>b | 4 | 4 | 3.<br>37 | NO | 2 | 6<br>4 | 0.010951 | low_risk | NO |
|  | tcga-v<br>p-a87<br>c | 4 | 3 | 0.<br>5  | NO | 2 | 6<br>7 | 0.00512  | low_risk | NO |
|  | tcga-v<br>p-a87<br>e | 3 | 3 | 0.<br>11 | NO | 2 | 6<br>0 | 0.001436 | low_risk | NO |
|  | tcga-v<br>p-a87j     | 3 | 4 | 0.<br>13 | N1 | 3 | 5<br>7 | 0.013274 | low_risk | NO |
|  | tcga-v<br>p-a87<br>k | 4 | 4 | 0.<br>3  | NO | 3 | 6<br>3 | 0.011439 | low_risk | NO |

|              |   |   |      |    |   |    |          |          |    |
|--------------|---|---|------|----|---|----|----------|----------|----|
| tcga-ww-a8zi | 4 | 4 | 0    | NO | 2 | 70 | 0.010892 | low_risk | NO |
| tcga-xa-a8jr | 4 | 3 | 0    | NO | 2 | 69 | 0.00518  | low_risk | NO |
| tcga-xk-aair | 4 | 4 | 0.09 | NO | 2 | 76 | 0.011678 | low_risk | NO |
| tcga-xk-aaja | 4 | 3 | 0.09 | NO | 3 | 62 | 0.005417 | low_risk | NO |
| tcga-xk-aajp | 4 | 3 | 0.09 | NO | 3 | 67 | 0.005734 | low_risk | NO |
| tcga-xk-aajr | 4 | 3 | 0.09 | NO | 3 | 62 | 0.005417 | low_risk | NO |
| tcga-xk-aajt | 4 | 3 | 0.09 | NO | 3 | 75 | 0.006278 | low_risk | NO |
| tcga-xk-aaju | 4 | 3 | 0.09 | NO | 2 | 66 | 0.005017 | low_risk | NO |
| tcga-y6-a8tl | 3 | 3 | 0    | NO | 3 | 65 | 0.001715 | low_risk | NO |
| tcga-yl-a8ho | 4 | 3 | 0.01 | NO | 3 | 67 | 0.005724 | low_risk | NO |
| tcga-yl-a8sa | 4 | 4 | 0.06 | NO | 3 | 69 | 0.012176 | low_risk | NO |
| tcga-yl-a8sf | 4 | 4 | 0.01 | NO | 3 | 63 | 0.011367 | low_risk | NO |
| tcga-yl-a8sh | 4 | 3 | 0.06 | NO | 3 | 70 | 0.005928 | low_risk | NO |
