# Supplementary material
Source: publisher site journal article supplement (https://static.cambridge.org/content/id/urn%3Acambridge.org%3Aid%3Aarticle%3AS001667230050072X/resource/name/S001667230050072Xsupp001.zip)
Supplement: Supplementary file 2 [file S001667230050072Xsupp001.zip]

**Supplementary Data2: TMB scores of TCGA samples**

|  | <b>id</b>    | <b>TMB</b> |
|--|--------------|------------|
|  | TCGA-XJ-A83H | 0.5        |
|  | TCGA-EJ-7789 | 0.789474   |
|  | TCGA-V1-A8WV | 1.157895   |
|  | TCGA-VP-A87K | 0.736842   |
|  | TCGA-HC-7077 | 1.421053   |
|  | TCGA-CH-5792 | 0.842105   |
|  | TCGA-CH-5761 | 1.421053   |
|  | TCGA-V1-A9ZG | 0.842105   |
|  | TCGA-HC-8213 | 0.342105   |
|  | TCGA-HC-A48F | 0.789474   |
|  | TCGA-V1-A9ZK | 0.526316   |
|  | TCGA-KK-A8IB | 1          |
|  | TCGA-V1-A9OY | 0.5        |
|  | TCGA-J4-A67T | 0.447368   |
|  | TCGA-2A-A8VL | 0.842105   |
|  | TCGA-XK-AAJU | 0.052632   |
|  | TCGA-V1-A8X3 | 0.605263   |
|  | TCGA-EJ-5524 | 0.736842   |
|  | TCGA-YL-A8HM | 1.105263   |
|  | TCGA-HC-A6HX | 0.394737   |
|  | TCGA-EJ-7321 | 0.526316   |
|  | TCGA-HC-8258 | 0.131579   |
|  | TCGA-EJ-A8FN | 0.921053   |
|  | TCGA-J4-A67R | 0.131579   |
|  | TCGA-V1-A9OL | 0.868421   |
|  | TCGA-HC-A6AP | 0.421053   |
|  | TCGA-J4-A67S | 0.394737   |
|  | TCGA-KK-A6E0 | 0.842105   |
|  | TCGA-EJ-A65G | 0.473684   |
|  | TCGA-EJ-5512 | 0.421053   |
|  | TCGA-EJ-5532 | 0.736842   |
|  | TCGA-CH-5746 | 0.236842   |
|  | TCGA-V1-A9O9 | 0.657895   |
|  | TCGA-YL-A9WY | 0.894737   |
|  | TCGA-KC-A7F6 | 0.526316   |
|  | TCGA-YL-A8S9 | 0.921053   |
|  | TCGA-KK-A8I5 | 1.078947   |
|  | TCGA-CH-5767 | 0.815789   |
|  | TCGA-HC-A76W | 0.894737   |
|  | TCGA-M7-A723 | 0.026316   |

|              |          |
|--------------|----------|
| TCGA-XQ-A8TA | 3        |
| TCGA-EJ-5504 | 1.052632 |
| TCGA-KK-A7B1 | 0.447368 |
| TCGA-HC-8262 | 0.868421 |
| TCGA-CH-5794 | 0.815789 |
| TCGA-EJ-7781 | 0.842105 |
| TCGA-KK-A8I7 | 0.210526 |
| TCGA-VN-A88R | 0.657895 |
| TCGA-J4-A6M7 | 0.447368 |
| TCGA-EJ-8474 | 0.947368 |
| TCGA-EJ-7786 | 0.368421 |
| TCGA-FC-A5OB | 0.578947 |
| TCGA-EJ-5517 | 0.657895 |
| TCGA-G9-A9S7 | 0.578947 |
| TCGA-2A-A8VT | 0.868421 |
| TCGA-VP-A879 | 0.868421 |
| TCGA-KK-A6E7 | 0.736842 |
| TCGA-KK-A7AW | 0.789474 |
| TCGA-HC-A6AL | 1.394737 |
| TCGA-YL-A8SP | 0.710526 |
| TCGA-EJ-5511 | 0.973684 |
| TCGA-G9-6373 | 0.763158 |
| TCGA-M7-A71Z | 0.684211 |
| TCGA-CH-5772 | 0.736842 |
| TCGA-CH-5789 | 0.026316 |
| TCGA-HC-7817 | 0.421053 |
| TCGA-ZG-A9L9 | 1.026316 |
| TCGA-EJ-7325 | 0.815789 |
| TCGA-EJ-7317 | 0.789474 |
| TCGA-CH-5766 | 0.710526 |
| TCGA-KK-A8IL | 0.842105 |
| TCGA-HC-7819 | 0.342105 |
| TCGA-HC-A8D0 | 0.605263 |
| TCGA-VN-A88P | 1.210526 |
| TCGA-J9-A8CP | 0.789474 |
| TCGA-HC-A6AQ | 0.342105 |
| TCGA-KC-A4BR | 0.026316 |
| TCGA-VP-A87C | 0.578947 |
| TCGA-HC-A8CY | 0.868421 |
| TCGA-EJ-A65D | 0.973684 |
| TCGA-X4-A8KS | 0.263158 |
| TCGA-YL-A8SI | 0.210526 |
| TCGA-G9-6351 | 0.473684 |

|              |          |
|--------------|----------|
| TCGA-VP-A87H | 0.736842 |
| TCGA-Y6-A9XI | 1.184211 |
| TCGA-QU-A6IN | 0.684211 |
| TCGA-EJ-A65M | 0.789474 |
| TCGA-2A-A8VO | 0.815789 |
| TCGA-J9-A8CM | 2.078947 |
| TCGA-ZG-A9LY | 0.894737 |
| TCGA-TP-A8TV | 1.052632 |
| TCGA-YL-A8SC | 1        |
| TCGA-V1-A8ML | 0.236842 |
| TCGA-XK-AAIW | 236      |
| TCGA-QU-A6IP | 0.473684 |
| TCGA-YL-A8SO | 0.842105 |
| TCGA-YL-A8SF | 0.552632 |
| TCGA-KK-A8I6 | 0.657895 |
| TCGA-KK-A6E2 | 1        |
| TCGA-YL-A8SL | 1.263158 |
| TCGA-G9-6364 | 0.473684 |
| TCGA-2A-AAYO | 0.526316 |
| TCGA-V1-A9OA | 0.5      |
| TCGA-G9-7523 | 0.236842 |
| TCGA-HC-A6AS | 0.394737 |
| TCGA-EJ-5516 | 0.447368 |
| TCGA-EJ-7793 | 0.131579 |
| TCGA-V1-A9O7 | 0.473684 |
| TCGA-HC-A6AO | 0.947368 |
| TCGA-KK-A8IK | 0.894737 |
| TCGA-KK-A8ID | 1.710526 |
| TCGA-XJ-A9DI | 0.105263 |
| TCGA-G9-6362 | 0.894737 |
| TCGA-YL-A8HK | 0.5      |
| TCGA-XK-AAJP | 0.947368 |
| TCGA-FC-A8O0 | 0.342105 |
| TCGA-ZG-A9LZ | 0.736842 |
| TCGA-G9-6377 | 0.5      |
| TCGA-TP-A8TT | 0.763158 |
| TCGA-EJ-A6RA | 0.052632 |
| TCGA-HC-7209 | 0.657895 |
| TCGA-G9-7525 | 0.789474 |
| TCGA-EJ-8469 | 0.605263 |
| TCGA-J9-A52C | 16.21053 |
| TCGA-YJ-A8SW | 1.684211 |
| TCGA-EJ-A65J | 0.921053 |

|              |          |
|--------------|----------|
| TCGA-HC-8216 | 1.315789 |
| TCGA-KK-A6E1 | 0.684211 |
| TCGA-EJ-5497 | 0.342105 |
| TCGA-G9-6384 | 0.526316 |
| TCGA-KK-A7AQ | 0.657895 |
| TCGA-V1-A9ZI | 0.921053 |
| TCGA-EJ-5525 | 1.815789 |
| TCGA-EJ-8470 | 0.657895 |
| TCGA-EJ-A8FS | 1        |
| TCGA-EJ-5519 | 2        |
| TCGA-YL-A8SJ | 0.710526 |
| TCGA-HC-7738 | 0.789474 |
| TCGA-ZG-A9LN | 0.789474 |
| TCGA-EJ-7218 | 0.421053 |
| TCGA-KC-A7F5 | 0.947368 |
| TCGA-H9-A6BX | 0.052632 |
| TCGA-V1-A9Z9 | 0.868421 |
| TCGA-XK-AAJR | 0.789474 |
| TCGA-EJ-5530 | 0.578947 |
| TCGA-EJ-A8FO | 0.289474 |
| TCGA-EJ-5505 | 0.947368 |
| TCGA-KK-A5A1 | 2.368421 |
| TCGA-G9-6366 | 0.657895 |
| TCGA-VP-A876 | 0.526316 |
| TCGA-G9-6361 | 0.868421 |
| TCGA-M7-A725 | 0.815789 |
| TCGA-HC-7078 | 0.868421 |
| TCGA-EJ-5521 | 0.868421 |
| TCGA-HC-7750 | 0.315789 |
| TCGA-EJ-5496 | 0.815789 |
| TCGA-EJ-A46B | 0.052632 |
| TCGA-J4-A83N | 0.394737 |
| TCGA-YL-A9WI | 1.210526 |
| TCGA-CH-5744 | 0.789474 |
| TCGA-EJ-A8FP | 0.026316 |
| TCGA-HC-A9TH | 1.315789 |
| TCGA-KC-A7FD | 1.157895 |
| TCGA-CH-5739 | 0.921053 |
| TCGA-CH-5754 | 2.578947 |
| TCGA-HI-7171 | 0.789474 |
| TCGA-KK-A8IA | 0.973684 |
| TCGA-V1-A9ZR | 1.105263 |
| TCGA-G9-6333 | 0.578947 |

|              |          |
|--------------|----------|
| TCGA-HC-8261 | 0.078947 |
| TCGA-HI-7168 | 1.052632 |
| TCGA-HC-7821 | 0.605263 |
| TCGA-HC-A76X | 0.657895 |
| TCGA-KK-A6E8 | 0.947368 |
| TCGA-SU-A7E7 | 0.368421 |
| TCGA-EJ-A46I | 0.052632 |
| TCGA-CH-5748 | 0.394737 |
| TCGA-ZG-A9KY | 1.868421 |
| TCGA-KK-A8IJ | 0.605263 |
| TCGA-KK-A8IC | 0.447368 |
| TCGA-EJ-A65F | 1.842105 |
| TCGA-EJ-A46D | 0.131579 |
| TCGA-J4-A67M | 0.842105 |
| TCGA-XJ-A9DX | 1.815789 |
| TCGA-CH-5768 | 1        |
| TCGA-KK-A7B4 | 0.921053 |
| TCGA-HC-8260 | 0.157895 |
| TCGA-EJ-AB20 | 0.236842 |
| TCGA-HC-7230 | 0.578947 |
| TCGA-G9-6339 | 1.263158 |
| TCGA-EJ-7784 | 0.710526 |
| TCGA-EJ-8472 | 1.447368 |
| TCGA-G9-6371 | 0.447368 |
| TCGA-ZG-A9LU | 0.289474 |
| TCGA-EJ-5515 | 0.078947 |
| TCGA-HC-7737 | 0.236842 |
| TCGA-J4-A67N | 0.552632 |
| TCGA-KK-A6E5 | 0.342105 |
| TCGA-EJ-A7NN | 1        |
| TCGA-VP-A875 | 0.973684 |
| TCGA-G9-6499 | 0.894737 |
| TCGA-VN-A88N | 0.447368 |
| TCGA-G9-7522 | 0.210526 |
| TCGA-YL-A8SQ | 0.894737 |
| TCGA-YL-A9WL | 0.605263 |
| TCGA-V1-A9O5 | 0.868421 |
| TCGA-CH-5751 | 0.736842 |
| TCGA-G9-6332 | 0.710526 |
| TCGA-CH-5738 | 0.263158 |
| TCGA-HC-A6AN | 1        |
| TCGA-VP-A87B | 0.842105 |
| TCGA-KK-A8II | 0.947368 |

|              |          |
|--------------|----------|
| TCGA-HC-A9TE | 1.289474 |
| TCGA-VP-A872 | 0.578947 |
| TCGA-EJ-5501 | 0.526316 |
| TCGA-ZG-A9M4 | 1        |
| TCGA-CH-5752 | 0.894737 |
| TCGA-KK-A59V | 25.05263 |
| TCGA-EJ-5510 | 0.657895 |
| TCGA-HC-8259 | 0.421053 |
| TCGA-EJ-AB27 | 0.210526 |
| TCGA-G9-A9S4 | 1.052632 |
| TCGA-KC-A4BN | 0.315789 |
| TCGA-ZG-A9L1 | 0.842105 |
| TCGA-CH-5765 | 0.973684 |
| TCGA-HC-8256 | 0.710526 |
| TCGA-G9-6354 | 0.5      |
| TCGA-J9-A8CN | 0.473684 |
| TCGA-CH-5745 | 0.657895 |
| TCGA-G9-6378 | 0.657895 |
| TCGA-G9-6496 | 1.078947 |
| TCGA-G9-6365 | 0.473684 |
| TCGA-KK-A7AP | 0.868421 |
| TCGA-V1-A8WN | 0.394737 |
| TCGA-M7-A722 | 0.921053 |
| TCGA-EJ-5509 | 0.394737 |
| TCGA-G9-6370 | 0.026316 |
| TCGA-V1-A8MF | 0.868421 |
| TCGA-XQ-A8TB | 0.763158 |
| TCGA-EJ-A46G | 1.526316 |
| TCGA-2A-A8W3 | 1.131579 |
| TCGA-J4-A6G3 | 0.236842 |
| TCGA-M7-A71Y | 0.184211 |
| TCGA-KK-A7B0 | 0.736842 |
| TCGA-J4-A67Q | 0.394737 |
| TCGA-4L-AA1F | 0.552632 |
| TCGA-XK-AAJ3 | 1.736842 |
| TCGA-YL-A8HJ | 0.763158 |
| TCGA-M7-A721 | 0.473684 |
| TCGA-XK-AAIR | 0.473684 |
| TCGA-FC-7961 | 1.184211 |
| TCGA-2A-A8VV | 0.342105 |
| TCGA-J9-A52E | 0.815789 |
| TCGA-G9-6494 | 0.815789 |
| TCGA-J4-AAU2 | 0.526316 |

|              |          |
|--------------|----------|
| TCGA-KC-A7FE | 0.052632 |
| TCGA-YL-A8HL | 0.657895 |
| TCGA-V1-A9OX | 0.526316 |
| TCGA-EJ-7794 | 0.289474 |
| TCGA-HC-7210 | 1.105263 |
| TCGA-HC-7820 | 0.657895 |
| TCGA-V1-A8MM | 0.578947 |
| TCGA-XK-AAJA | 1.105263 |
| TCGA-HC-A8D1 | 0.578947 |
| TCGA-G9-A9S0 | 0.684211 |
| TCGA-G9-6379 | 0.605263 |
| TCGA-YL-A9WJ | 0.552632 |
| TCGA-VN-A88L | 0.289474 |
| TCGA-FC-A4JI | 0.973684 |
| TCGA-KC-A7FA | 0.894737 |
| TCGA-J4-A67O | 0.394737 |
| TCGA-EJ-5498 | 1        |
| TCGA-G9-6347 | 0.236842 |
| TCGA-J9-A52D | 1.131579 |
| TCGA-G9-6353 | 0.026316 |
| TCGA-EJ-A6RC | 0.131579 |
| TCGA-V1-A9OQ | 0.947368 |
| TCGA-EJ-7791 | 0.157895 |
| TCGA-XJ-A83F | 0.815789 |
| TCGA-KK-A7AU | 0.605263 |
| TCGA-ZG-A8QX | 0.736842 |
| TCGA-EJ-5507 | 0.842105 |
| TCGA-HI-7169 | 0.605263 |
| TCGA-ZG-A8QZ | 0.289474 |
| TCGA-VP-A87E | 0.289474 |
| TCGA-KK-A7AZ | 0.763158 |
| TCGA-J9-A8CL | 1.421053 |
| TCGA-HC-8266 | 0.5      |
| TCGA-HC-7747 | 0.394737 |
| TCGA-CH-5750 | 1.052632 |
| TCGA-KK-A8IM | 0.710526 |
| TCGA-EJ-7328 | 0.789474 |
| TCGA-YL-A8SK | 0.921053 |
| TCGA-EJ-7125 | 0.710526 |
| TCGA-EJ-5522 | 0.657895 |
| TCGA-EJ-7314 | 0.736842 |
| TCGA-HC-7231 | 0.815789 |
| TCGA-KK-A8IF | 0.710526 |

|              |          |
|--------------|----------|
| TCGA-EJ-5499 | 0.947368 |
| TCGA-V1-A9Z7 | 0.763158 |
| TCGA-KK-A6E6 | 0.973684 |
| TCGA-CH-5762 | 1.263158 |
| TCGA-YL-A8SA | 0.868421 |
| TCGA-EJ-A46F | 1        |
| TCGA-KK-A59Y | 0.631579 |
| TCGA-HC-7736 | 0.552632 |
| TCGA-J4-A83K | 0.552632 |
| TCGA-G9-6498 | 0.657895 |
| TCGA-VN-A88K | 0.736842 |
| TCGA-G9-7510 | 0.526316 |
| TCGA-CH-5771 | 0.5      |
| TCGA-EJ-7782 | 10.89474 |
| TCGA-EJ-5494 | 0.342105 |
| TCGA-CH-5737 | 1.315789 |
| TCGA-2A-A8VX | 0.842105 |
| TCGA-YL-A8SB | 0.605263 |
| TCGA-XJ-A9DQ | 0.078947 |
| TCGA-EJ-A7NF | 0.526316 |
| TCGA-CH-5788 | 0.947368 |
| TCGA-ZG-A9LM | 0.894737 |
| TCGA-XK-AAJT | 0.684211 |
| TCGA-G9-6348 | 0.973684 |
| TCGA-EJ-5527 | 0.578947 |
| TCGA-VN-A88I | 0.131579 |
| TCGA-HC-7742 | 0.921053 |
| TCGA-XK-AAK1 | 1.210526 |
| TCGA-VN-A943 | 0.578947 |
| TCGA-EJ-7331 | 0.631579 |
| TCGA-EJ-7788 | 0.947368 |
| TCGA-EJ-A65B | 0.394737 |
| TCGA-EJ-A7NK | 0.078947 |
| TCGA-EJ-5502 | 0.026316 |
| TCGA-EJ-7783 | 0.736842 |
| TCGA-G9-6343 | 0.394737 |
| TCGA-KK-A7AY | 1.210526 |
| TCGA-KK-A8IG | 0.657895 |
| TCGA-XA-A8JR | 0.421053 |
| TCGA-EJ-5506 | 0.052632 |
| TCGA-J4-8198 | 0.815789 |
| TCGA-HC-7212 | 0.421053 |
| TCGA-J4-A67K | 0.684211 |



|              |          |
|--------------|----------|
| TCGA-2A-AAYF | 0.657895 |
| TCGA-HC-8265 | 1.210526 |
| TCGA-QU-A6IO | 0.842105 |
| TCGA-J4-8200 | 0.368421 |
| TCGA-MG-AAMC | 0.631579 |
| TCGA-HC-8257 | 1.157895 |
| TCGA-VN-A88M | 0.315789 |
| TCGA-EJ-7318 | 0.578947 |
| TCGA-HC-7818 | 0.131579 |
| TCGA-J4-A83L | 0.342105 |
| TCGA-HC-A631 | 1.131579 |
| TCGA-VP-A87D | 1.210526 |
| TCGA-CH-5763 | 0.026316 |
| TCGA-KK-A6E3 | 0.289474 |
| TCGA-EJ-7792 | 0.421053 |
| TCGA-V1-A9OH | 1.157895 |
| TCGA-ZG-A9L5 | 1.184211 |
| TCGA-J9-A8CK | 0.605263 |
| TCGA-YL-A9WH | 1.578947 |
| TCGA-CH-5791 | 0.973684 |
| TCGA-ZG-A8QW | 0.763158 |
| TCGA-X4-A8KQ | 1.236842 |
| TCGA-Y6-A8TL | 0.657895 |
| TCGA-KK-A7B3 | 1.078947 |
| TCGA-CH-5743 | 0.026316 |
| TCGA-EJ-5526 | 0.894737 |
| TCGA-CH-5740 | 0.447368 |
| TCGA-ZG-A9L2 | 0.657895 |
| TCGA-CH-5764 | 0.605263 |
| TCGA-HC-A632 | 0.973684 |
| TCGA-V1-A8MG | 0.421053 |
| TCGA-KK-A6E4 | 1.052632 |
| TCGA-V1-A8WW | 0.894737 |
| TCGA-EJ-7312 | 0.710526 |
| TCGA-KK-A8I8 | 0.657895 |
| TCGA-QU-A6IL | 0.684211 |
| TCGA-KK-A8IH | 0.657895 |
| TCGA-2A-AAYU | 0.736842 |
| TCGA-ZG-A9MC | 0.315789 |
| TCGA-HC-A4ZV | 3.447368 |
| TCGA-G9-6338 | 0.736842 |
| TCGA-HC-7075 | 0.684211 |
| TCGA-EJ-7327 | 0.631579 |

|              |          |
|--------------|----------|
| TCGA-HC-7081 | 0.578947 |
| TCGA-V1-A9OT | 0.973684 |
| TCGA-VN-A88O | 0.657895 |
| TCGA-YL-A8HO | 0.631579 |
| TCGA-EJ-7330 | 1.078947 |
| TCGA-G9-7519 | 0.552632 |
| TCGA-G9-6369 | 0.684211 |
| TCGA-KK-A59Z | 1.394737 |
| TCGA-G9-6356 | 0.236842 |
| TCGA-HI-7170 | 0.710526 |
| TCGA-G9-6385 | 0.078947 |
| TCGA-HC-7752 | 0.684211 |
| TCGA-EJ-7123 | 1        |
| TCGA-ZG-A9L4 | 0.368421 |
| TCGA-EJ-8468 | 0.631579 |
| TCGA-ZG-A8QY | 1.736842 |
| TCGA-EJ-7785 | 0.5      |
| TCGA-ZG-A9LB | 1.342105 |
| TCGA-EJ-A65E | 1.052632 |
| TCGA-G9-7521 | 0.815789 |
| TCGA-VP-AA1N | 0.921053 |
| TCGA-J4-AATZ | 0.842105 |
| TCGA-HC-8264 | 0.973684 |
| TCGA-ZG-A9N3 | 1.473684 |
| TCGA-WW-A8ZI | 0.842105 |
| TCGA-HC-7213 | 0.815789 |
| TCGA-KK-A6DY | 0.657895 |
| TCGA-M7-A724 | 0.842105 |
| TCGA-HC-7749 | 1.105263 |
| TCGA-2A-A8W1 | 0.526316 |
| TCGA-HC-7233 | 0.789474 |
| TCGA-J9-A52B | 0.921053 |
| TCGA-HC-7748 | 0.578947 |
| TCGA-CH-5741 | 0.526316 |
| TCGA-ZG-A9LS | 0.789474 |
| TCGA-G9-6342 | 0.552632 |
| TCGA-EJ-A7NM | 1.552632 |
| TCGA-KC-A4BV | 0.894737 |
| TCGA-KC-A7F3 | 0.736842 |
| TCGA-EJ-A7NG | 0.026316 |
| TCGA-HC-A6HY | 0.657895 |
| TCGA-ZG-A9NI | 2.210526 |
| TCGA-H9-A6BY | 0.710526 |

|              |          |
|--------------|----------|
| TCGA-ZG-A9L0 | 1.131579 |
| TCGA-EJ-5495 | 2        |
| TCGA-FC-A6HD | 0.842105 |
| TCGA-KK-A59X | 1.473684 |
| TCGA-EJ-A7NH | 0.421053 |
| TCGA-J4-A67L | 0.684211 |
| TCGA-HC-7745 | 0.631579 |
| TCGA-HC-7740 | 0.342105 |
| TCGA-YL-A9WK | 0.552632 |
| TCGA-V1-A8MJ | 0.342105 |
| TCGA-EJ-5508 | 0.473684 |
| TCGA-QU-A6IM | 1.763158 |
| TCGA-EJ-5542 | 0.526316 |
| TCGA-ZG-A9L6 | 0.605263 |
| TCGA-YL-A9WX | 0.184211 |
| TCGA-VP-A87J | 0.763158 |
| TCGA-KK-A8I9 | 0.815789 |
| TCGA-KK-A8I4 | 0.5      |
| TCGA-G9-6363 | 0.868421 |
| TCGA-YL-A8SH | 0.763158 |
| TCGA-G9-6329 | 0.578947 |
| TCGA-EJ-7315 | 0.631579 |
| TCGA-V1-A8WL | 0.868421 |
| TCGA-HC-7080 | 0.921053 |
| TCGA-HC-7232 | 0.763158 |
| TCGA-EJ-7797 | 0.421053 |
| TCGA-EJ-5518 | 1.052632 |
| TCGA-VP-A878 | 0.894737 |
| TCGA-H9-7775 | 0.815789 |
| TCGA-J4-A83M | 0.657895 |
| TCGA-KC-A4BL | 0.052632 |
| TCGA-EJ-7115 | 1.210526 |
| TCGA-EJ-5531 | 0.578947 |
| TCGA-FC-7708 | 0.526316 |
| TCGA-ZG-A9ND | 0.815789 |
| TCGA-G9-7509 | 0.342105 |
| TCGA-HC-7744 | 0.657895 |
| TCGA-CH-5769 | 1.342105 |
| TCGA-HC-7211 | 0.421053 |
| TCGA-KK-A7B2 | 0.052632 |
| TCGA-XK-AAIV | 1.026316 |
| TCGA-VN-A88Q | 1.026316 |
| TCGA-J4-A83I | 0.736842 |

|  |              |          |
|--|--------------|----------|
|  | TCGA-TK-A8OK | 1.157895 |
|  | TCGA-J4-A83J | 1.236842 |
|  | TCGA-V1-A8MU | 0.842105 |
|  | TCGA-V1-A8WS | 0.578947 |
|  | TCGA-EJ-5514 | 0.973684 |
|  | TCGA-XJ-A83G | 0.763158 |
|  | TCGA-V1-A9OF | 0.342105 |
|  | TCGA-YL-A8S8 | 1.131579 |
|  | TCGA-CH-5753 | 1.078947 |
|  | TCGA-YL-A8SR | 0.578947 |
|  | TCGA-CH-5790 | 0.289474 |
|  | TCGA-KK-A7AV | 0.368421 |
|  | TCGA-V1-A9Z8 | 0.526316 |
|  | TCGA-G9-6336 | 0.447368 |
|  | TCGA-G9-6336 | 0.447368 |
