# Supplementary material
Source: publisher site journal article supplement (https://static.cambridge.org/content/id/urn%3Acambridge.org%3Aid%3Aarticle%3AS001667230050072X/resource/name/S001667230050072Xsupp001.zip)
Supplement: Supplementary file 3 [file S001667230050072Xsupp001.zip]

| Supplementary Data4-1:DElncRNAs           |                    |                    |                |          |  |
|-------------------------------------------|--------------------|--------------------|----------------|----------|--|
| gene                                      | mean of LRBM group | mean of HRBM group | log2FoldChange | padj     |  |
| AC018816.1 ENSG00000235978 antisense      | 34.75661           | 202.1529           | 2.540243       | 6.66E-30 |  |
| AC023301.1 ENSG00000265579 sense_intronic | 6.909692           | 83.73592           | 3.082113       | 4.78E-19 |  |
| BHLHE40-AS1 ENSG00000235831 antisense     | 57.72646           | 160.2995           | 1.040438       | 4.76E-14 |  |
| AC245014.3 ENSG00000276216 lincRNA        | 10.27128           | 21.59696           | 1.067938       | 1.58E-13 |  |
| LINC01141 ENSG00000236963 lincRNA         | 2.117838           | 7.083595           | 1.718817       | 1.79E-13 |  |
| AC093904.4 ENSG00000261104 lincRNA        | 3.71679            | 15.53514           | 2.051828       | 8.80E-13 |  |
| AC084346.2 ENSG00000264448 lincRNA        | 3.390334           | 8.371495           | 1.303698       | 1.81E-12 |  |
| AC022098.3 ENSG00000267783 antisense      | 3.246762           | 7.251891           | 1.176909       | 5.31E-12 |  |
| NAALADL2-AS2 ENSG00000226779 antisense    | 9.918371           | 31.54555           | 2.09173        | 1.38E-11 |  |
| AC002456.1 ENSG00000223969 antisense      | 27.87736           | 57.18676           | 1.032316       | 1.38E-11 |  |
| AC104076.1 ENSG00000236153 antisense      | 3.291124           | 9.124494           | 1.476659       | 3.12E-11 |  |
| AC093001.1 ENSG00000244468 antisense      | 572.3692           | 529.9721           | 1.640703       | 1.10E-10 |  |
| AC117382.2 ENSG00000261758 antisense      | 3.25067            | 11.03319           | 1.218317       | 2.37E-10 |  |
| AC010186.1 ENSG00000256442 antisense      | 0.944529           | 2.987325           | 1.696759       | 2.62E-10 |  |
| AL353753.1 ENSG00000276759 lincRNA        | 8.824984           | 86.65824           | 3.57264        | 5.04E-10 |  |
| LINC01612 ENSG00000250266 lincRNA         | 5.270339           | 33.06912           | 2.650708       | 5.39E-10 |  |
| AC004233.4 ENSG00000274367 lincRNA        | 1.15924            | 2.946534           | 1.355113       | 5.46E-10 |  |
| AL109615.2 ENSG00000231881 lincRNA        | 0.456037           | 1.835784           | 1.925238       | 5.79E-10 |  |
| LINC02544 ENSG00000261039 lincRNA         | 1.660636           | 2.093742           | 1.592711       | 6.45E-10 |  |
| AL445490.1 ENSG00000225886 antisense      | 4.493652           | 13.41467           | 1.58039        | 6.83E-10 |  |

|                                                 |          |          |          |          |
|-------------------------------------------------|----------|----------|----------|----------|
| TERC ENSG00000270141 lincRNA                    | 0.71504  | 2.446127 | 1.798436 | 1.09E-09 |
| BX284668.6 ENSG00000272426 lincRNA              | 3.293129 | 7.214394 | 1.136882 | 2.45E-09 |
| AC005041.3 ENSG00000272183 antisense            | 2.517535 | 5.443076 | 1.109396 | 3.20E-09 |
| AC098818.2 ENSG00000260278 antisense            | 1.233542 | 3.438975 | 1.505091 | 3.43E-09 |
| KRTAP5-AS1 ENSG00000233930 antisense            | 23.02781 | 46.13981 | 1.005365 | 4.63E-09 |
| NRIR ENSG00000225964 antisense                  | 4.546162 | 9.919155 | 1.134255 | 5.79E-09 |
| AC015849.5 ENSG00000270977 lincRNA              | 4.163002 | 9.096438 | 1.101872 | 7.12E-09 |
| LINC00482 ENSG00000185168 lincRNA               | 15.98309 | 36.82107 | 1.20551  | 1.19E-08 |
| AC017074.1 ENSG00000227359 lincRNA              | 36.3647  | 107.2414 | 1.06892  | 2.75E-08 |
| AL032819.1 ENSG00000260132 antisense            | 2.315696 | 5.208488 | 1.177126 | 2.75E-08 |
| LINC01614 ENSG00000230838 lincRNA               | 8.840563 | 8.555733 | 1.13946  | 2.84E-08 |
| AP001625.3 ENSG00000239930 sense_intronic       | 2.909893 | 7.547679 | 1.106394 | 2.89E-08 |
| AL645608.8 ENSG00000273443 lincRNA              | 2.042168 | 5.007897 | 1.29397  | 3.02E-08 |
| AC106028.5 ENSG00000275175 lincRNA              | 0.980378 | 2.748575 | 1.525764 | 3.02E-08 |
| LINC01833 ENSG00000259439 lincRNA               | 0.390021 | 1.698497 | 2.000266 | 3.26E-08 |
| AC091138.1 ENSG00000263958 lincRNA              | 0.525235 | 4.825675 | 2.575591 | 5.66E-08 |
| AC093904.2 ENSG00000242136 processed_transcript | 1.027144 | 3.560857 | 1.777232 | 6.13E-08 |
| AP001476.1 ENSG00000224413 lincRNA              | 11.44329 | 28.20428 | 1.291792 | 9.21E-08 |
| AC004835.1 ENSG00000230392 lincRNA              | 0.446939 | 1.670109 | 1.863703 | 1.20E-07 |
| AC083843.1 ENSG00000254028 lincRNA              | 2.320131 | 4.792195 | 1.052736 | 1.22E-07 |
| AC125603.2 ENSG00000257883 lincRNA              | 2.562687 | 6.693219 | 1.374228 | 2.14E-07 |
| AL133163.3 ENSG00000259017 lincRNA              | 5.358478 | 14.05529 | 1.386963 | 2.40E-07 |

|                                              |          |          |          |              |
|----------------------------------------------|----------|----------|----------|--------------|
| AC105219.1 ENSG00000254548 antisen<br>se     | 2.458265 | 6.042513 | 1.319915 | 4.60E-<br>07 |
| AL109615.3 ENSG00000237686 antisen<br>se     | 8.534421 | 17.14687 | 1.001996 | 4.95E-<br>07 |
| LINC02512 ENSG00000251061 lincRNA            | 0.792019 | 7.431382 | 2.684898 | 6.13E-<br>07 |
| AP005230.1 ENSG00000263745 lincRN<br>A       | 1.747004 | 3.068884 | 1.304429 | 6.43E-<br>07 |
| AC073316.1 ENSG00000217455 lincRN<br>A       | 2.290347 | 8.103575 | 1.829307 | 6.43E-<br>07 |
| AC093895.1 ENSG00000249001 antisen<br>se     | 1.235623 | 3.02226  | 2.26254  | 1.15E-<br>06 |
| AC092535.3 ENSG00000251652 antisen<br>se     | 5.776653 | 12.04184 | 1.072123 | 1.17E-<br>06 |
| AC009336.1 ENSG00000272729 antisen<br>se     | 1.700275 | 3.650186 | 1.106357 | 1.32E-<br>06 |
| AC020907.3 ENSG00000269303 antisen<br>se     | 1.475215 | 2.924361 | 1.032764 | 1.76E-<br>06 |
| AC008574.1 ENSG00000251293 lincRN<br>A       | 0.322737 | 2.824159 | 2.223444 | 1.87E-<br>06 |
| AL451065.1 ENSG00000223446 antisen<br>se     | 0.242986 | 3.029629 | 2.989464 | 2.33E-<br>06 |
| AP006216.1 ENSG00000226645 antisen<br>se     | 0.862138 | 1.690322 | 1.020358 | 2.93E-<br>06 |
| AL353803.4 ENSG00000261334 lincRNA           | 1.277491 | 6.298743 | 1.332763 | 3.14E-<br>06 |
| FEZF1-AS1 ENSG00000230316 antisens<br>e      | 17.81723 | 36.82177 | 1.04677  | 4.50E-<br>06 |
| AL391427.1 ENSG00000224251 antisen<br>se     | 1.064008 | 2.435334 | 1.176898 | 4.61E-<br>06 |
| DSCR8 ENSG00000198054 lincRNA                | 0.493289 | 8.877932 | 2.95569  | 4.67E-<br>06 |
| AP003472.1 ENSG00000253824 lincRN<br>A       | 0.952918 | 2.248711 | 1.292831 | 9.22E-<br>06 |
| KCNH1-IT1 ENSG00000234233 sense_in<br>tronic | 0.656927 | 1.745627 | 1.407144 | 9.53E-<br>06 |
| AC015813.3 ENSG00000266290 lincRN<br>A       | 0.571443 | 1.837382 | 1.364229 | 1.37E-<br>05 |
| LINC01497 ENSG00000237560 lincRNA            | 2.446534 | 5.043928 | 1.072253 | 1.81E-<br>05 |
| AC010967.1 ENSG00000228033 lincRN<br>A       | 1.134926 | 2.666425 | 1.236571 | 2.06E-<br>05 |
| AC011352.3 ENSG00000251320 antisen<br>se     | 2.216404 | 5.299692 | 1.255581 | 2.18E-<br>05 |

|                                                  |          |          |          |              |
|--------------------------------------------------|----------|----------|----------|--------------|
| AC011352.1 ENSG00000248362 antisen<br>se         | 1.356612 | 3.396567 | 1.324719 | 2.44E-<br>05 |
| AC025575.2 ENSG00000258053 lincRN<br>A           | 2.507681 | 5.410305 | 1.079021 | 2.54E-<br>05 |
| LINC02100 ENSG00000248693 lincRNA                | 1.173963 | 2.579605 | 1.083735 | 3.08E-<br>05 |
| AC010894.3 ENSG00000236449 antisen<br>se         | 8.801333 | 25.06289 | 1.294718 | 3.18E-<br>05 |
| LINC02200 ENSG00000250358 lincRNA                | 1.323802 | 3.417358 | 1.356764 | 3.65E-<br>05 |
| AC009478.1 ENSG00000225258 lincRN<br>A           | 31.87299 | 68.73347 | 1.108774 | 3.85E-<br>05 |
| AC078923.1 ENSG00000258077 lincRN<br>A           | 0.508598 | 1.604277 | 1.691746 | 4.03E-<br>05 |
| AC069228.1 ENSG00000258162 antisen<br>se         | 104.4757 | 316.2888 | 1.598722 | 4.73E-<br>05 |
| AL391845.2 ENSG00000233542 antisen<br>se         | 1.697071 | 3.52261  | 1.063079 | 5.61E-<br>05 |
| AC092894.1 ENSG00000243081 lincRN<br>A           | 1.596991 | 12.04932 | 1.238907 | 6.28E-<br>05 |
| AC061975.6 ENSG00000266830 lincRN<br>A           | 1.206687 | 2.892653 | 1.230207 | 6.67E-<br>05 |
| ELDR ENSG00000280890 lincRNA                     | 0.796079 | 1.669719 | 1.076253 | 8.03E-<br>05 |
| AC061975.1 ENSG00000260777 lincRN<br>A           | 0.935227 | 3.710201 | 1.006505 | 9.01E-<br>05 |
| BARX1-DT ENSG00000235601 lincRNA                 | 0.318116 | 1.17068  | 1.742462 | 9.71E-<br>05 |
| LINC01647 ENSG00000235643 lincRNA                | 0.567215 | 3.424641 | 1.60115  | 0.0001<br>02 |
| AC092598.1 ENSG00000223523 sense_<br>overlapping | 2.613606 | 8.20152  | 1.240417 | 0.0001<br>03 |
| SCHLAP1 ENSG00000281131 lincRNA                  | 392.8384 | 981.1847 | 1.320598 | 0.0001<br>04 |
| LINC01551 ENSG00000186960 lincRNA                | 1.05174  | 4.193611 | 1.890539 | 0.0001<br>19 |
| AC110813.1 ENSG00000249690 antisen<br>se         | 1.644121 | 5.968172 | 1.055446 | 0.0001<br>56 |
| MIR2052HG ENSG00000254349 lincRN<br>A            | 58.80805 | 126.475  | 1.103155 | 0.0001<br>74 |
| AC026726.1 ENSG00000249483 lincRN<br>A           | 0.914457 | 1.844853 | 1.045832 | 0.0002<br>43 |
| AC131902.1 ENSG00000253369 lincRN<br>A           | 58.52327 | 104.6274 | 1.13092  | 0.0002<br>43 |

|                                                |          |          |          |          |
|------------------------------------------------|----------|----------|----------|----------|
| AC116345.1 ENSG00000249743 lincRNA             | 1.765773 | 3.92809  | 1.15459  | 0.000276 |
| AC106772.2 ENSG00000250385 antisense           | 0.812825 | 2.595326 | 1.712578 | 0.000283 |
| LAMP5-AS1 ENSG00000225988 antisense            | 3.058746 | 7.562233 | 1.176344 | 0.000325 |
| LINC02201 ENSG00000251538 lincRNA              | 0.440446 | 1.139505 | 1.257308 | 0.000332 |
| AP002759.1 ENSG00000255178 lincRNA             | 0.328501 | 1.271815 | 1.849651 | 0.000365 |
| LINC02197 ENSG00000250387 lincRNA              | 8.9878   | 20.94546 | 1.218704 | 0.0004   |
| AL021395.1 ENSG00000233508 lincRNA             | 17.6817  | 40.69744 | 1.204973 | 0.000401 |
| AL121906.1 ENSG00000271803 antisense           | 0.482603 | 1.029283 | 1.114903 | 0.000415 |
| ZFPM2-AS1 ENSG00000251003 processed_transcript | 1.506563 | 3.272954 | 1.05248  | 0.000503 |
| AC092920.1 ENSG00000232461 lincRNA             | 0.866729 | 1.892167 | 1.119301 | 0.000513 |
| AC010132.1 ENSG00000231539 lincRNA             | 0.767049 | 3.342699 | 2.164534 | 0.000537 |
| LINC00536 ENSG00000249917 lincRNA              | 0.469769 | 1.02928  | 1.11142  | 0.000578 |
| WASIR1 ENSG00000185203 antisense               | 1.675163 | 3.879355 | 1.198844 | 0.000613 |
| AC008109.1 ENSG00000266602 lincRNA             | 0.44807  | 1.272422 | 1.899328 | 0.000731 |
| KCNMB2-AS1 ENSG00000237978 antisense           | 16.92109 | 36.31916 | 1.097431 | 0.000808 |
| AC087379.2 ENSG00000254695 lincRNA             | 1.277437 | 6.662298 | 1.797145 | 0.000848 |
| AL596442.1 ENSG00000232197 antisense           | 1.00686  | 3.291548 | 1.697834 | 0.000871 |
| AC093673.2 ENSG00000272619 lincRNA             | 0.466353 | 1.749009 | 1.303243 | 0.000945 |
| AC009139.1 ENSG00000260922 antisense           | 0.542523 | 1.283472 | 1.280843 | 0.001005 |
| AC141424.1 ENSG00000241525 antisense           | 0.658086 | 1.302336 | 1.001179 | 0.001014 |
| AC008897.2 ENSG00000247372 antisense           | 0.581043 | 1.16863  | 1.024299 | 0.001099 |
| LINC01446 ENSG00000205628 lincRNA              | 3.168834 | 8.163633 | 1.694825 | 0.001119 |

|                                                 |          |          |          |          |
|-------------------------------------------------|----------|----------|----------|----------|
| AC092131.1 ENSG00000259846 lincRNA              | 0.713509 | 1.512516 | 1.039322 | 0.001149 |
| AC017074.2 ENSG00000233479 lincRNA              | 0.319972 | 1.46787  | 2.062344 | 0.001153 |
| AC024559.2 ENSG00000276407 lincRNA              | 0.304632 | 0.762996 | 1.193162 | 0.00134  |
| AL022725.1 ENSG00000236336 antisense            | 0.34793  | 0.986533 | 1.362257 | 0.001345 |
| AC104564.4 ENSG00000264647 antisense            | 1.135951 | 2.345188 | 1.033182 | 0.001379 |
| AL591468.1 ENSG00000226004 lincRNA              | 0.523508 | 1.066902 | 1.060856 | 0.001622 |
| AL136537.2 ENSG00000261761 processed_transcript | 1.040884 | 10.54705 | 2.406984 | 0.001669 |
| AL442224.1 ENSG00000231990 lincRNA              | 0.641586 | 1.51954  | 1.250652 | 0.001694 |
| AC040914.1 ENSG00000254372 antisense            | 0.451864 | 0.899099 | 1.03704  | 0.00173  |
| AC069277.1 ENSG00000189229 lincRNA              | 2.080556 | 5.308855 | 1.541657 | 0.00176  |
| PPFIA2-AS1 ENSG00000257467 lincRNA              | 14.1842  | 29.82897 | 1.07165  | 0.001786 |
| AC104350.1 ENSG00000253523 lincRNA              | 0.472803 | 1.035138 | 1.092637 | 0.002055 |
| GS1-594A7.3 ENSG00000225833 antisense           | 1.436066 | 2.268685 | 1.208306 | 0.002243 |
| AC020934.2 ENSG00000267735 antisense            | 0.340846 | 0.732796 | 1.033303 | 0.002358 |
| AC009908.1 ENSG00000253513 antisense            | 0.30401  | 0.744667 | 1.156941 | 0.002722 |
| CR392039.3 ENSG00000279501 lincRNA              | 0.439549 | 1.9246   | 1.692613 | 0.003179 |
| AC024132.3 ENSG00000251325 lincRNA              | 0.496985 | 1.682231 | 1.267552 | 0.003263 |
| AC092435.1 ENSG00000248346 lincRNA              | 0.24377  | 0.733256 | 1.282875 | 0.003485 |
| LINC02398 ENSG00000256287 lincRNA               | 0.822195 | 1.69705  | 1.070444 | 0.0042   |
| AC005786.2 ENSG00000267231 lincRNA              | 0.378605 | 0.772805 | 1.092034 | 0.004413 |
| AC078955.1 ENSG00000258026 antisense            | 0.500856 | 1.091392 | 1.068314 | 0.004445 |
| AC008554.1 ENSG00000269043 lincRNA              | 0.509949 | 1.109462 | 1.004373 | 0.004467 |

|                                      |          |          |          |          |
|--------------------------------------|----------|----------|----------|----------|
| AL596325.1 ENSG00000259788 antisense | 0.309635 | 1.185439 | 1.222954 | 0.004952 |
| AC106712.1 ENSG00000241280 lincRNA   | 0.591426 | 1.276926 | 1.107401 | 0.005022 |
| AC022392.1 ENSG00000272988 lincRNA   | 0.537609 | 0.738664 | 1.150199 | 0.00517  |
| AC083801.2 ENSG00000260377 lincRNA   | 0.27766  | 0.684298 | 1.153363 | 0.006059 |
| AC099509.1 ENSG00000249746 lincRNA   | 0.451643 | 1.512606 | 1.281816 | 0.00644  |
| MIR137HG ENSG00000225206 lincRNA     | 5.421167 | 39.04508 | 1.655922 | 0.007169 |
| DSCR4 ENSG00000184029 lincRNA        | 0.116279 | 1.136475 | 2.052426 | 0.008638 |
| AC007128.2 ENSG00000272328 lincRNA   | 1.384507 | 3.652707 | 1.383195 | 0.009048 |
| AL157778.1 ENSG00000281566 lincRNA   | 0.291009 | 1.501526 | 2.113233 | 0.009208 |
| AP000943.1 ENSG00000233536 lincRNA   | 0.675868 | 1.209258 | 1.184365 | 0.009215 |
| Z97206.2 ENSG00000237567 lincRNA     | 49.73662 | 74.94323 | 1.153517 | 0.010136 |
| AL122019.1 ENSG00000227579 lincRNA   | 0.724226 | 1.565383 | 1.099784 | 0.01045  |
| LINC02466 ENSG00000246876 lincRNA    | 0.904295 | 2.582322 | 1.49998  | 0.010575 |
| AC103843.1 ENSG00000255101 antisense | 0.502981 | 1.089753 | 1.050555 | 0.01098  |
| AL157387.1 ENSG00000234918 lincRNA   | 11.51404 | 33.32962 | 1.684542 | 0.011706 |
| LINC02163 ENSG00000251026 lincRNA    | 3.818454 | 11.05466 | 1.533875 | 0.011825 |
| AC078820.1 ENSG00000258088 lincRNA   | 0.247192 | 0.755281 | 1.29673  | 0.012362 |
| AC112493.1 ENSG00000242021 lincRNA   | 1.625251 | 3.665025 | 1.15229  | 0.014532 |
| AC096734.1 ENSG00000251517 lincRNA   | 0.315943 | 1.008444 | 1.125227 | 0.014914 |
| AC107419.1 ENSG00000228933 lincRNA   | 5.122481 | 10.94769 | 1.088643 | 0.016186 |
| AP000769.3 ENSG00000279243 lincRNA   | 0.453668 | 0.984463 | 1.066421 | 0.017935 |
| TLX1NB ENSG00000236311 lincRNA       | 0.24648  | 0.720146 | 1.167428 | 0.018301 |

|                                                     |          |          |          |              |
|-----------------------------------------------------|----------|----------|----------|--------------|
| AL117382.1 ENSG00000226812 antisen<br>se            | 0.219496 | 0.620734 | 1.200498 | 0.0188<br>44 |
| AC010595.1 ENSG00000250874 lincRN<br>A              | 0.248807 | 1.076083 | 1.734134 | 0.0206<br>17 |
| LINC01214 ENSG00000243550 lincRNA                   | 0.328079 | 0.765471 | 1.06404  | 0.0207<br>74 |
| BX005019.1 ENSG00000259946 lincRNA                  | 0.289252 | 1.361166 | 1.666793 | 0.0209<br>25 |
| AP003550.1 ENSG00000254236 antisen<br>se            | 0.128616 | 0.603728 | 1.455329 | 0.0209<br>72 |
| AC019103.1 ENSG00000250259 lincRN<br>A              | 0.18692  | 0.738366 | 1.55238  | 0.0244<br>81 |
| Z82214.2 ENSG00000236272 antisense                  | 0.247979 | 0.72868  | 1.275493 | 0.0251<br>27 |
| AP005121.1 ENSG00000263618 lincRN<br>A              | 0.929192 | 1.159012 | 1.495331 | 0.0260<br>32 |
| AC128709.2 ENSG00000235126 lincRN<br>A              | 0.154838 | 0.532751 | 1.196756 | 0.0265<br>99 |
| AC098934.4 ENSG00000260021 antisen<br>se            | 0.196401 | 0.813491 | 1.17912  | 0.0340<br>18 |
| LINC01632 ENSG00000277199 lincRNA                   | 0.436626 | 1.583871 | 1.365521 | 0.0397       |
| AC104831.1 ENSG00000242790 lincRN<br>A              | 1.221095 | 4.345699 | 1.069961 | 0.0464<br>68 |
| AC103808.6 ENSG00000266743 lincRN<br>A              | 0.510027 | 1.193004 | 1.150721 | 0.0468<br>2  |
| AL354863.1 ENSG00000238276 process<br>ed_transcript | 7.71649  | 12.86649 | 1.236258 | 0.0469<br>57 |
| AC020571.1 ENSG00000229056 antisen<br>se            | 1109.242 | 527.3623 | -1.07286 | 1.79E-<br>13 |
| AC010327.3 ENSG00000267577 antisen<br>se            | 25.59962 | 9.586386 | -2.62403 | 1.47E-<br>10 |
| RMDN2-AS1 ENSG00000235848 antisen<br>se             | 22.42528 | 9.515616 | -1.23304 | 2.62E-<br>10 |
| AL031663.3 ENSG00000277022 lincRNA                  | 18.45962 | 7.749175 | -1.24231 | 4.97E-<br>10 |
| AGBL1-AS1 ENSG00000260125 antisens<br>e             | 6.906444 | 5.69764  | -2.10579 | 5.25E-<br>08 |
| FP671120.3 ENSG00000280800 lincRNA                  | 16.10485 | 0.387636 | -2.8461  | 2.34E-<br>07 |
| AC147651.1 ENSG00000229380 antisen<br>se            | 6.029871 | 2.557739 | -1.22474 | 3.70E-<br>07 |
| LINC01698 ENSG00000231648 lincRNA                   | 13.32582 | 10.09252 | -1.5341  | 4.98E-<br>07 |



|                                           |          |          |          |          |
|-------------------------------------------|----------|----------|----------|----------|
| AC026469.1 ENSG00000275088 lincRNA        | 10.95408 | 4.1922   | -1.07421 | 1.87E-06 |
| AL354714.1 ENSG00000198358 antisense      | 4.872881 | 3.17182  | -1.01611 | 4.84E-06 |
| AC104137.1 ENSG00000248479 lincRNA        | 11.13705 | 5.355268 | -1.05506 | 4.87E-06 |
| LINC02055 ENSG00000254101 lincRNA         | 6.569701 | 3.053603 | -1.86353 | 1.06E-05 |
| AC116025.1 ENSG00000261978 antisense      | 6.4199   | 3.113259 | -1.05774 | 1.77E-05 |
| AC007750.1 ENSG00000236841 antisense      | 148.6496 | 64.71382 | -1.19953 | 1.96E-05 |
| AP002478.2 ENSG00000266513 sense_intronic | 1.279814 | 0.440984 | -1.55208 | 2.64E-05 |
| LINC02120 ENSG00000248279 lincRNA         | 22.40922 | 6.704046 | -1.41957 | 2.94E-05 |
| AC018358.1 ENSG00000281160 antisense      | 3.597481 | 1.580827 | -1.17971 | 4.45E-05 |
| AP001269.2 ENSG00000267079 lincRNA        | 1.861281 | 0.84653  | -1.1158  | 5.03E-05 |
| AL449403.2 ENSG00000275465 lincRNA        | 14.42162 | 6.521651 | -1.14293 | 6.57E-05 |
| AC113192.1 ENSG00000254619 lincRNA        | 1.306743 | 0.419279 | -1.70828 | 7.45E-05 |
| AC246817.2 ENSG00000254319 lincRNA        | 28.07094 | 19.26867 | -1.13376 | 9.71E-05 |
| AP001094.3 ENSG00000266149 antisense      | 20.43386 | 10.21921 | -1.00176 | 0.000124 |
| AC084816.1 ENSG00000256995 lincRNA        | 1.412549 | 0.551978 | -1.32521 | 0.000176 |
| AL138881.1 ENSG00000228793 lincRNA        | 36.16108 | 17.20624 | -1.16974 | 0.000271 |
| LINC01187 ENSG00000249601 lincRNA         | 10.37152 | 6.845305 | -1.28066 | 0.000296 |
| C17orf77 ENSG00000182352 antisense        | 9.561159 | 6.567937 | -1.44085 | 0.000415 |
| AC113192.4 ENSG00000255169 lincRNA        | 2.665437 | 1.087269 | -1.31341 | 0.000452 |
| LINC01139 ENSG00000215808 lincRNA         | 23.78963 | 11.11883 | -1.09643 | 0.000494 |
| U95743.1 ENSG00000262267 lincRNA          | 5.207668 | 2.196374 | -1.23131 | 0.000597 |
| LINC02064 ENSG00000248391 lincRNA         | 1.896448 | 0.777163 | -1.25063 | 0.000599 |

|                                                 |          |          |          |          |
|-------------------------------------------------|----------|----------|----------|----------|
| LINC01344 ENSG00000228918 lincRNA               | 2.124751 | 1.036982 | -1.0448  | 0.000685 |
| LINC02199 ENSG00000250198 lincRNA               | 0.977953 | 0.708383 | -1.56998 | 0.00089  |
| LINC00336 ENSG00000197251 lincRNA               | 1.150679 | 0.55006  | -1.08443 | 0.001159 |
| AL158066.1 ENSG00000217576 processed_transcript | 1.2502   | 0.59452  | -1.2113  | 0.001177 |
| LINC01343 ENSG00000237290 lincRNA               | 0.766622 | 0.344418 | -1.10595 | 0.001531 |
| AC093496.1 ENSG00000255021 lincRNA              | 30.45638 | 3.704583 | -1.64847 | 0.002421 |
| C5orf17 ENSG00000248874 lincRNA                 | 38.54037 | 19.63957 | -1.2739  | 0.002613 |
| MIR1-1HG ENSG00000174407 antisense              | 23.48873 | 8.743009 | -1.00227 | 0.002839 |
| AC097713.1 ENSG00000228162 lincRNA              | 1.597669 | 0.731093 | -1.11449 | 0.00369  |
| AC015878.1 ENSG00000265751 antisense            | 4.392856 | 1.531044 | -2.38225 | 0.004412 |
| LINC01661 ENSG00000237460 lincRNA               | 0.79767  | 0.387757 | -1.03229 | 0.006121 |
| AC121342.1 ENSG00000233403 lincRNA              | 4.164669 | 1.640698 | -1.12918 | 0.006589 |
| PCAT5 ENSG00000280719 lincRNA                   | 41.3794  | 19.20383 | -1.10597 | 0.007802 |
| AC098936.1 ENSG00000224717 lincRNA              | 0.754084 | 0.32494  | -1.00337 | 0.009208 |
| AL356277.3 ENSG00000272243 lincRNA              | 6.642004 | 2.712351 | -1.29295 | 0.01192  |
| AC009142.1 ENSG00000261410 antisense            | 1.216266 | 0.550181 | -1.06947 | 0.014504 |
| AL157414.1 ENSG00000203266 lincRNA              | 0.863688 | 0.404731 | -1.03572 | 0.016186 |
| LINC02270 ENSG00000251210 lincRNA               | 0.648485 | 0.175739 | -1.24702 | 0.023368 |
| AL161431.1 ENSG00000275216 lincRNA              | 1.784306 | 0.590855 | -1.14493 | 0.02393  |
| LINC01581 ENSG00000259724 lincRNA               | 1.491329 | 0.611203 | -1.08724 | 0.027237 |
| AL355596.1 ENSG00000259828 lincRNA              | 1.827645 | 1.312202 | -1.02781 | 0.032676 |
| LINC01405 ENSG00000185847 lincRNA               | 29.28531 | 12.18328 | -1.35348 | 0.038296 |

|                                    |          |          |          |         |
|------------------------------------|----------|----------|----------|---------|
| AL391704.1 ENSG00000224750 lincRNA | 1.387418 | 1.358059 | -1.02264 | 0.04607 |
|------------------------------------|----------|----------|----------|---------|

| Supplementary Data4-2:DEmiRNAs |                    |                    |                |          |
|--------------------------------|--------------------|--------------------|----------------|----------|
| gene                           | mean of LRBM group | mean of HRBM group | log2FoldChange | padj     |
| hsa-mir-210                    | 261.2413           | 689.144            | 1.399289       | 8.62E-17 |
| hsa-mir-592                    | 5.584297           | 22.13319           | 1.331864       | 8.83E-11 |
| hsa-mir-653                    | 7.418493           | 11.73756           | 0.664891       | 7.88E-10 |
| hsa-mir-5680                   | 2.816552           | 5.569482           | 0.991199       | 7.38E-09 |
| hsa-mir-137                    | 7.194244           | 25.86411           | 2.121851       | 1.63E-08 |
| hsa-mir-3614                   | 2.251066           | 3.466262           | 0.63135        | 0.000459 |
| hsa-mir-7156                   | 0.696134           | 1.472423           | 1.090436       | 0.000578 |
| hsa-mir-4664                   | 0.509845           | 0.95362            | 0.930596       | 0.002506 |
| hsa-mir-767                    | 1.240424           | 2.226141           | 1.269525       | 0.004606 |
| hsa-mir-449a                   | 5.466919           | 9.52474            | 1.162333       | 0.005975 |
| hsa-mir-4501                   | 0.844114           | 1.382606           | 0.769029       | 0.017915 |
| hsa-mir-612                    | 0.91548            | 1.189156           | 1.075234       | 0.020103 |
| hsa-mir-4636                   | 0.394895           | 0.649005           | 0.591864       | 0.035013 |
| hsa-mir-105-1                  | 0.786305           | 2.100403           | 0.928557       | 0.03736  |
| hsa-mir-3662                   | 0.29997            | 0.628479           | 0.686214       | 0.04795  |
| hsa-mir-5002                   | 0.350238           | 0.586783           | 0.642352       | 0.049071 |
| hsa-mir-4766                   | 0.469455           | 0.769493           | 0.629902       | 0.049951 |
| hsa-mir-184                    | 9.460701           | 6.212005           | -1.48424       | 5.94E-09 |
| hsa-mir-133b                   | 97.28803           | 54.896             | -0.82524       | 3.68E-08 |
| hsa-mir-133a-1                 | 312.1982           | 194.4605           | -0.68289       | 6.91E-08 |
| hsa-mir-133a-2                 | 280.4872           | 178.0972           | -0.65511       | 2.36E-07 |
| hsa-mir-508                    | 179.5153           | 9.037174           | -0.98947       | 2.10E-06 |
| hsa-mir-6510                   | 26.67336           | 13.66561           | -0.96154       | 2.74E-06 |
| hsa-mir-23c                    | 2.928975           | 1.335848           | -1.12683       | 5.76E-06 |
| hsa-mir-7641-                  | 1.276956           | 0.367302           | -1.75107       | 2.19E-05 |

|                |          |          |          |          |
|----------------|----------|----------|----------|----------|
| 1              |          |          |          |          |
| hsa-mir-6715b  | 8.748858 | 3.686533 | -1.0408  | 6.84E-05 |
| hsa-mir-891a   | 20.74194 | 12.63247 | -0.71985 | 6.84E-05 |
| hsa-mir-7641-2 | 0.88773  | 0.285565 | -1.44272 | 0.000534 |
| hsa-mir-514a-1 | 13.38529 | 1.025652 | -1.09355 | 0.000747 |
| hsa-mir-1258   | 5.779094 | 3.686174 | -0.61435 | 0.001214 |
| hsa-mir-378d-1 | 1.165537 | 0.749523 | -0.67395 | 0.003631 |
| hsa-mir-509-1  | 9.281989 | 0.698164 | -0.92454 | 0.008238 |
| hsa-mir-3622a  | 1.003318 | 0.635903 | -0.6416  | 0.010377 |
| hsa-mir-514a-3 | 13.50021 | 1.226487 | -0.76929 | 0.01278  |
| hsa-mir-514a-2 | 13.68334 | 1.358583 | -0.74592 | 0.013026 |
| hsa-mir-499a   | 3.163858 | 2.701792 | -0.69831 | 0.013241 |
| hsa-mir-509-3  | 11.26123 | 0.764107 | -0.86811 | 0.015366 |
| hsa-mir-509-2  | 9.179771 | 0.737556 | -0.88285 | 0.019274 |

| Supplementary Data4-3:DEmRNAs         |                    |                    |                |          |  |
|---------------------------------------|--------------------|--------------------|----------------|----------|--|
| gene                                  | mean of LRBM group | mean of HRBM group | log2FoldChange | padj     |  |
| NETO1 ENSG00000166342 protein_coding  | 27.15553362        | 304.4266401        | 3.39337        | 6.71E-30 |  |
| UBE2C ENSG00000175063 protein_coding  | 170.1506608        | 510.1268994        | 1.584716       | 6.11E-29 |  |
| TICRR ENSG00000140534 protein_coding  | 68.78937596        | 138.2248842        | 1.004883       | 4.43E-27 |  |
| MYBL2 ENSG00000101057 protein_coding  | 248.2171393        | 667.9170427        | 1.427815       | 2.84E-26 |  |
| CENPA ENSG00000115163 protein_coding  | 47.49012856        | 123.0165576        | 1.372467       | 2.91E-25 |  |
| ORC6 ENSG00000091651 protein_coding   | 78.8260329         | 158.0682171        | 1.004785       | 2.91E-25 |  |
| KIF18B ENSG00000186185 protein_coding | 61.886546          | 157.359111         | 1.344587       | 4.21E-   |  |

|                                       |             |             |          |          |
|---------------------------------------|-------------|-------------|----------|----------|
| ng                                    | 54          | 6           |          | 25       |
| RAD54L ENSG00000085999 protein_coding | 53.54047146 | 117.0030017 | 1.125885 | 1.68E-24 |
| CDC20 ENSG00000117399 protein_coding  | 209.9495882 | 489.7098139 | 1.221758 | 5.55E-24 |
| SHCBP1 ENSG00000171241 protein_coding | 71.23556821 | 158.6929225 | 1.154959 | 7.65E-24 |
| PKMYT1 ENSG00000127564 protein_coding | 153.5820711 | 318.9604388 | 1.054183 | 1.37E-23 |
| PLK1 ENSG00000166851 protein_coding   | 180.9160403 | 376.5091575 | 1.056918 | 2.79E-23 |
| TPX2 ENSG00000088325 protein_coding   | 376.0229466 | 832.8294228 | 1.146879 | 2.79E-23 |
| TROAP ENSG00000135451 protein_coding  | 110.8512914 | 252.7883854 | 1.189564 | 7.19E-23 |
| UTS2B ENSG00000188958 protein_coding  | 28.21694414 | 141.9021165 | 2.095441 | 1.07E-22 |
| POLQ ENSG00000051341 protein_coding   | 49.23379832 | 112.0158303 | 1.182658 | 2.07E-22 |
| NUF2 ENSG00000143228 protein_coding   | 63.45344636 | 135.4787743 | 1.093786 | 2.32E-22 |
| PTPRR ENSG00000153233 protein_coding  | 42.66492278 | 351.2890524 | 2.005415 | 4.94E-22 |
| MCM10 ENSG00000065328 protein_coding  | 44.08995242 | 102.7311374 | 1.216905 | 5.03E-22 |
| CDKN3 ENSG00000100526 protein_coding  | 83.33538227 | 172.2731209 | 1.046928 | 7.23E-22 |
| EXO1 ENSG00000174371 protein_coding   | 56.18046798 | 124.0383575 | 1.13859  | 1.06E-21 |
| SUCNR1 ENSG00000198829 protein_coding | 51.80892836 | 430.8736002 | 2.05773  | 2.73E-21 |
| KIF15 ENSG00000163808 protein_coding  | 102.3524725 | 213.9613303 | 1.062386 | 4.86E-21 |
| MELK ENSG00000165304 protein_coding   | 111.9288611 | 249.2078146 | 1.153372 | 4.86E-21 |
| INSM2 ENSG00000168348 protein_coding  | 2.235753544 | 21.98545493 | 2.783232 | 5.21E-21 |
| CDK1 ENSG00000170312 protein_coding   | 317.2413161 | 684.5634118 | 1.10938  | 6.08E-21 |
| KIF4A ENSG00000090889 protein_coding  | 171.0679592 | 388.1306993 | 1.181324 | 6.08E-21 |
| UHRF1 ENSG00000276043 protein_coding  | 120.3950211 | 256.7186579 | 1.090804 | 1.03E-20 |

|                                        |             |             |          |          |
|----------------------------------------|-------------|-------------|----------|----------|
| ESPL1 ENSG00000135476 protein_coding   | 99.71199492 | 211.851972  | 1.085404 | 1.45E-20 |
| NEK2 ENSG00000117650 protein_coding    | 84.39167807 | 198.6083704 | 1.233607 | 1.47E-20 |
| BIRC5 ENSG00000089685 protein_coding   | 291.1705751 | 640.8928543 | 1.138329 | 3.10E-20 |
| ASF1B ENSG00000105011 protein_coding   | 200.4636169 | 408.0338171 | 1.02457  | 3.40E-20 |
| FAM72B ENSG00000188610 protein_coding  | 9.585061807 | 20.4172371  | 1.075957 | 3.40E-20 |
| SGO1 ENSG00000129810 protein_coding    | 36.13915244 | 80.21942772 | 1.148073 | 6.03E-20 |
| DLGAP5 ENSG00000126787 protein_coding  | 98.10358003 | 216.9948557 | 1.144025 | 1.19E-19 |
| EFNA3 ENSG00000143590 protein_coding   | 167.5430742 | 348.9844078 | 1.059713 | 1.74E-19 |
| BUB1 ENSG00000169679 protein_coding    | 161.4451886 | 341.6848051 | 1.080451 | 1.86E-19 |
| COL11A1 ENSG00000060718 protein_coding | 100.6922355 | 133.2059591 | 1.891483 | 2.39E-19 |
| IQGAP3 ENSG00000183856 protein_coding  | 165.9229413 | 351.9630384 | 1.084429 | 2.72E-19 |
| CBX2 ENSG00000173894 protein_coding    | 212.0243516 | 462.4560852 | 1.125108 | 2.81E-19 |
| RRM2 ENSG00000171848 protein_coding    | 354.756884  | 776.2249808 | 1.129205 | 3.05E-19 |
| SYT4 ENSG00000132872 protein_coding    | 116.4260089 | 517.5414346 | 2.44689  | 4.95E-19 |
| NUSAP1 ENSG00000137804 protein_coding  | 325.3788802 | 660.874498  | 1.02168  | 6.29E-19 |
| MTRF2 ENSG00000146410 protein_coding   | 21.37343419 | 43.09334906 | 1.00562  | 1.37E-18 |
| NCAPG ENSG00000109805 protein_coding   | 112.6870927 | 237.0773391 | 1.071995 | 3.04E-18 |
| KIF20A ENSG00000112984 protein_coding  | 165.4435001 | 359.3774421 | 1.118746 | 3.72E-18 |
| CKAP2L ENSG00000169607 protein_coding  | 62.59353613 | 136.3941355 | 1.121124 | 4.29E-18 |
| PNMA5 ENSG00000198883 protein_coding   | 2.376691582 | 53.95010454 | 2.38516  | 5.21E-18 |
| LIPF ENSG00000182333 protein_coding    | 2.934990394 | 1565.715082 | 5.037251 | 8.23E-18 |
| HOXB5 ENSG00000120075 protein_coding   | 17.50194917 | 31.02549784 | 1.603758 | 1.06E-17 |

|                                         |             |             |          |          |
|-----------------------------------------|-------------|-------------|----------|----------|
| ANLN ENSG00000011426 protein_coding     | 193.2785863 | 408.949242  | 1.080329 | 1.18E-17 |
| NCAPH ENSG00000121152 protein_coding    | 111.0796271 | 224.811448  | 1.01588  | 2.10E-17 |
| CENPF ENSG00000117724 protein_coding    | 428.6132485 | 890.0473507 | 1.05383  | 2.35E-17 |
| HOXD1 ENSG00000128645 protein_coding    | 19.90912907 | 69.38620597 | 1.980592 | 2.58E-17 |
| CEP55 ENSG00000138180 protein_coding    | 105.8285185 | 223.1587978 | 1.073763 | 3.35E-17 |
| TOP2A ENSG00000131747 protein_coding    | 699.8175403 | 1526.760724 | 1.125223 | 3.93E-17 |
| NEIL3 ENSG00000109674 protein_coding    | 19.33802505 | 43.55579859 | 1.165385 | 9.26E-17 |
| SERPINI1 ENSG00000163536 protein_coding | 489.2070087 | 1167.849835 | 1.25535  | 9.84E-17 |
| NCAM2 ENSG00000154654 protein_coding    | 269.6563626 | 668.2987104 | 1.514659 | 1.21E-16 |
| GTSE1 ENSG00000075218 protein_coding    | 109.5203877 | 221.5761032 | 1.016109 | 1.53E-16 |
| CDC25C ENSG00000158402 protein_coding   | 49.49097027 | 99.24381684 | 1.00406  | 2.07E-16 |
| KLK14 ENSG00000129437 protein_coding    | 160.3737285 | 462.4439725 | 1.781653 | 2.30E-16 |
| FAM72D ENSG00000215784 protein_coding   | 4.519289203 | 10.21458859 | 1.192124 | 3.30E-16 |
| KIF14 ENSG00000118193 protein_coding    | 47.41849769 | 99.57402252 | 1.067599 | 1.06E-15 |
| THBS2 ENSG00000186340 protein_coding    | 1709.775493 | 2888.208559 | 1.025935 | 2.96E-15 |
| TUBB3 ENSG00000258947 protein_coding    | 35.84164571 | 82.21696207 | 1.19578  | 3.57E-15 |
| EFNA2 ENSG00000099617 protein_coding    | 7.280486342 | 23.41073109 | 1.690546 | 4.18E-15 |
| KRT75 ENSG00000170454 protein_coding    | 15.53551938 | 47.0820355  | 2.126786 | 4.58E-15 |
| ASPM ENSG00000066279 protein_coding     | 126.7887162 | 264.406398  | 1.058856 | 6.22E-15 |
| HJURP ENSG00000123485 protein_coding    | 178.1488793 | 367.1515987 | 1.043037 | 6.24E-15 |
| PBK ENSG00000168078 protein_coding      | 80.28501012 | 169.0648404 | 1.073109 | 6.74E-15 |
| SGK2 ENSG00000101049 protein_coding     | 48.92088677 | 125.1915838 | 1.355807 | 9.77E-15 |

|                                        |             |             |          |          |
|----------------------------------------|-------------|-------------|----------|----------|
| DEPDC1B ENSG00000035499 protein_coding | 74.36828132 | 153.0511106 | 1.040034 | 6.44E-14 |
| SSTR1 ENSG00000139874 protein_coding   | 762.2074702 | 2026.157839 | 1.410517 | 1.22E-13 |
| CTHRC1 ENSG00000164932 protein_coding  | 278.6066037 | 442.723946  | 1.010921 | 1.97E-13 |
| RDM1 ENSG00000278023 protein_coding    | 10.22573368 | 21.29616862 | 1.061828 | 2.51E-13 |
| PLEKHD1 ENSG00000175985 protein_coding | 19.78704153 | 41.1822533  | 1.061277 | 4.16E-13 |
| AKR1C3 ENSG00000196139 protein_coding  | 240.4155667 | 518.3709178 | 1.108767 | 6.93E-13 |
| BMP6 ENSG00000153162 protein_coding    | 370.8620688 | 783.3268508 | 1.078948 | 8.51E-13 |
| CAMKV ENSG00000164076 protein_coding   | 4.745831218 | 30.2571365  | 1.886628 | 1.23E-12 |
| E2F8 ENSG00000129173 protein_coding    | 33.67394131 | 68.61767363 | 1.023113 | 1.43E-12 |
| DNAH8 ENSG00000124721 protein_coding   | 1475.247515 | 3433.710147 | 1.523547 | 3.57E-12 |
| UGT2B15 ENSG00000196620 protein_coding | 52.45212123 | 131.2621319 | 1.803824 | 4.53E-12 |
| SCRT1 ENSG00000261678 protein_coding   | 3.841716967 | 23.98900963 | 1.197497 | 9.35E-12 |
| MYT1 ENSG00000196132 protein_coding    | 49.35823376 | 158.0544178 | 1.678535 | 1.16E-11 |
| MUC1 ENSG00000185499 protein_coding    | 1242.155985 | 2937.868383 | 1.241927 | 1.26E-11 |
| PTK6 ENSG00000101213 protein_coding    | 614.8531393 | 1295.920662 | 1.075653 | 3.00E-11 |
| EOMES ENSG00000163508 protein_coding   | 43.19780976 | 96.39115045 | 1.155663 | 3.11E-11 |
| COL10A1 ENSG00000123500 protein_coding | 453.9047021 | 759.116208  | 1.320095 | 3.81E-11 |
| IFI44L ENSG00000137959 protein_coding  | 460.4996621 | 938.7982605 | 1.027903 | 4.64E-11 |
| CELSR3 ENSG00000008300 protein_coding  | 300.916533  | 618.2586197 | 1.039042 | 9.57E-11 |
| S100P ENSG00000163993 protein_coding   | 726.9955498 | 1618.352579 | 1.520938 | 9.61E-11 |
| OMP ENSG00000254550 protein_coding     | 4.67261063  | 11.15725314 | 1.248435 | 1.01E-10 |
| HTR2A ENSG00000102468 protein_coding   | 11.72012019 | 25.88493452 | 1.143982 | 1.64E-10 |



|                                        |             |             |          |          |
|----------------------------------------|-------------|-------------|----------|----------|
| HOXB6 ENSG00000108511 protein_coding   | 34.40838945 | 56.6334882  | 1.018765 | 1.92E-10 |
| CST2 ENSG00000170369 protein_coding    | 718.3465453 | 1632.081965 | 1.470239 | 2.14E-10 |
| PDIA2 ENSG00000185615 protein_coding   | 96.35176931 | 288.2029444 | 1.581974 | 2.36E-10 |
| FNDC1 ENSG00000164694 protein_coding   | 107.7344583 | 153.5520622 | 1.118859 | 3.06E-10 |
| MAGEA8 ENSG00000156009 protein_coding  | 7.842683696 | 30.97650529 | 1.668845 | 3.06E-10 |
| FGB ENSG00000171564 protein_coding     | 15.86237548 | 134.3820205 | 3.15592  | 3.18E-10 |
| LHX2 ENSG00000106689 protein_coding    | 5.669855772 | 13.5385162  | 1.267422 | 3.99E-10 |
| ZBBX ENSG00000169064 protein_coding    | 12.98785696 | 36.21470582 | 1.798234 | 4.89E-10 |
| FAM72C ENSG00000263513 protein_coding  | 2.817033615 | 5.910498521 | 1.094672 | 4.95E-10 |
| LRTM2 ENSG00000166159 protein_coding   | 4.3720224   | 15.33975593 | 1.421352 | 1.31E-09 |
| MAB21L2 ENSG00000181541 protein_coding | 8.46093593  | 18.25121112 | 1.12601  | 1.36E-09 |
| ZPLD1 ENSG00000170044 protein_coding   | 1.322770979 | 3.530349158 | 1.449131 | 2.41E-09 |
| TTC29 ENSG00000137473 protein_coding   | 14.79242137 | 34.1944224  | 1.520848 | 2.51E-09 |
| CDC20B ENSG00000164287 protein_coding  | 50.77245127 | 483.6451572 | 1.729127 | 3.77E-09 |
| A1CF ENSG00000148584 protein_coding    | 18.86801044 | 48.70315339 | 1.639357 | 6.59E-09 |
| ODF3L2 ENSG00000181781 protein_coding  | 15.52562915 | 32.42101452 | 1.064747 | 6.92E-09 |
| DHRS2 ENSG00000100867 protein_coding   | 104.3925647 | 547.6246756 | 1.311062 | 6.96E-09 |
| C6orf10 ENSG00000204296 protein_coding | 4.129058247 | 32.47222065 | 1.751499 | 7.25E-09 |
| HTR1F ENSG00000179097 protein_coding   | 5.979435654 | 12.44271495 | 1.04891  | 8.03E-09 |
| BARX1 ENSG00000131668 protein_coding   | 10.45066846 | 26.57431845 | 1.350808 | 8.48E-09 |
| DIRAS2 ENSG00000165023 protein_coding  | 65.56205534 | 173.7028985 | 1.405485 | 9.70E-09 |
| RAB3C ENSG00000152932 protein_coding   | 18.95989505 | 38.88793522 | 1.036568 | 2.31E-08 |

|                                         |             |             |          |          |
|-----------------------------------------|-------------|-------------|----------|----------|
| SI ENSG00000090402 protein_coding       | 354.2966557 | 929.5965287 | 1.391539 | 2.43E-08 |
| DQX1 ENSG00000144045 protein_coding     | 10.3007988  | 27.07765783 | 1.105081 | 3.05E-08 |
| PCDHGA5 ENSG00000253485 protein_coding  | 326.6614556 | 673.3254174 | 1.043436 | 3.19E-08 |
| ARHGDIG ENSG00000242173 protein_coding  | 138.9181691 | 293.3847196 | 1.08093  | 3.58E-08 |
| DMBX1 ENSG00000197587 protein_coding    | 3.344948563 | 7.445152673 | 1.149339 | 5.17E-08 |
| GRIK1 ENSG00000171189 protein_coding    | 152.4237445 | 353.3016055 | 1.212819 | 6.01E-08 |
| ACY3 ENSG00000132744 protein_coding     | 57.40363795 | 440.3301713 | 1.286269 | 7.90E-08 |
| TUNAR ENSG00000250366 protein_coding    | 38.46562351 | 111.0731132 | 1.770529 | 9.00E-08 |
| CA1 ENSG00000133742 protein_coding      | 4.582838903 | 10.22448419 | 1.749662 | 9.89E-08 |
| CCDC194 ENSG00000269720 protein_coding  | 0.995184105 | 5.986367478 | 1.528257 | 1.10E-07 |
| TEX19 ENSG00000182459 protein_coding    | 1.019521599 | 2.42676782  | 1.202358 | 1.67E-07 |
| SLC9A3 ENSG00000066230 protein_coding   | 100.4358579 | 209.2067083 | 1.057969 | 2.33E-07 |
| FAM135B ENSG00000147724 protein_coding  | 40.50337111 | 99.16844219 | 1.292561 | 2.43E-07 |
| AKR1D1 ENSG00000122787 protein_coding   | 4.630258566 | 9.60348768  | 1.349796 | 3.05E-07 |
| HIST1H3B ENSG00000274267 protein_coding | 2.756117059 | 6.696680512 | 1.28093  | 3.18E-07 |
| IL36RN ENSG00000136695 protein_coding   | 10.60717067 | 27.66429071 | 1.387746 | 3.18E-07 |
| WFDC5 ENSG00000175121 protein_coding    | 50.25068263 | 212.3805826 | 1.45405  | 3.94E-07 |
| HIST1H3C ENSG00000278272 protein_coding | 3.417190215 | 7.502142568 | 1.137322 | 4.04E-07 |
| CST5 ENSG00000170367 protein_coding     | 6.371963379 | 11.92059986 | 1.16521  | 4.46E-07 |
| BRS3 ENSG00000102239 protein_coding     | 0.492803493 | 1.522274437 | 1.717721 | 4.70E-07 |
| MATN4 ENSG00000124159 protein_coding    | 9.198508289 | 24.55234146 | 1.080706 | 6.49E-07 |
| FOXG1 ENSG00000176165 protein_coding    | 7.007541225 | 13.08637713 | 2.379006 | 6.85E-07 |

|                                           |             |             |          |          |
|-------------------------------------------|-------------|-------------|----------|----------|
| MAGEA1 ENSG00000198681 protein_coding     | 1.816198245 | 35.99456507 | 3.461184 | 7.47E-07 |
| OPRK1 ENSG00000082556 protein_coding      | 419.1943196 | 842.9052192 | 1.007591 | 7.47E-07 |
| ASZ1 ENSG00000154438 protein_coding       | 2.353525008 | 19.54261083 | 1.621493 | 1.10E-06 |
| NKX6-1 ENSG00000163623 protein_coding     | 32.90444412 | 89.17425124 | 1.43761  | 1.38E-06 |
| ANO3 ENSG00000134343 protein_coding       | 32.82203637 | 36.35669198 | 1.100239 | 1.82E-06 |
| VWA5B1 ENSG00000158816 protein_coding     | 62.17154805 | 221.1171698 | 1.531688 | 1.82E-06 |
| C5orf46 ENSG00000178776 protein_coding    | 16.27791753 | 35.58417531 | 1.13049  | 1.83E-06 |
| CCDC144NL ENSG00000205212 protein_coding  | 14.94152924 | 43.47109418 | 1.228983 | 2.48E-06 |
| RFX6 ENSG00000185002 protein_coding       | 82.945683   | 186.4445286 | 1.168548 | 2.87E-06 |
| TYRP1 ENSG00000107165 protein_coding      | 40.48628205 | 86.30692453 | 1.09255  | 4.82E-06 |
| DGKK ENSG00000274588 protein_coding       | 7.058782018 | 28.95307244 | 1.081806 | 5.78E-06 |
| ZNF556 ENSG00000172000 protein_coding     | 34.40526279 | 86.06196258 | 1.321238 | 5.97E-06 |
| KCNQ2 ENSG00000075043 protein_coding      | 125.8608435 | 343.4536683 | 1.200541 | 6.52E-06 |
| AVPR1B ENSG00000198049 protein_coding     | 3.086727596 | 11.08243159 | 1.101606 | 7.95E-06 |
| OTOR ENSG00000125879 protein_coding       | 2.064396372 | 10.38930071 | 1.876689 | 1.72E-05 |
| HAND1 ENSG00000113196 protein_coding      | 0.945855137 | 3.215906139 | 1.771626 | 1.79E-05 |
| AP002373.1 ENSG00000255663 protein_coding | 0.583488364 | 1.445583568 | 1.331538 | 1.89E-05 |
| TRPC5OS ENSG00000204025 protein_coding    | 0.404611826 | 0.915342492 | 1.143546 | 1.92E-05 |
| MUC6 ENSG00000184956 protein_coding       | 901.9215107 | 1881.274976 | 1.583262 | 1.93E-05 |
| TUBA4B ENSG00000243910 protein_coding     | 23.1771235  | 23.9616762  | 1.234232 | 2.01E-05 |
| CLRN3 ENSG00000180745 protein_coding      | 1.653029137 | 7.692290912 | 1.228037 | 2.04E-05 |
| ADAM18 ENSG00000168619 protein_coding     | 1.604581943 | 3.588764605 | 1.555583 | 2.15E-05 |

|                                           |             |             |          |          |
|-------------------------------------------|-------------|-------------|----------|----------|
| CALML5 ENSG00000178372 protein_coding     | 3.94936597  | 143.3264271 | 1.176178 | 2.30E-05 |
| TM4SF20 ENSG00000168955 protein_coding    | 1.714362768 | 15.70553242 | 1.327753 | 2.38E-05 |
| SOX11 ENSG00000176887 protein_coding      | 7.82146957  | 13.51815258 | 1.141241 | 2.69E-05 |
| STMN2 ENSG00000104435 protein_coding      | 85.41023695 | 170.7980044 | 1.000067 | 3.10E-05 |
| CTAG2 ENSG00000126890 protein_coding      | 28.3641054  | 33.02625191 | 2.972305 | 3.12E-05 |
| ATP12A ENSG00000075673 protein_coding     | 127.2561816 | 804.0908348 | 1.223573 | 3.19E-05 |
| SLC17A4 ENSG00000146039 protein_coding    | 29.70293551 | 71.76673499 | 1.611312 | 3.25E-05 |
| KCNK4 ENSG00000182450 protein_coding      | 0.445615278 | 1.054929458 | 1.219146 | 3.36E-05 |
| KHDC1L ENSG00000256980 protein_coding     | 7.709907134 | 26.49770586 | 1.135921 | 3.36E-05 |
| PAEP ENSG00000122133 protein_coding       | 2.152418403 | 5.717115147 | 1.52631  | 3.63E-05 |
| ASIC2 ENSG00000108684 protein_coding      | 55.77603816 | 123.5523609 | 1.147163 | 4.37E-05 |
| CER1 ENSG00000147869 protein_coding       | 0.887034189 | 1.672919602 | 1.356887 | 4.38E-05 |
| FCRL2 ENSG00000132704 protein_coding      | 18.83686457 | 25.44743377 | 1.014591 | 4.63E-05 |
| HIST1H2AJ ENSG00000276368 protein_coding  | 0.967572939 | 1.991942237 | 1.085918 | 4.87E-05 |
| PPFIA2 ENSG00000139220 protein_coding     | 481.0711157 | 1029.000932 | 1.096883 | 6.28E-05 |
| IBSP ENSG00000029559 protein_coding       | 3.675471268 | 6.812618331 | 1.553161 | 7.65E-05 |
| HIST1H4A ENSG00000278637 protein_coding   | 0.47745762  | 1.213962048 | 1.348654 | 7.82E-05 |
| AL928654.3 ENSG00000257341 protein_coding | 0.701651778 | 1.480322279 | 1.0708   | 8.20E-05 |
| DDX53 ENSG00000184735 protein_coding      | 0.806755876 | 3.467968173 | 2.291538 | 8.62E-05 |
| OTOP3 ENSG00000182938 protein_coding      | 3.599132312 | 12.44214553 | 1.345604 | 0.000101 |
| UGT1A1 ENSG00000241635 protein_coding     | 12.98410829 | 46.91576673 | 1.522706 | 0.000116 |
| UGT2B17 ENSG00000197888 protein_coding    | 9.092144507 | 17.36089317 | 1.154037 | 0.000134 |

|                                         |             |             |          |          |
|-----------------------------------------|-------------|-------------|----------|----------|
| ABCC11 ENSG00000121270 protein_coding   | 612.7897259 | 972.4698512 | 1.022437 | 0.000141 |
| SCRT2 ENSG00000215397 protein_coding    | 0.290477693 | 9.025470505 | 2.121507 | 0.000214 |
| ANKRD30B ENSG00000180777 protein_coding | 13.53889086 | 18.9886804  | 1.017868 | 0.00023  |
| TLX1 ENSG00000107807 protein_coding     | 2.257885925 | 5.981935213 | 1.066541 | 0.000263 |
| TLX2 ENSG00000115297 protein_coding     | 1.308411064 | 2.610243724 | 1.033827 | 0.000296 |
| OR51D1 ENSG00000197428 protein_coding   | 2.920398252 | 6.405892059 | 1.14756  | 0.000297 |
| PSCA ENSG00000167653 protein_coding     | 7733.1153   | 16119.15048 | 1.059666 | 0.000419 |
| HIST1H3I ENSG00000275379 protein_coding | 0.601360207 | 3.259474327 | 1.51786  | 0.000429 |
| LRRTM3 ENSG00000198739 protein_coding   | 6.651276311 | 33.6916746  | 1.055989 | 0.000439 |
| CARD18 ENSG00000255501 protein_coding   | 0.315887122 | 10.89041387 | 3.138526 | 0.000507 |
| TGM6 ENSG00000166948 protein_coding     | 1.758196089 | 2.532490419 | 1.056457 | 0.000531 |
| ADGB ENSG00000118492 protein_coding     | 6.773775065 | 8.099581556 | 1.023455 | 0.000572 |
| HIST1H3F ENSG00000277775 protein_coding | 1.289411693 | 2.645032917 | 1.024478 | 0.000573 |
| PLAC1 ENSG00000170965 protein_coding    | 1.66324769  | 3.389720705 | 1.050852 | 0.000681 |
| RP1 ENSG00000104237 protein_coding      | 2.158738222 | 3.795483563 | 1.119381 | 0.000698 |
| C9orf135 ENSG00000204711 protein_coding | 2.955773224 | 6.195641557 | 1.084103 | 0.000894 |
| ANKRD34B ENSG00000189127 protein_coding | 377.2573853 | 823.9382616 | 1.12696  | 0.000925 |
| CCDC166 ENSG00000255181 protein_coding  | 0.512391747 | 1.107018955 | 1.091715 | 0.001093 |
| CHAT ENSG00000070748 protein_coding     | 3.000920514 | 32.7100541  | 1.395798 | 0.00134  |
| OR1Q1 ENSG00000165202 protein_coding    | 0.409479518 | 1.034700275 | 1.157107 | 0.002175 |
| OR1J1 ENSG00000136834 protein_coding    | 0.381791068 | 0.901484714 | 1.140166 | 0.002326 |
| LHX9 ENSG00000143355 protein_coding     | 9.042210941 | 24.33526657 | 1.027462 | 0.002502 |

|                                         |             |             |          |          |
|-----------------------------------------|-------------|-------------|----------|----------|
| CRISP3 ENSG00000096006 protein_coding   | 7842.244656 | 16311.42259 | 1.056543 | 0.002611 |
| ANKRD30A ENSG00000148513 protein_coding | 41.92723925 | 93.63940313 | 1.337625 | 0.002686 |
| SERPINA4 ENSG00000100665 protein_coding | 85.05830033 | 89.81011418 | 1.115328 | 0.002888 |
| GPR149 ENSG00000174948 protein_coding   | 3.768578485 | 7.955490455 | 1.730461 | 0.003191 |
| CLPSL1 ENSG00000204140 protein_coding   | 1.301025278 | 2.612442586 | 1.40674  | 0.003257 |
| IAPP ENSG00000121351 protein_coding     | 27.4523073  | 31.01489851 | 1.233546 | 0.003311 |
| LHFPL5 ENSG00000197753 protein_coding   | 0.629802595 | 1.383703782 | 1.121535 | 0.003388 |
| B3GNT6 ENSG00000198488 protein_coding   | 531.2110062 | 1085.183366 | 1.030501 | 0.003998 |
| C16orf92 ENSG00000167194 protein_coding | 0.238663266 | 0.700118247 | 1.272965 | 0.004234 |
| MAGEA12 ENSG00000213401 protein_coding  | 5.34147082  | 11.95462276 | 1.229727 | 0.00505  |
| KLHL1 ENSG00000150361 protein_coding    | 10.79917182 | 32.5829923  | 1.035677 | 0.00518  |
| SLC13A1 ENSG00000081800 protein_coding  | 0.605887349 | 1.310081564 | 1.088826 | 0.00557  |
| FDCSP ENSG00000181617 protein_coding    | 16.08770245 | 25.42384894 | 1.167052 | 0.00557  |
| CSAG2 ENSG00000268902 protein_coding    | 1.102275719 | 1.647537999 | 1.000313 | 0.006411 |
| SIM1 ENSG00000112246 protein_coding     | 1.561402609 | 6.517429629 | 1.119748 | 0.006499 |
| DYTN ENSG00000232125 protein_coding     | 27.35588225 | 57.76317913 | 1.079343 | 0.008531 |
| PLA2G2E ENSG00000188784 protein_coding  | 0.834453457 | 1.945395978 | 1.236242 | 0.009904 |
| SLC17A1 ENSG00000124568 protein_coding  | 1.244916647 | 2.549702622 | 1.097167 | 0.011641 |
| CT45A10 ENSG00000269586 protein_coding  | 0.119802569 | 10.22385892 | 3.067674 | 0.012609 |
| REG1A ENSG00000115386 protein_coding    | 10.61963215 | 21.40554538 | 1.197719 | 0.013831 |
| MAGEA6 ENSG00000197172 protein_coding   | 8.093728173 | 18.32006368 | 2.034949 | 0.014617 |
| UGT2A3 ENSG00000135220 protein_coding   | 0.780726231 | 6.611336347 | 1.524122 | 0.018595 |

|                                         |             |             |          |          |
|-----------------------------------------|-------------|-------------|----------|----------|
| APOH ENSG00000091583 protein_coding     | 22.30775308 | 57.82441037 | 1.329214 | 0.020076 |
| DCAF4L2 ENSG00000176566 protein_coding  | 2.389995928 | 7.027840399 | 2.345518 | 0.020658 |
| CPN1 ENSG00000120054 protein_coding     | 2.013116707 | 4.278660022 | 1.179894 | 0.023129 |
| FGA ENSG00000171560 protein_coding      | 19.33134206 | 35.36733038 | 1.787218 | 0.026852 |
| SPRR2F ENSG00000244094 protein_coding   | 0.941306052 | 2.165465937 | 1.210606 | 0.027787 |
| ASIC5 ENSG00000256394 protein_coding    | 4.595709637 | 7.312950034 | 1.222933 | 0.032246 |
| C3orf30 ENSG00000163424 protein_coding  | 0.928427758 | 3.232051142 | 1.383048 | 0.032316 |
| IFNL3 ENSG00000197110 protein_coding    | 0.219013501 | 0.654344007 | 1.282685 | 0.032919 |
| AKR1C4 ENSG00000198610 protein_coding   | 1.230094615 | 1.976567025 | 1.041173 | 0.033473 |
| HRG ENSG00000113905 protein_coding      | 3.245466087 | 3.755477239 | 1.077301 | 0.036557 |
| APOA2 ENSG00000158874 protein_coding    | 17.70761012 | 44.97787907 | 1.497373 | 0.037169 |
| ZNF280A ENSG00000169548 protein_coding  | 0.22866832  | 0.592914862 | 1.101173 | 0.039035 |
| TRIM49B ENSG00000182053 protein_coding  | 0.377307279 | 1.994111303 | 1.223879 | 0.040085 |
| SLC18A3 ENSG00000187714 protein_coding  | 13.54654393 | 48.17690044 | 1.005844 | 0.044434 |
| PAH ENSG00000171759 protein_coding      | 212.2538632 | 43.74090043 | -2.8991  | 2.48E-23 |
| PROK1 ENSG00000143125 protein_coding    | 231.8181409 | 80.30976022 | -1.52928 | 1.27E-15 |
| FMOD ENSG00000122176 protein_coding     | 15898.7405  | 7917.205683 | -1.00586 | 2.31E-13 |
| CHI3L2 ENSG00000064886 protein_coding   | 573.8972866 | 178.2515231 | -1.6869  | 3.42E-13 |
| CHRNA2 ENSG00000120903 protein_coding   | 9460.848073 | 4599.241112 | -1.04059 | 8.16E-12 |
| CDC42EP5 ENSG00000167617 protein_coding | 2176.388791 | 1011.224608 | -1.10581 | 1.81E-11 |
| CA14 ENSG00000118298 protein_coding     | 116.7423807 | 58.15671704 | -1.00531 | 1.81E-11 |
| CPNE6 ENSG00000100884 protein_coding    | 166.359627  | 61.36188108 | -1.43822 | 2.08E-11 |

|                                              |             |             |          |          |
|----------------------------------------------|-------------|-------------|----------|----------|
| RPE65 ENSG00000116745 protein_coding         | 47.31579773 | 15.89098367 | -1.57447 | 2.82E-11 |
| SCGB3A1 ENSG00000161055 protein_coding       | 240.0993377 | 152.9084395 | -1.42024 | 1.48E-10 |
| CD38 ENSG00000004468 protein_coding          | 3618.286695 | 1422.528531 | -1.34684 | 3.98E-10 |
| SAA2 ENSG00000134339 protein_coding          | 261.2713305 | 105.0963787 | -1.65738 | 4.60E-10 |
| IGSF1 ENSG00000147255 protein_coding         | 122.0917554 | 53.65197093 | -1.18516 | 5.10E-10 |
| PHYHD1 ENSG00000175287 protein_coding        | 2029.505762 | 994.4860385 | -1.02905 | 1.29E-09 |
| SLC5A8 ENSG00000256870 protein_coding        | 118.8836569 | 43.2515031  | -1.45718 | 1.33E-09 |
| AL049839.2 ENSG00000273259 protein_coding    | 45.23110469 | 24.40884042 | -1.26046 | 1.44E-09 |
| TG ENSG00000042832 protein_coding            | 1729.514954 | 305.2280415 | -1.30603 | 1.60E-09 |
| RAMACL ENSG00000235272 protein_coding        | 8.384769968 | 4.098970946 | -1.62767 | 1.77E-09 |
| LY6G6F-LY6G6D ENSG00000250641 protein_coding | 12.2102142  | 10.42559572 | -1.28534 | 3.12E-09 |
| SLC18A2 ENSG00000165646 protein_coding       | 139.0643671 | 63.91862005 | -1.1207  | 4.95E-09 |
| GFAP ENSG00000131095 protein_coding          | 84.97054922 | 58.36063347 | -1.35268 | 4.97E-09 |
| LY6G6D ENSG00000244355 protein_coding        | 11.99064355 | 9.74760828  | -1.25434 | 1.37E-08 |
| INSYN2B ENSG00000204767 protein_coding       | 10.91492027 | 4.375502118 | -1.3142  | 2.23E-08 |
| NPR3 ENSG00000113389 protein_coding          | 3971.871291 | 1747.324996 | -1.18468 | 3.15E-08 |
| IP6K3 ENSG00000161896 protein_coding         | 140.9029883 | 67.16882186 | -1.06755 | 3.44E-08 |
| ORM1 ENSG00000229314 protein_coding          | 6886.633853 | 4465.874095 | -2.23701 | 3.94E-08 |
| LCN2 ENSG00000148346 protein_coding          | 3600.681074 | 1457.620794 | -1.30469 | 4.04E-08 |
| FAM3D ENSG00000198643 protein_coding         | 2277.328522 | 1114.023621 | -1.03152 | 6.76E-08 |
| PEBP4 ENSG00000134020 protein_coding         | 2007.733812 | 943.232648  | -1.08995 | 6.85E-08 |
| SLC7A14 ENSG00000013293 protein_coding       | 12.52553364 | 9.019873192 | -1.06413 | 1.14E-07 |



|                                         |             |             |          |          |
|-----------------------------------------|-------------|-------------|----------|----------|
| MAB21L1 ENSG00000180660 protein_coding  | 136.952063  | 52.79801229 | -1.2371  | 1.63E-07 |
| ANPEP ENSG00000166825 protein_coding    | 27862.6639  | 11227.60992 | -1.31128 | 1.75E-07 |
| CLCA2 ENSG00000137975 protein_coding    | 137.9429572 | 67.82325713 | -1.34971 | 1.80E-07 |
| GABRQ ENSG00000268089 protein_coding    | 79.55508425 | 38.5857124  | -1.0427  | 1.92E-07 |
| TMEM213 ENSG00000214128 protein_coding  | 19.42977689 | 10.48475978 | -1.33068 | 2.09E-07 |
| CXCL5 ENSG00000163735 protein_coding    | 140.5227733 | 63.85481741 | -1.38199 | 2.10E-07 |
| EDN3 ENSG00000124205 protein_coding     | 109.7523056 | 87.6828868  | -1.06484 | 2.31E-07 |
| KCTD8 ENSG00000183783 protein_coding    | 45.00198108 | 21.68149094 | -1.05665 | 2.59E-07 |
| LRTM1 ENSG00000144771 protein_coding    | 16.8743918  | 3.486405057 | -2.47322 | 2.98E-07 |
| CKM ENSG00000104879 protein_coding      | 2136.636615 | 685.5543647 | -1.34474 | 5.00E-07 |
| CST4 ENSG00000101441 protein_coding     | 49.08227609 | 85.37104137 | -1.26948 | 5.14E-07 |
| SLC7A4 ENSG00000099960 protein_coding   | 408.7607077 | 186.0424316 | -1.13547 | 7.91E-07 |
| MGAM2 ENSG00000257743 protein_coding    | 15.58605713 | 7.014883467 | -1.14885 | 9.88E-07 |
| ITLN2 ENSG00000158764 protein_coding    | 72.22674445 | 38.59050026 | -1.00773 | 1.88E-06 |
| CRYBA4 ENSG00000196431 protein_coding   | 23.64276729 | 13.3361026  | -1.78776 | 2.91E-06 |
| ARSF ENSG00000062096 protein_coding     | 4.823620567 | 2.151419695 | -1.15849 | 3.39E-06 |
| GPX5 ENSG00000224586 protein_coding     | 21.56406375 | 10.6507571  | -1.39353 | 5.21E-06 |
| SLC1A6 ENSG00000105143 protein_coding   | 6.436020861 | 3.208578549 | -1.00652 | 6.18E-06 |
| GRP ENSG00000134443 protein_coding      | 126.0880585 | 29.35698312 | -1.02678 | 7.24E-06 |
| PON1 ENSG00000005421 protein_coding     | 230.2983854 | 148.0976369 | -1.49985 | 8.72E-06 |
| SERPINA3 ENSG00000196136 protein_coding | 326.1700055 | 158.7072784 | -1.03916 | 9.36E-06 |
| VGLL3 ENSG00000206538 protein_coding    | 6276.393297 | 2723.913516 | -1.20424 | 9.43E-06 |

|                                          |             |             |          |          |
|------------------------------------------|-------------|-------------|----------|----------|
| PCARE ENSG00000179270 protein_coding     | 7.951417216 | 3.72998934  | -1.0711  | 1.01E-05 |
| ZNF648 ENSG00000179930 protein_coding    | 2.175493853 | 0.875036071 | -1.32054 | 1.15E-05 |
| CLEC4M ENSG00000104938 protein_coding    | 2.642978871 | 1.06467621  | -1.26992 | 1.27E-05 |
| CDH18 ENSG00000145526 protein_coding     | 9.731659525 | 4.63772106  | -1.0633  | 1.61E-05 |
| CCDC169 ENSG00000242715 protein_coding   | 311.8613863 | 154.0441397 | -1.01724 | 1.67E-05 |
| ACTA1 ENSG00000143632 protein_coding     | 5365.125219 | 1394.117146 | -1.35455 | 2.11E-05 |
| NRAP ENSG00000197893 protein_coding      | 1631.027923 | 511.1379276 | -1.6091  | 2.15E-05 |
| OLFM4 ENSG00000102837 protein_coding     | 8881.471054 | 3773.516552 | -1.2349  | 2.32E-05 |
| KRT9 ENSG00000171403 protein_coding      | 3.758238807 | 1.717007351 | -1.11802 | 2.54E-05 |
| RLN1 ENSG00000107018 protein_coding      | 5364.891497 | 2010.533849 | -1.41598 | 3.77E-05 |
| CYP4F2 ENSG00000186115 protein_coding    | 309.3446644 | 488.0610562 | -1.31562 | 4.38E-05 |
| SAA2-SAA4 ENSG00000255071 protein_coding | 28.65822492 | 11.06668552 | -1.3894  | 4.48E-05 |
| CARTPT ENSG00000164326 protein_coding    | 150.713089  | 55.12515412 | -1.06908 | 4.93E-05 |
| SLC39A2 ENSG00000165794 protein_coding   | 93.6852979  | 73.72114726 | -1.1586  | 7.32E-05 |
| TECTB ENSG00000119913 protein_coding     | 14.11410998 | 18.6855278  | -1.10169 | 7.89E-05 |
| SAA1 ENSG00000173432 protein_coding      | 727.3825565 | 321.5009027 | -1.05816 | 9.15E-05 |
| KCNG4 ENSG00000168418 protein_coding     | 1.107736888 | 0.430225977 | -1.21604 | 9.15E-05 |
| ATP6V0A4 ENSG00000105929 protein_coding  | 38.01498318 | 23.24280486 | -1.02766 | 0.000104 |
| SOHLH2 ENSG00000120669 protein_coding    | 76.58939058 | 37.43480831 | -1.0322  | 0.000108 |
| SMCO1 ENSG00000214097 protein_coding     | 10.51623179 | 3.68422124  | -1.18461 | 0.000143 |
| UNC45B ENSG00000141161 protein_coding    | 85.66893047 | 38.60252523 | -1.14755 | 0.000157 |
| CCK ENSG00000187094 protein_coding       | 487.2643207 | 236.2525866 | -1.04426 | 0.000162 |

|                                               |             |             |          |          |
|-----------------------------------------------|-------------|-------------|----------|----------|
| PADI3 ENSG00000142619 protein_coding          | 23.00382365 | 13.21944642 | -1.21891 | 0.00017  |
| AL645922.1 ENSG00000244255 protein_coding     | 1.229628224 | 0.499431152 | -1.24265 | 0.000179 |
| SMR3B ENSG00000171201 protein_coding          | 8.113622766 | 1.253961016 | -2.55959 | 0.000179 |
| MT1B ENSG00000169688 protein_coding           | 5.91281192  | 2.874779366 | -1.03093 | 0.000209 |
| SYNPO2L ENSG00000166317 protein_coding        | 210.8570592 | 83.90491712 | -1.13823 | 0.000238 |
| MYOZ2 ENSG00000172399 protein_coding          | 187.6661135 | 56.46269316 | -1.07962 | 0.000242 |
| GPR101 ENSG00000165370 protein_coding         | 1.121478525 | 0.676456587 | -1.12937 | 0.0003   |
| FOX11 ENSG00000168269 protein_coding          | 97.08138605 | 60.6769044  | -1.17504 | 0.000411 |
| GCG ENSG00000115263 protein_coding            | 62.38311399 | 31.16127426 | -1.00294 | 0.000413 |
| TMPRSS11A ENSG00000187054 protein_coding      | 12.92899992 | 6.609850358 | -1.16014 | 0.000989 |
| LTF ENSG00000012223 protein_coding            | 53258.25965 | 26478.99387 | -1.00816 | 0.000994 |
| KRT76 ENSG00000185069 protein_coding          | 1.124908297 | 0.223242363 | -1.89764 | 0.001043 |
| AQP2 ENSG00000167580 protein_coding           | 15.1401635  | 27.38073868 | -1.16017 | 0.001295 |
| CCDC169-SOHLH2 ENSG00000250709 protein_coding | 10.1949359  | 5.060205381 | -1.00992 | 0.001463 |
| PRB2 ENSG00000121335 protein_coding           | 3.034004886 | 2.351427613 | -1.15953 | 0.001485 |
| XIRP1 ENSG00000168334 protein_coding          | 407.8698325 | 130.7846201 | -1.13502 | 0.001579 |
| MUC21 ENSG00000204544 protein_coding          | 6.042221701 | 2.701674889 | -1.17082 | 0.003069 |
| MYH7 ENSG00000092054 protein_coding           | 9037.346818 | 2264.53185  | -1.54054 | 0.003158 |
| CFC1B ENSG00000152093 protein_coding          | 7.112607503 | 1.509607433 | -1.23282 | 0.003182 |
| COL6A5 ENSG00000172752 protein_coding         | 6.10821019  | 1.61349633  | -1.17752 | 0.003241 |
| ATP1B4 ENSG00000101892 protein_coding         | 35.15788383 | 14.78485786 | -1.26883 | 0.003945 |
| AGBL1 ENSG00000273540 protein_coding          | 6.323147273 | 2.800885132 | -1.24167 | 0.004337 |

|                                          |             |             |          |          |
|------------------------------------------|-------------|-------------|----------|----------|
| TRDN ENSG00000186439 protein_coding      | 431.9605221 | 118.022926  | -1.1465  | 0.004815 |
| HJV ENSG00000168509 protein_coding       | 33.68809191 | 11.00055225 | -1.01048 | 0.005489 |
| MT4 ENSG00000102891 protein_coding       | 7.044827694 | 0.736210661 | -2.45756 | 0.005586 |
| ASB10 ENSG00000146926 protein_coding     | 10.99816741 | 3.872547751 | -1.33213 | 0.005918 |
| MYL2 ENSG00000111245 protein_coding      | 3405.787571 | 908.3121277 | -1.59721 | 0.006515 |
| FBXO40 ENSG00000163833 protein_coding    | 52.79586364 | 21.67732631 | -1.27171 | 0.006742 |
| C10orf71 ENSG00000177354 protein_coding  | 103.1343892 | 37.98173709 | -1.13185 | 0.009313 |
| DHRS7C ENSG00000184544 protein_coding    | 4.263257001 | 1.684705228 | -1.59992 | 0.009503 |
| CCDC63 ENSG00000173093 protein_coding    | 2.525748552 | 0.916000917 | -1.21202 | 0.009872 |
| MYL1 ENSG00000168530 protein_coding      | 1608.964058 | 465.820773  | -1.81765 | 0.0102   |
| LINC02203 ENSG00000280709 protein_coding | 1.615150367 | 0.724133182 | -1.16565 | 0.013417 |
| XIRP2 ENSG00000163092 protein_coding     | 782.9509806 | 250.8833846 | -1.73862 | 0.015205 |
| PRDM13 ENSG00000112238 protein_coding    | 0.875138597 | 0.356388349 | -1.24274 | 0.015351 |
| SPRR3 ENSG00000163209 protein_coding     | 6.993878582 | 2.64995672  | -1.11434 | 0.017151 |
| SBK2 ENSG00000187550 protein_coding      | 1.27510555  | 0.355635153 | -1.13642 | 0.019303 |
| KLHL40 ENSG00000157119 protein_coding    | 101.1023557 | 35.01172228 | -1.17705 | 0.019811 |
| LMOD2 ENSG00000170807 protein_coding     | 388.0128118 | 105.735601  | -1.13463 | 0.022634 |
| PPP1R3A ENSG00000154415 protein_coding   | 21.77228018 | 7.325828463 | -2.20773 | 0.030958 |
| DUPD1 ENSG00000188716 protein_coding     | 8.150130053 | 2.781372617 | -1.51904 | 0.041382 |
| OR10H2 ENSG00000171942 protein_coding    | 0.651935575 | 0.216054679 | -1.16703 | 0.042047 |
| SPAG11A ENSG00000178287 protein_coding   | 1.625139204 | 0.392717327 | -1.34003 | 0.045724 |
| OR1N2 ENSG00000171501 protein_coding     | 6.781910745 | 2.104023259 | -1.89915 | 0.047502 |
