# Supplementary material
Source: publisher site journal article supplement (https://static.cambridge.org/content/id/urn%3Acambridge.org%3Aid%3Aarticle%3AS001667230050072X/resource/name/S001667230050072Xsupp001.zip)
Supplement: Supplementary file 4 [file S001667230050072Xsupp001.zip]

**Supplementary Data3:genes with different frequency of CNVs between LRBM and HRBM cohort**

| Gene        | CNV ratio of LRBM cohort | CNV ratio of HRBM cohort | Stat     | Pvalue   | adjPvalue |
|-------------|--------------------------|--------------------------|----------|----------|-----------|
| CSMD3       | 0.118644                 | 0.409091                 | 39.57687 | 3.15E-10 | 6.00E-06  |
| TRMT12      | 0.088983                 | 0.393939                 | 47.60756 | 5.21E-12 | 9.91E-08  |
| TAT         | 0.097458                 | 0.295455                 | 22.29626 | 2.34E-06 | 0.044456  |
| TTPA        | 0.080508                 | 0.30303                  | 29.5054  | 5.58E-08 | 0.001061  |
| ADAMTS18    | 0.127119                 | 0.356061                 | 25.45059 | 4.54E-07 | 0.008635  |
| NAE1        | 0.059322                 | 0.234848                 | 22.69198 | 1.90E-06 | 0.03618   |
| OPRK1       | 0.067797                 | 0.310606                 | 36.29438 | 1.70E-09 | 3.23E-05  |
| MAF1        | 0.088983                 | 0.356061                 | 38.3313  | 5.97E-10 | 1.14E-05  |
| MT1F        | 0.050847                 | 0.242424                 | 27.72176 | 1.40E-07 | 0.002665  |
| MAPK15      | 0.088983                 | 0.356061                 | 38.3313  | 5.97E-10 | 1.14E-05  |
| STAU2       | 0.084746                 | 0.348485                 | 38.23476 | 6.27E-10 | 1.19E-05  |
| OSR2        | 0.09322                  | 0.393939                 | 45.79801 | 1.31E-11 | 2.49E-07  |
| FA2H        | 0.110169                 | 0.363636                 | 32.29363 | 1.33E-08 | 0.000252  |
| COQ9        | 0.050847                 | 0.242424                 | 27.72176 | 1.40E-07 | 0.002665  |
| UBR5        | 0.09322                  | 0.386364                 | 43.92067 | 3.42E-11 | 6.51E-07  |
| MROH6       | 0.088983                 | 0.356061                 | 38.3313  | 5.97E-10 | 1.14E-05  |
| CYP7A1      | 0.080508                 | 0.30303                  | 29.5054  | 5.58E-08 | 0.001061  |
| CTC-479C5.6 | 0.055085                 | 0.242424                 | 25.96278 | 3.48E-07 | 0.006622  |
| GPIHBP1     | 0.088983                 | 0.348485                 | 36.55736 | 1.48E-09 | 2.82E-05  |
| SLC7A6      | 0.059322                 | 0.242424                 | 24.30112 | 8.24E-07 | 0.015676  |
| LONP2       | 0.029661                 | 0.181818                 | 23.47133 | 1.27E-06 | 0.024123  |
| LRRCC1      | 0.101695                 | 0.356061                 | 33.56055 | 6.91E-09 | 0.000131  |
| GOT2        | 0.055085                 | 0.257576                 | 29.36496 | 6.00E-08 | 0.001141  |
| FAM96B      | 0.059322                 | 0.234848                 | 22.69198 | 1.90E-06 | 0.03618   |
| DNAJC5B     | 0.084746                 | 0.333333                 | 34.70179 | 3.84E-09 | 7.31E-05  |
| JPH1        | 0.088983                 | 0.356061                 | 38.3313  | 5.97E-10 | 1.14E-05  |
| NUDT7       | 0.127119                 | 0.356061                 | 25.45059 | 4.54E-07 | 0.008635  |
| OSGIN2      | 0.097458                 | 0.371212                 | 38.59102 | 5.23E-10 | 9.94E-06  |
| NLRC5       | 0.050847                 | 0.242424                 | 27.72176 | 1.40E-07 | 0.002665  |
| RAD21       | 0.101695                 | 0.386364                 | 40.53896 | 1.93E-10 | 3.67E-06  |
| B3GNT9      | 0.055085                 | 0.234848                 | 24.30645 | 8.22E-07 | 0.015632  |
| ATP6V1C1    | 0.09322                  | 0.393939                 | 45.79801 | 1.31E-11 | 2.49E-07  |
| ZNF572      | 0.088983                 | 0.393939                 | 47.60756 | 5.21E-12 | 9.91E-08  |
| BCAR1       | 0.114407                 | 0.356061                 | 29.2852  | 6.25E-08 | 0.001189  |
| MTDH        | 0.09322                  | 0.393939                 | 45.79801 | 1.31E-11 | 2.49E-07  |
| FAM110B     | 0.072034                 | 0.30303                  | 32.76502 | 1.04E-08 | 0.000198  |
| ZFP41       | 0.088983                 | 0.363636                 | 40.13285 | 2.37E-10 | 4.51E-06  |
| UBE2V2      | 0.072034                 | 0.287879                 | 29.35015 | 6.04E-08 | 0.001149  |
| RRM2B       | 0.09322                  | 0.386364                 | 43.92067 | 3.42E-11 | 6.51E-07  |
| ZBTB10      | 0.09322                  | 0.356061                 | 36.68223 | 1.39E-09 | 2.65E-05  |
| LY6E        | 0.088983                 | 0.363636                 | 40.13285 | 2.37E-10 | 4.51E-06  |

|               |          |          |          |          |          |
|---------------|----------|----------|----------|----------|----------|
| LYPD2         | 0.088983 | 0.363636 | 40.13285 | 2.37E-10 | 4.51E-06 |
| SHARPIN       | 0.088983 | 0.356061 | 38.3313  | 5.97E-10 | 1.14E-05 |
| HGH1          | 0.088983 | 0.348485 | 36.55736 | 1.48E-09 | 2.82E-05 |
| LYNX1         | 0.088983 | 0.363636 | 40.13285 | 2.37E-10 | 4.51E-06 |
| FNTA          | 0.122881 | 0.333333 | 22.27248 | 2.37E-06 | 0.04501  |
| RFWD3         | 0.105932 | 0.363636 | 33.75143 | 6.26E-09 | 0.000119 |
| WDR97         | 0.088983 | 0.356061 | 38.3313  | 5.97E-10 | 1.14E-05 |
| TP53          | 0.110169 | 0.318182 | 22.95415 | 1.66E-06 | 0.031566 |
| ZHX1          | 0.088983 | 0.378788 | 43.81719 | 3.61E-11 | 6.86E-07 |
| TMEM71        | 0.097458 | 0.393939 | 44.04758 | 3.20E-11 | 6.10E-07 |
| ZNRF1         | 0.122881 | 0.356061 | 26.68283 | 2.40E-07 | 0.004561 |
| PSMB10        | 0.055085 | 0.242424 | 25.96278 | 3.48E-07 | 0.006622 |
| CEBPD         | 0.072034 | 0.280303 | 27.68668 | 1.43E-07 | 0.002714 |
| SULF1         | 0.088983 | 0.348485 | 36.55736 | 1.48E-09 | 2.82E-05 |
| TRPS1         | 0.097458 | 0.393939 | 44.04758 | 3.20E-11 | 6.10E-07 |
| C8orf44-SGK3  | 0.084746 | 0.340909 | 36.45437 | 1.56E-09 | 2.97E-05 |
| LDHD          | 0.118644 | 0.356061 | 27.96047 | 1.24E-07 | 0.002356 |
| TERF2IP       | 0.122881 | 0.356061 | 26.68283 | 2.40E-07 | 0.004561 |
| DDX28         | 0.055085 | 0.242424 | 25.96278 | 3.48E-07 | 0.006622 |
| CLEC3A        | 0.131356 | 0.356061 | 24.2621  | 8.41E-07 | 0.015997 |
| RP11-26J3.4   | 0.09322  | 0.356061 | 36.68223 | 1.39E-09 | 2.65E-05 |
| DRC3          | 0.004237 | 0.121212 | 23.70053 | 1.13E-06 | 0.021414 |
| TERF1         | 0.080508 | 0.356061 | 41.81861 | 1.00E-10 | 1.91E-06 |
| GNAO1         | 0.050847 | 0.234848 | 26.01854 | 3.38E-07 | 0.006434 |
| PMP2          | 0.088983 | 0.363636 | 40.13285 | 2.37E-10 | 4.51E-06 |
| PKHD1L1       | 0.101695 | 0.401515 | 44.19669 | 2.97E-11 | 5.65E-07 |
| AC010287.1    | 0.055085 | 0.257576 | 29.36496 | 6.00E-08 | 0.001141 |
| TCEA1         | 0.067797 | 0.318182 | 38.10887 | 6.69E-10 | 1.27E-05 |
| ANXA13        | 0.088983 | 0.378788 | 43.81719 | 3.61E-11 | 6.86E-07 |
| RSPO2         | 0.097458 | 0.393939 | 44.04758 | 3.20E-11 | 6.10E-07 |
| SLC9A5        | 0.055085 | 0.234848 | 24.30645 | 8.22E-07 | 0.015632 |
| TRHR          | 0.105932 | 0.393939 | 40.71536 | 1.76E-10 | 3.35E-06 |
| PMFBP1        | 0.110169 | 0.325758 | 24.43059 | 7.70E-07 | 0.014657 |
| RP11-240B13.2 | 0.084746 | 0.393939 | 49.4786  | 2.01E-12 | 3.82E-08 |
| NPIP15        | 0.105932 | 0.348485 | 30.44512 | 3.43E-08 | 0.000653 |
| KBTBD11       | 0.20339  | 0.454545 | 24.55565 | 7.22E-07 | 0.013736 |
| RRAD          | 0.059322 | 0.234848 | 22.69198 | 1.90E-06 | 0.03618  |
| VCPIP1        | 0.080508 | 0.340909 | 38.16239 | 6.51E-10 | 1.24E-05 |
| OC90          | 0.084746 | 0.393939 | 49.4786  | 2.01E-12 | 3.82E-08 |
| GIN3          | 0.050847 | 0.25     | 29.4537  | 5.73E-08 | 0.00109  |
| FABP4         | 0.088983 | 0.363636 | 40.13285 | 2.37E-10 | 4.51E-06 |
| RABEP1        | 0.050847 | 0.234848 | 26.01854 | 3.38E-07 | 0.006434 |
| KCNS2         | 0.088983 | 0.401515 | 49.54176 | 1.94E-12 | 3.69E-08 |
| C8orf76       | 0.088983 | 0.378788 | 43.81719 | 3.61E-11 | 6.86E-07 |

|            |          |          |          |          |          |
|------------|----------|----------|----------|----------|----------|
| FABP5      | 0.088983 | 0.363636 | 40.13285 | 2.37E-10 | 4.51E-06 |
| XKR9       | 0.084746 | 0.348485 | 38.23476 | 6.27E-10 | 1.19E-05 |
| KIAA0196   | 0.088983 | 0.393939 | 47.60756 | 5.21E-12 | 9.91E-08 |
| TSNARE1    | 0.088983 | 0.356061 | 38.3313  | 5.97E-10 | 1.14E-05 |
| PSKH1      | 0.055085 | 0.242424 | 25.96278 | 3.48E-07 | 0.006622 |
| MAFA       | 0.088983 | 0.363636 | 40.13285 | 2.37E-10 | 4.51E-06 |
| HES7       | 0.067797 | 0.257576 | 24.37647 | 7.92E-07 | 0.015074 |
| MLKL       | 0.110169 | 0.363636 | 32.29363 | 1.33E-08 | 0.000252 |
| DPEP2      | 0.055085 | 0.242424 | 25.96278 | 3.48E-07 | 0.006622 |
| FAM84B     | 0.088983 | 0.393939 | 47.60756 | 5.21E-12 | 9.91E-08 |
| LRRC69     | 0.09322  | 0.363636 | 38.4505  | 5.62E-10 | 1.07E-05 |
| ARL2BP     | 0.050847 | 0.242424 | 27.72176 | 1.40E-07 | 0.002665 |
| PKD1L3     | 0.105932 | 0.310606 | 22.72338 | 1.87E-06 | 0.035593 |
| NFATC3     | 0.055085 | 0.242424 | 25.96278 | 3.48E-07 | 0.006622 |
| SMPD3      | 0.059322 | 0.242424 | 24.30112 | 8.24E-07 | 0.015676 |
| CMTM3      | 0.059322 | 0.25     | 25.94183 | 3.52E-07 | 0.006695 |
| GFOD2      | 0.055085 | 0.242424 | 25.96278 | 3.48E-07 | 0.006622 |
| AC100821.2 | 0.067797 | 0.310606 | 36.29438 | 1.70E-09 | 3.23E-05 |
| AGO2       | 0.088983 | 0.386364 | 45.69928 | 1.38E-11 | 2.62E-07 |
| CHD7       | 0.09322  | 0.295455 | 23.59547 | 1.19E-06 | 0.022616 |
| IMPAD1     | 0.072034 | 0.295455 | 31.04317 | 2.52E-08 | 0.00048  |
| ESRP1      | 0.088983 | 0.371212 | 41.96161 | 9.31E-11 | 1.77E-06 |
| SNAI2      | 0.072034 | 0.295455 | 31.04317 | 2.52E-08 | 0.00048  |
| FBXO43     | 0.09322  | 0.393939 | 45.79801 | 1.31E-11 | 2.49E-07 |
| KCNQ3      | 0.097458 | 0.393939 | 44.04758 | 3.20E-11 | 6.10E-07 |
| E2F5       | 0.09322  | 0.356061 | 36.68223 | 1.39E-09 | 2.65E-05 |
| SLC7A13    | 0.084746 | 0.363636 | 41.87726 | 9.72E-11 | 1.85E-06 |
| GSDMC      | 0.084746 | 0.393939 | 49.4786  | 2.01E-12 | 3.82E-08 |
| WWP1       | 0.088983 | 0.363636 | 40.13285 | 2.37E-10 | 4.51E-06 |
| CMTM1      | 0.059322 | 0.25     | 25.94183 | 3.52E-07 | 0.006695 |
| PCMTD1     | 0.067797 | 0.30303  | 34.5066  | 4.25E-09 | 8.08E-05 |
| PER1       | 0.067797 | 0.25     | 22.79482 | 1.80E-06 | 0.034295 |
| PARD6A     | 0.055085 | 0.234848 | 24.30645 | 8.22E-07 | 0.015632 |
| NUTF2      | 0.055085 | 0.242424 | 25.96278 | 3.48E-07 | 0.006622 |
| CDH17      | 0.09322  | 0.371212 | 40.24658 | 2.24E-10 | 4.26E-06 |
| RAB2A      | 0.09322  | 0.295455 | 23.59547 | 1.19E-06 | 0.022616 |
| ADCY8      | 0.084746 | 0.393939 | 49.4786  | 2.01E-12 | 3.82E-08 |
| C16orf86   | 0.055085 | 0.234848 | 24.30645 | 8.22E-07 | 0.015632 |
| CCDC79     | 0.059322 | 0.25     | 25.94183 | 3.52E-07 | 0.006695 |
| ADAT1      | 0.118644 | 0.348485 | 26.42383 | 2.74E-07 | 0.005216 |
| PTDSS1     | 0.09322  | 0.386364 | 43.92067 | 3.42E-11 | 6.51E-07 |
| PSMD7      | 0.105932 | 0.348485 | 30.44512 | 3.43E-08 | 0.000653 |
| ELP5       | 0.101695 | 0.30303  | 22.50389 | 2.10E-06 | 0.039901 |
| MT1B       | 0.050847 | 0.242424 | 27.72176 | 1.40E-07 | 0.002665 |

|               |          |          |          |          |          |
|---------------|----------|----------|----------|----------|----------|
| CCDC166       | 0.088983 | 0.356061 | 38.3313  | 5.97E-10 | 1.14E-05 |
| CLVS1         | 0.097458 | 0.30303  | 23.78495 | 1.08E-06 | 0.020495 |
| ABRA          | 0.09322  | 0.401515 | 47.7018  | 4.96E-12 | 9.44E-08 |
| ACSF3         | 0.122881 | 0.348485 | 25.17984 | 5.22E-07 | 0.009936 |
| BHLHE22       | 0.076271 | 0.318182 | 34.55182 | 4.15E-09 | 7.90E-05 |
| ERICH5        | 0.088983 | 0.393939 | 47.60756 | 5.21E-12 | 9.91E-08 |
| TNFRSF11B     | 0.09322  | 0.386364 | 43.92067 | 3.42E-11 | 6.51E-07 |
| COLEC10       | 0.097458 | 0.386364 | 42.20132 | 8.23E-11 | 1.57E-06 |
| CYP7B1        | 0.080508 | 0.325758 | 34.6147  | 4.02E-09 | 7.65E-05 |
| MTBP          | 0.09322  | 0.378788 | 42.07009 | 8.81E-11 | 1.68E-06 |
| ITFG1         | 0.029661 | 0.181818 | 23.47133 | 1.27E-06 | 0.024123 |
| LYPLA1        | 0.067797 | 0.310606 | 36.29438 | 1.70E-09 | 3.23E-05 |
| GID4          | 0.004237 | 0.121212 | 23.70053 | 1.13E-06 | 0.021414 |
| NDRG1         | 0.09322  | 0.393939 | 45.79801 | 1.31E-11 | 2.49E-07 |
| RB1CC1        | 0.063559 | 0.318182 | 40.00423 | 2.53E-10 | 4.82E-06 |
| TMEM74        | 0.101695 | 0.393939 | 42.35407 | 7.62E-11 | 1.45E-06 |
| LCAT          | 0.055085 | 0.242424 | 25.96278 | 3.48E-07 | 0.006622 |
| INTS8         | 0.088983 | 0.378788 | 43.81719 | 3.61E-11 | 6.86E-07 |
| TMEM170A      | 0.118644 | 0.356061 | 27.96047 | 1.24E-07 | 0.002356 |
| RP11-403P17.5 | 0.059322 | 0.25     | 25.94183 | 3.52E-07 | 0.006695 |
| USP6          | 0.04661  | 0.227273 | 26.11359 | 3.22E-07 | 0.006125 |
| RP11-77K12.7  | 0.118644 | 0.356061 | 27.96047 | 1.24E-07 | 0.002356 |
| STMN2         | 0.09322  | 0.348485 | 34.94219 | 3.40E-09 | 6.46E-05 |
| TAF2          | 0.097458 | 0.378788 | 40.38235 | 2.09E-10 | 3.97E-06 |
| LRRC36        | 0.055085 | 0.234848 | 24.30645 | 8.22E-07 | 0.015632 |
| KARS          | 0.122881 | 0.348485 | 25.17984 | 5.22E-07 | 0.009936 |
| PRDM14        | 0.084746 | 0.356061 | 40.04253 | 2.48E-10 | 4.73E-06 |
| HP            | 0.101695 | 0.318182 | 25.50461 | 4.41E-07 | 0.008397 |
| C8orf88       | 0.09322  | 0.363636 | 38.4505  | 5.62E-10 | 1.07E-05 |
| CES3          | 0.059322 | 0.234848 | 22.69198 | 1.90E-06 | 0.03618  |
| TRAPPC2L      | 0.122881 | 0.348485 | 25.17984 | 5.22E-07 | 0.009936 |
| ZNF696        | 0.088983 | 0.363636 | 40.13285 | 2.37E-10 | 4.51E-06 |
| SDCBP         | 0.080508 | 0.30303  | 29.5054  | 5.58E-08 | 0.001061 |
| KATNB1        | 0.050847 | 0.242424 | 27.72176 | 1.40E-07 | 0.002665 |
| CTRB2         | 0.114407 | 0.356061 | 29.2852  | 6.25E-08 | 0.001189 |
| ENY2          | 0.101695 | 0.393939 | 42.35407 | 7.62E-11 | 1.45E-06 |
| TPPP3         | 0.055085 | 0.234848 | 24.30645 | 8.22E-07 | 0.015632 |
| C16orf70      | 0.055085 | 0.234848 | 24.30645 | 8.22E-07 | 0.015632 |
| SCIMP         | 0.04661  | 0.227273 | 26.11359 | 3.22E-07 | 0.006125 |
| CKLF          | 0.059322 | 0.25     | 25.94183 | 3.52E-07 | 0.006695 |
| EDC4          | 0.055085 | 0.242424 | 25.96278 | 3.48E-07 | 0.006622 |
| MOS           | 0.067797 | 0.295455 | 32.74609 | 1.05E-08 | 0.0002   |
| FZD6          | 0.09322  | 0.393939 | 45.79801 | 1.31E-11 | 2.49E-07 |
| SNTB1         | 0.09322  | 0.378788 | 42.07009 | 8.81E-11 | 1.68E-06 |

|                |          |          |          |          |          |
|----------------|----------|----------|----------|----------|----------|
| BBS2           | 0.050847 | 0.25     | 29.4537  | 5.73E-08 | 0.00109  |
| BEAN1          | 0.059322 | 0.25     | 25.94183 | 3.52E-07 | 0.006695 |
| FAM92A1        | 0.09322  | 0.371212 | 40.24658 | 2.24E-10 | 4.26E-06 |
| MT1M           | 0.050847 | 0.242424 | 27.72176 | 1.40E-07 | 0.002665 |
| ZNF319         | 0.050847 | 0.242424 | 27.72176 | 1.40E-07 | 0.002665 |
| TK2            | 0.059322 | 0.25     | 25.94183 | 3.52E-07 | 0.006695 |
| PPP1R42        | 0.084746 | 0.340909 | 36.45437 | 1.56E-09 | 2.97E-05 |
| TG             | 0.101695 | 0.393939 | 42.35407 | 7.62E-11 | 1.45E-06 |
| DOK4           | 0.055085 | 0.242424 | 25.96278 | 3.48E-07 | 0.006622 |
| HERPUD1        | 0.050847 | 0.242424 | 27.72176 | 1.40E-07 | 0.002665 |
| ZNF469         | 0.148305 | 0.371212 | 22.6286  | 1.97E-06 | 0.037393 |
| CMTM4          | 0.059322 | 0.25     | 25.94183 | 3.52E-07 | 0.006695 |
| CHMP4C         | 0.088983 | 0.356061 | 38.3313  | 5.97E-10 | 1.14E-05 |
| CHST5          | 0.118644 | 0.356061 | 27.96047 | 1.24E-07 | 0.002356 |
| PSCA           | 0.088983 | 0.363636 | 40.13285 | 2.37E-10 | 4.51E-06 |
| CHST4          | 0.097458 | 0.295455 | 22.29626 | 2.34E-06 | 0.044456 |
| RPL7           | 0.084746 | 0.348485 | 38.23476 | 6.27E-10 | 1.19E-05 |
| CHST6          | 0.118644 | 0.356061 | 27.96047 | 1.24E-07 | 0.002356 |
| RGS20          | 0.067797 | 0.310606 | 36.29438 | 1.70E-09 | 3.23E-05 |
| KLHL38         | 0.088983 | 0.378788 | 43.81719 | 3.61E-11 | 6.86E-07 |
| VAT1L          | 0.131356 | 0.348485 | 22.82601 | 1.77E-06 | 0.033743 |
| POU5F1B        | 0.088983 | 0.401515 | 49.54176 | 1.94E-12 | 3.69E-08 |
| ATP6V0D1       | 0.055085 | 0.234848 | 24.30645 | 8.22E-07 | 0.015632 |
| TMEM68         | 0.076271 | 0.30303  | 31.09919 | 2.45E-08 | 0.000466 |
| RP11-1099M24.7 | 0.101695 | 0.310606 | 23.98776 | 9.70E-07 | 0.018446 |
| PAG1           | 0.09322  | 0.363636 | 38.4505  | 5.62E-10 | 1.07E-05 |
| FAM135B        | 0.101695 | 0.386364 | 40.53896 | 1.93E-10 | 3.67E-06 |
| GGH            | 0.080508 | 0.30303  | 29.5054  | 5.58E-08 | 0.001061 |
| RP1            | 0.072034 | 0.30303  | 32.76502 | 1.04E-08 | 0.000198 |
| ENPP2          | 0.097458 | 0.386364 | 42.20132 | 8.23E-11 | 1.57E-06 |
| TSTA3          | 0.088983 | 0.348485 | 36.55736 | 1.48E-09 | 2.82E-05 |
| MT1X           | 0.050847 | 0.234848 | 26.01854 | 3.38E-07 | 0.006434 |
| AC004158.1     | 0.110169 | 0.348485 | 29.05459 | 7.04E-08 | 0.001339 |
| SDC2           | 0.088983 | 0.386364 | 45.69928 | 1.38E-11 | 2.62E-07 |
| RNF166         | 0.122881 | 0.348485 | 25.17984 | 5.22E-07 | 0.009936 |
| NOV            | 0.097458 | 0.386364 | 42.20132 | 8.23E-11 | 1.57E-06 |
| UBE2W          | 0.084746 | 0.348485 | 38.23476 | 6.27E-10 | 1.19E-05 |
| ARFGEF1        | 0.084746 | 0.340909 | 36.45437 | 1.56E-09 | 2.97E-05 |
| DCAF13         | 0.09322  | 0.393939 | 45.79801 | 1.31E-11 | 2.49E-07 |
| CCNE2          | 0.088983 | 0.378788 | 43.81719 | 3.61E-11 | 6.86E-07 |
| RPL26          | 0.055085 | 0.227273 | 22.68139 | 1.91E-06 | 0.03638  |
| RP11-849F2.7   | 0.055085 | 0.227273 | 22.68139 | 1.91E-06 | 0.03638  |
| GALNS          | 0.122881 | 0.348485 | 25.17984 | 5.22E-07 | 0.009936 |
| SPATC1         | 0.088983 | 0.356061 | 38.3313  | 5.97E-10 | 1.14E-05 |

|               |          |          |          |          |          |
|---------------|----------|----------|----------|----------|----------|
| OTUD6B        | 0.09322  | 0.363636 | 38.4505  | 5.62E-10 | 1.07E-05 |
| E2F4          | 0.055085 | 0.242424 | 25.96278 | 3.48E-07 | 0.006622 |
| EIF3E         | 0.105932 | 0.393939 | 40.71536 | 1.76E-10 | 3.35E-06 |
| ZNF623        | 0.088983 | 0.356061 | 38.3313  | 5.97E-10 | 1.14E-05 |
| DHX38         | 0.105932 | 0.325758 | 25.7159  | 3.96E-07 | 0.007526 |
| PENK          | 0.072034 | 0.295455 | 31.04317 | 2.52E-08 | 0.00048  |
| PUF60         | 0.088983 | 0.356061 | 38.3313  | 5.97E-10 | 1.14E-05 |
| MRPL15        | 0.067797 | 0.310606 | 36.29438 | 1.70E-09 | 3.23E-05 |
| DCSTAMP       | 0.09322  | 0.409091 | 49.63179 | 1.85E-12 | 3.53E-08 |
| FAM83A        | 0.088983 | 0.378788 | 43.81719 | 3.61E-11 | 6.86E-07 |
| PDP1          | 0.09322  | 0.371212 | 40.24658 | 2.24E-10 | 4.26E-06 |
| EYA1          | 0.084746 | 0.348485 | 38.23476 | 6.27E-10 | 1.19E-05 |
| EXOSC4        | 0.084746 | 0.356061 | 40.04253 | 2.48E-10 | 4.73E-06 |
| TEPP          | 0.050847 | 0.242424 | 27.72176 | 1.40E-07 | 0.002665 |
| RP11-598P20.5 | 0.122881 | 0.348485 | 25.17984 | 5.22E-07 | 0.009936 |
| MAF           | 0.135593 | 0.356061 | 23.11585 | 1.53E-06 | 0.02902  |
| AC087350.1    | 0.101695 | 0.386364 | 40.53896 | 1.93E-10 | 3.67E-06 |
| SLA           | 0.097458 | 0.393939 | 44.04758 | 3.20E-11 | 6.10E-07 |
| RP11-343C2.11 | 0.067797 | 0.257576 | 24.37647 | 7.92E-07 | 0.015074 |
| EPPK1         | 0.088983 | 0.363636 | 40.13285 | 2.37E-10 | 4.51E-06 |
| FABP12        | 0.088983 | 0.356061 | 38.3313  | 5.97E-10 | 1.14E-05 |
| MED30         | 0.09322  | 0.393939 | 45.79801 | 1.31E-11 | 2.49E-07 |
| FAM192A       | 0.050847 | 0.242424 | 27.72176 | 1.40E-07 | 0.002665 |
| ZFP90         | 0.063559 | 0.242424 | 22.73077 | 1.86E-06 | 0.035457 |
| NDUF6F6       | 0.088983 | 0.378788 | 43.81719 | 3.61E-11 | 6.86E-07 |
| KHDRBS3       | 0.097458 | 0.393939 | 44.04758 | 3.20E-11 | 6.10E-07 |
| MAL2          | 0.097458 | 0.386364 | 42.20132 | 8.23E-11 | 1.57E-06 |
| AC010547.9    | 0.097458 | 0.295455 | 22.29626 | 2.34E-06 | 0.044456 |
| NECAB1        | 0.09322  | 0.363636 | 38.4505  | 5.62E-10 | 1.07E-05 |
| COPS5         | 0.084746 | 0.340909 | 36.45437 | 1.56E-09 | 2.97E-05 |
| ADGRG1        | 0.050847 | 0.242424 | 27.72176 | 1.40E-07 | 0.002665 |
| PREX2         | 0.097458 | 0.348485 | 33.3867  | 7.55E-09 | 0.000144 |
| AFAP1L2       | 0.008475 | 0.128788 | 22.62863 | 1.97E-06 | 0.037393 |
| MT1E          | 0.050847 | 0.242424 | 27.72176 | 1.40E-07 | 0.002665 |
| NAA38         | 0.105932 | 0.310606 | 22.72338 | 1.87E-06 | 0.035593 |
| AZIN1         | 0.09322  | 0.393939 | 45.79801 | 1.31E-11 | 2.49E-07 |
| EIF3H         | 0.097458 | 0.386364 | 42.20132 | 8.23E-11 | 1.57E-06 |
| CSNK2A2       | 0.050847 | 0.242424 | 27.72176 | 1.40E-07 | 0.002665 |
| PDE7A         | 0.080508 | 0.333333 | 36.37475 | 1.63E-09 | 3.10E-05 |
| DERL2         | 0.050847 | 0.219697 | 22.70249 | 1.89E-06 | 0.035982 |
| RANBP10       | 0.055085 | 0.242424 | 25.96278 | 3.48E-07 | 0.006622 |
| ZHX1-C8orf76  | 0.088983 | 0.378788 | 43.81719 | 3.61E-11 | 6.86E-07 |
| RP11-599B13.6 | 0.067797 | 0.25     | 22.79482 | 1.80E-06 | 0.034295 |
| RNF139        | 0.088983 | 0.386364 | 45.69928 | 1.38E-11 | 2.62E-07 |

|              |          |          |          |          |          |
|--------------|----------|----------|----------|----------|----------|
| WDYHV1       | 0.088983 | 0.378788 | 43.81719 | 3.61E-11 | 6.86E-07 |
| IMPA1        | 0.088983 | 0.356061 | 38.3313  | 5.97E-10 | 1.14E-05 |
| NDRG4        | 0.050847 | 0.257576 | 31.21344 | 2.31E-08 | 0.00044  |
| CPNE3        | 0.09322  | 0.363636 | 38.4505  | 5.62E-10 | 1.07E-05 |
| KCNB2        | 0.088983 | 0.356061 | 38.3313  | 5.97E-10 | 1.14E-05 |
| FAM83H       | 0.088983 | 0.356061 | 38.3313  | 5.97E-10 | 1.14E-05 |
| CCL22        | 0.055085 | 0.242424 | 25.96278 | 3.48E-07 | 0.006622 |
| JRK          | 0.088983 | 0.363636 | 40.13285 | 2.37E-10 | 4.51E-06 |
| GDAP1        | 0.088983 | 0.371212 | 41.96161 | 9.31E-11 | 1.77E-06 |
| CRH          | 0.080508 | 0.340909 | 38.16239 | 6.51E-10 | 1.24E-05 |
| NAPRT        | 0.088983 | 0.356061 | 38.3313  | 5.97E-10 | 1.14E-05 |
| RAP1GAP2     | 0.042373 | 0.212121 | 24.54063 | 7.28E-07 | 0.013843 |
| TMEM107      | 0.067797 | 0.25     | 22.79482 | 1.80E-06 | 0.034295 |
| TSNAXIP1     | 0.055085 | 0.242424 | 25.96278 | 3.48E-07 | 0.006622 |
| MROH1        | 0.088983 | 0.356061 | 38.3313  | 5.97E-10 | 1.14E-05 |
| TMEM65       | 0.088983 | 0.393939 | 47.60756 | 5.21E-12 | 9.91E-08 |
| AC129492.1   | 0.067797 | 0.25     | 22.79482 | 1.80E-06 | 0.034295 |
| NKAIN3       | 0.084746 | 0.30303  | 27.98021 | 1.23E-07 | 0.002332 |
| NUDCD1       | 0.101695 | 0.393939 | 42.35407 | 7.62E-11 | 1.45E-06 |
| KLF10        | 0.09322  | 0.393939 | 45.79801 | 1.31E-11 | 2.49E-07 |
| UQCRB        | 0.09322  | 0.386364 | 43.92067 | 3.42E-11 | 6.51E-07 |
| NSMCE2       | 0.088983 | 0.401515 | 49.54176 | 1.94E-12 | 3.69E-08 |
| CX3CL1       | 0.055085 | 0.242424 | 25.96278 | 3.48E-07 | 0.006622 |
| ZFP1         | 0.114407 | 0.356061 | 29.2852  | 6.25E-08 | 0.001189 |
| KRBA2        | 0.055085 | 0.227273 | 22.68139 | 1.91E-06 | 0.03638  |
| SNX31        | 0.097458 | 0.393939 | 44.04758 | 3.20E-11 | 6.10E-07 |
| KIFC3        | 0.050847 | 0.242424 | 27.72176 | 1.40E-07 | 0.002665 |
| RP11-343C2.9 | 0.067797 | 0.257576 | 24.37647 | 7.92E-07 | 0.015074 |
| MYBL1        | 0.080508 | 0.340909 | 38.16239 | 6.51E-10 | 1.24E-05 |
| SGK3         | 0.084746 | 0.340909 | 36.45437 | 1.56E-09 | 2.97E-05 |
| LY96         | 0.084746 | 0.348485 | 38.23476 | 6.27E-10 | 1.19E-05 |
| MATN2        | 0.088983 | 0.393939 | 47.60756 | 5.21E-12 | 9.91E-08 |
| RPS20        | 0.072034 | 0.295455 | 31.04317 | 2.52E-08 | 0.00048  |
| TMEM88       | 0.105932 | 0.310606 | 22.72338 | 1.87E-06 | 0.035593 |
| PABPN1L      | 0.122881 | 0.348485 | 25.17984 | 5.22E-07 | 0.009936 |
| EFR3A        | 0.084746 | 0.401515 | 51.44303 | 7.37E-13 | 1.40E-08 |
| FTO          | 0.055085 | 0.234848 | 24.30645 | 8.22E-07 | 0.015632 |
| NRBP2        | 0.088983 | 0.363636 | 40.13285 | 2.37E-10 | 4.51E-06 |
| LYN          | 0.067797 | 0.295455 | 32.74609 | 1.05E-08 | 0.0002   |
| RPL30        | 0.088983 | 0.393939 | 47.60756 | 5.21E-12 | 9.91E-08 |
| NCALD        | 0.088983 | 0.393939 | 47.60756 | 5.21E-12 | 9.91E-08 |
| MTFR1        | 0.080508 | 0.325758 | 34.6147  | 4.02E-09 | 7.65E-05 |
| NDUFB9       | 0.088983 | 0.393939 | 47.60756 | 5.21E-12 | 9.91E-08 |
| CTU2         | 0.122881 | 0.348485 | 25.17984 | 5.22E-07 | 0.009936 |

|               |          |          |          |          |          |
|---------------|----------|----------|----------|----------|----------|
| C8orf46       | 0.084746 | 0.340909 | 36.45437 | 1.56E-09 | 2.97E-05 |
| DHODH         | 0.101695 | 0.310606 | 23.98776 | 9.70E-07 | 0.018446 |
| CFAP20        | 0.050847 | 0.242424 | 27.72176 | 1.40E-07 | 0.002665 |
| CLDN7         | 0.101695 | 0.30303  | 22.50389 | 2.10E-06 | 0.039901 |
| ADGRG3        | 0.050847 | 0.242424 | 27.72176 | 1.40E-07 | 0.002665 |
| KCNV1         | 0.088983 | 0.409091 | 51.50162 | 7.15E-13 | 1.36E-08 |
| SAMD12        | 0.110169 | 0.393939 | 39.12945 | 3.97E-10 | 7.55E-06 |
| MRPS28        | 0.09322  | 0.356061 | 36.68223 | 1.39E-09 | 2.65E-05 |
| AARD          | 0.101695 | 0.386364 | 40.53896 | 1.93E-10 | 3.67E-06 |
| TOX3          | 0.059322 | 0.234848 | 22.69198 | 1.90E-06 | 0.03618  |
| FSBP          | 0.09322  | 0.371212 | 40.24658 | 2.24E-10 | 4.26E-06 |
| WDR59         | 0.122881 | 0.371212 | 29.7847  | 4.83E-08 | 0.000919 |
| CES2          | 0.059322 | 0.234848 | 22.69198 | 1.90E-06 | 0.03618  |
| DSCC1         | 0.097458 | 0.378788 | 40.38235 | 2.09E-10 | 3.97E-06 |
| CA13          | 0.09322  | 0.356061 | 36.68223 | 1.39E-09 | 2.65E-05 |
| WISP1         | 0.097458 | 0.393939 | 44.04758 | 3.20E-11 | 6.10E-07 |
| RPAIN         | 0.050847 | 0.219697 | 22.70249 | 1.89E-06 | 0.035982 |
| RP11-457D20.2 | 0.050847 | 0.265152 | 33.00016 | 9.22E-09 | 0.000175 |
| DENND3        | 0.088983 | 0.378788 | 43.81719 | 3.61E-11 | 6.86E-07 |
| NSMAF         | 0.080508 | 0.30303  | 29.5054  | 5.58E-08 | 0.001061 |
| SCRIB         | 0.088983 | 0.356061 | 38.3313  | 5.97E-10 | 1.14E-05 |
| GUCY2D        | 0.097458 | 0.295455 | 22.29626 | 2.34E-06 | 0.044456 |
| XKR4          | 0.076271 | 0.30303  | 31.09919 | 2.45E-08 | 0.000466 |
| RP11-463D19.2 | 0.084746 | 0.348485 | 38.23476 | 6.27E-10 | 1.19E-05 |
| HNF4G         | 0.097458 | 0.356061 | 35.09278 | 3.14E-09 | 5.98E-05 |
| CNOT1         | 0.055085 | 0.257576 | 29.36496 | 6.00E-08 | 0.001141 |
| DYNLRB2       | 0.131356 | 0.348485 | 22.82601 | 1.77E-06 | 0.033743 |
| IL17C         | 0.122881 | 0.348485 | 25.17984 | 5.22E-07 | 0.009936 |
| CMTR2         | 0.097458 | 0.295455 | 22.29626 | 2.34E-06 | 0.044456 |
| PKIA          | 0.09322  | 0.348485 | 34.94219 | 3.40E-09 | 6.46E-05 |
| LAPTM4B       | 0.088983 | 0.393939 | 47.60756 | 5.21E-12 | 9.91E-08 |
| C8orf22       | 0.067797 | 0.280303 | 29.30944 | 6.17E-08 | 0.001174 |
| ASAP1         | 0.088983 | 0.401515 | 49.54176 | 1.94E-12 | 3.69E-08 |
| CSPP1         | 0.084746 | 0.340909 | 36.45437 | 1.56E-09 | 2.97E-05 |
| ARHGEF10      | 0.216102 | 0.469697 | 24.40775 | 7.80E-07 | 0.014832 |
| NUP88         | 0.050847 | 0.227273 | 24.34508 | 8.05E-07 | 0.015322 |
| SLC45A4       | 0.088983 | 0.378788 | 43.81719 | 3.61E-11 | 6.86E-07 |
| VPS4A         | 0.067797 | 0.257576 | 24.37647 | 7.92E-07 | 0.015074 |
| FAM49B        | 0.084746 | 0.393939 | 49.4786  | 2.01E-12 | 3.82E-08 |
| BAALC         | 0.09322  | 0.393939 | 45.79801 | 1.31E-11 | 2.49E-07 |
| CES4A         | 0.059322 | 0.234848 | 22.69198 | 1.90E-06 | 0.03618  |
| CKLF-CMTM1    | 0.059322 | 0.25     | 25.94183 | 3.52E-07 | 0.006695 |
| TCEB1         | 0.084746 | 0.348485 | 38.23476 | 6.27E-10 | 1.19E-05 |
| TRADD         | 0.055085 | 0.234848 | 24.30645 | 8.22E-07 | 0.015632 |



|              |          |          |          |          |          |
|--------------|----------|----------|----------|----------|----------|
| CHCHD7       | 0.067797 | 0.295455 | 32.74609 | 1.05E-08 | 0.0002   |
| CRISPLD1     | 0.084746 | 0.356061 | 40.04253 | 2.48E-10 | 4.73E-06 |
| LRRC6        | 0.09322  | 0.393939 | 45.79801 | 1.31E-11 | 2.49E-07 |
| ZFHX4        | 0.097458 | 0.363636 | 36.8277  | 1.29E-09 | 2.46E-05 |
| CFDP1        | 0.127119 | 0.356061 | 25.45059 | 4.54E-07 | 0.008635 |
| ACD          | 0.055085 | 0.234848 | 24.30645 | 8.22E-07 | 0.015632 |
| NIP7         | 0.067797 | 0.257576 | 24.37647 | 7.92E-07 | 0.015074 |
| RUNX1T1      | 0.09322  | 0.371212 | 40.24658 | 2.24E-10 | 4.26E-06 |
| ATPAF2       | 0.004237 | 0.121212 | 23.70053 | 1.13E-06 | 0.021414 |
| CHRA1        | 0.088983 | 0.378788 | 43.81719 | 3.61E-11 | 6.86E-07 |
| MTSS1        | 0.088983 | 0.401515 | 49.54176 | 1.94E-12 | 3.69E-08 |
| ARMC1        | 0.080508 | 0.325758 | 34.6147  | 4.02E-09 | 7.65E-05 |
| DCAF4L2      | 0.084746 | 0.356061 | 40.04253 | 2.48E-10 | 4.73E-06 |
| TATDN1       | 0.088983 | 0.393939 | 47.60756 | 5.21E-12 | 9.91E-08 |
| MRPL13       | 0.09322  | 0.378788 | 42.07009 | 8.81E-11 | 1.68E-06 |
| TMEM208      | 0.055085 | 0.242424 | 25.96278 | 3.48E-07 | 0.006622 |
| RP11-58C22.1 | 0.127119 | 0.363636 | 26.95268 | 2.08E-07 | 0.003967 |
| CLN8         | 0.20339  | 0.454545 | 24.55565 | 7.22E-07 | 0.013736 |
| ZFP3         | 0.042373 | 0.219697 | 26.2533  | 2.99E-07 | 0.005697 |
| FAM65A       | 0.055085 | 0.234848 | 24.30645 | 8.22E-07 | 0.015632 |
| TRIB1        | 0.088983 | 0.393939 | 47.60756 | 5.21E-12 | 9.91E-08 |
| CCDC113      | 0.050847 | 0.242424 | 27.72176 | 1.40E-07 | 0.002665 |
| ALOX15B      | 0.09322  | 0.295455 | 23.59547 | 1.19E-06 | 0.022616 |
| COX6C        | 0.088983 | 0.393939 | 47.60756 | 5.21E-12 | 9.91E-08 |
| SLC12A4      | 0.055085 | 0.242424 | 25.96278 | 3.48E-07 | 0.006622 |
| SLCO5A1      | 0.09322  | 0.348485 | 34.94219 | 3.40E-09 | 6.46E-05 |
| ZNF707       | 0.088983 | 0.356061 | 38.3313  | 5.97E-10 | 1.14E-05 |
| TMED6        | 0.067797 | 0.257576 | 24.37647 | 7.92E-07 | 0.015074 |
| ZDHC1        | 0.055085 | 0.234848 | 24.30645 | 8.22E-07 | 0.015632 |
| LRP12        | 0.09322  | 0.409091 | 49.63179 | 1.85E-12 | 3.53E-08 |
| NIPAL2       | 0.088983 | 0.393939 | 47.60756 | 5.21E-12 | 9.91E-08 |
| TRAPPC9      | 0.110169 | 0.378788 | 35.65305 | 2.36E-09 | 4.49E-05 |
| MT2A         | 0.050847 | 0.242424 | 27.72176 | 1.40E-07 | 0.002665 |
| EMC2         | 0.101695 | 0.393939 | 42.35407 | 7.62E-11 | 1.45E-06 |
| AC007906.1   | 0.055085 | 0.227273 | 22.68139 | 1.91E-06 | 0.03638  |
| SLC22A31     | 0.122881 | 0.348485 | 25.17984 | 5.22E-07 | 0.009936 |
| CYBA         | 0.122881 | 0.348485 | 25.17984 | 5.22E-07 | 0.009936 |
| HSF4         | 0.055085 | 0.234848 | 24.30645 | 8.22E-07 | 0.015632 |
| UBXN2B       | 0.080508 | 0.30303  | 29.5054  | 5.58E-08 | 0.001061 |
| CTHRC1       | 0.09322  | 0.401515 | 47.7018  | 4.96E-12 | 9.44E-08 |
| CA8          | 0.084746 | 0.287879 | 24.80131 | 6.36E-07 | 0.012092 |
| YWHAZ        | 0.09322  | 0.401515 | 47.7018  | 4.96E-12 | 9.44E-08 |
| CCDC102A     | 0.050847 | 0.242424 | 27.72176 | 1.40E-07 | 0.002665 |
| HRSP12       | 0.088983 | 0.393939 | 47.60756 | 5.21E-12 | 9.91E-08 |

|            |          |          |          |          |          |
|------------|----------|----------|----------|----------|----------|
| SETD6      | 0.050847 | 0.257576 | 31.21344 | 2.31E-08 | 0.00044  |
| PTK2       | 0.088983 | 0.378788 | 43.81719 | 3.61E-11 | 6.86E-07 |
| LPCAT2     | 0.055085 | 0.234848 | 24.30645 | 8.22E-07 | 0.015632 |
| TMEM64     | 0.088983 | 0.363636 | 40.13285 | 2.37E-10 | 4.51E-06 |
| RDH10      | 0.084746 | 0.348485 | 38.23476 | 6.27E-10 | 1.19E-05 |
| LRRC29     | 0.055085 | 0.242424 | 25.96278 | 3.48E-07 | 0.006622 |
| MT1H       | 0.050847 | 0.242424 | 27.72176 | 1.40E-07 | 0.002665 |
| SLC6A2     | 0.050847 | 0.227273 | 24.34508 | 8.05E-07 | 0.015322 |
| PYCRL      | 0.088983 | 0.356061 | 38.3313  | 5.97E-10 | 1.14E-05 |
| CALB1      | 0.097458 | 0.363636 | 36.8277  | 1.29E-09 | 2.46E-05 |
| PEX2       | 0.097458 | 0.356061 | 35.09278 | 3.14E-09 | 5.98E-05 |
| CETP       | 0.050847 | 0.242424 | 27.72176 | 1.40E-07 | 0.002665 |
| RNF19A     | 0.09322  | 0.393939 | 45.79801 | 1.31E-11 | 2.49E-07 |
| GDF6       | 0.097458 | 0.386364 | 42.20132 | 8.23E-11 | 1.57E-06 |
| GPAA1      | 0.088983 | 0.356061 | 38.3313  | 5.97E-10 | 1.14E-05 |
| TCF24      | 0.084746 | 0.340909 | 36.45437 | 1.56E-09 | 2.97E-05 |
| EEF1D      | 0.088983 | 0.356061 | 38.3313  | 5.97E-10 | 1.14E-05 |
| ZNF23      | 0.097458 | 0.295455 | 22.29626 | 2.34E-06 | 0.044456 |
| MT1A       | 0.055085 | 0.25     | 27.64928 | 1.45E-07 | 0.002767 |
| AMFR       | 0.050847 | 0.25     | 29.4537  | 5.73E-08 | 0.00109  |
| AC104581.1 | 0.105932 | 0.310606 | 22.72338 | 1.87E-06 | 0.035593 |
| RHPN1      | 0.09322  | 0.363636 | 38.4505  | 5.62E-10 | 1.07E-05 |
| KIAA1429   | 0.09322  | 0.363636 | 38.4505  | 5.62E-10 | 1.07E-05 |
| ATAD2      | 0.09322  | 0.378788 | 42.07009 | 8.81E-11 | 1.68E-06 |
| TRIM55     | 0.080508 | 0.340909 | 38.16239 | 6.51E-10 | 1.24E-05 |
| IRX3       | 0.050847 | 0.242424 | 27.72176 | 1.40E-07 | 0.002665 |
| DUS2       | 0.055085 | 0.242424 | 25.96278 | 3.48E-07 | 0.006622 |
| FAM91A1    | 0.088983 | 0.386364 | 45.69928 | 1.38E-11 | 2.62E-07 |
| GLG1       | 0.110169 | 0.363636 | 32.29363 | 1.33E-08 | 0.000252 |
| MYC        | 0.088983 | 0.401515 | 49.54176 | 1.94E-12 | 3.69E-08 |
| ASPH       | 0.084746 | 0.30303  | 27.98021 | 1.23E-07 | 0.002332 |
| C8orf44    | 0.080508 | 0.340909 | 38.16239 | 6.51E-10 | 1.24E-05 |
| ZC2HC1A    | 0.09322  | 0.348485 | 34.94219 | 3.40E-09 | 6.46E-05 |
| ZNF594     | 0.04661  | 0.227273 | 26.11359 | 3.22E-07 | 0.006125 |
| C8orf34    | 0.084746 | 0.340909 | 36.45437 | 1.56E-09 | 2.97E-05 |
| FER1L6     | 0.088983 | 0.393939 | 47.60756 | 5.21E-12 | 9.91E-08 |
| OPLAH      | 0.088983 | 0.356061 | 38.3313  | 5.97E-10 | 1.14E-05 |
| MT1G       | 0.050847 | 0.242424 | 27.72176 | 1.40E-07 | 0.002665 |
| GML        | 0.088983 | 0.363636 | 40.13285 | 2.37E-10 | 4.51E-06 |
| ANKRD11    | 0.122881 | 0.340909 | 23.70953 | 1.12E-06 | 0.021314 |
| STK3       | 0.097458 | 0.393939 | 44.04758 | 3.20E-11 | 6.10E-07 |
| SYCE1L     | 0.127119 | 0.356061 | 25.45059 | 4.54E-07 | 0.008635 |
| CTRL       | 0.055085 | 0.242424 | 25.96278 | 3.48E-07 | 0.006622 |
| AGRP       | 0.055085 | 0.234848 | 24.30645 | 8.22E-07 | 0.015632 |

|                |          |          |          |          |          |
|----------------|----------|----------|----------|----------|----------|
| ALOX12B        | 0.067797 | 0.265152 | 25.99009 | 3.43E-07 | 0.006529 |
| DRG2           | 0.004237 | 0.121212 | 23.70053 | 1.13E-06 | 0.021414 |
| CNTROB         | 0.101695 | 0.310606 | 23.98776 | 9.70E-07 | 0.018446 |
| TMEM70         | 0.084746 | 0.348485 | 38.23476 | 6.27E-10 | 1.19E-05 |
| SLC38A7        | 0.059322 | 0.257576 | 27.61304 | 1.48E-07 | 0.002819 |
| EFCAB1         | 0.072034 | 0.287879 | 29.35015 | 6.04E-08 | 0.001149 |
| ZFPM2          | 0.110169 | 0.393939 | 39.12945 | 3.97E-10 | 7.55E-06 |
| ABCC12         | 0.029661 | 0.181818 | 23.47133 | 1.27E-06 | 0.024123 |
| ZHX2           | 0.09322  | 0.386364 | 43.92067 | 3.42E-11 | 6.51E-07 |
| SNTB2          | 0.072034 | 0.257576 | 22.88168 | 1.72E-06 | 0.032779 |
| CYP11B2        | 0.088983 | 0.363636 | 40.13285 | 2.37E-10 | 4.51E-06 |
| OGFOD1         | 0.050847 | 0.25     | 29.4537  | 5.73E-08 | 0.00109  |
| DEPTOR         | 0.097458 | 0.378788 | 40.38235 | 2.09E-10 | 3.97E-06 |
| PLA2G15        | 0.059322 | 0.242424 | 24.30112 | 8.24E-07 | 0.015676 |
| PHF23          | 0.097458 | 0.295455 | 22.29626 | 2.34E-06 | 0.044456 |
| ATP6V0D2       | 0.088983 | 0.363636 | 40.13285 | 2.37E-10 | 4.51E-06 |
| CNBD1          | 0.09322  | 0.363636 | 38.4505  | 5.62E-10 | 1.07E-05 |
| MCM4           | 0.072034 | 0.280303 | 27.68668 | 1.43E-07 | 0.002714 |
| TOP1MT         | 0.088983 | 0.363636 | 40.13285 | 2.37E-10 | 4.51E-06 |
| VPS35          | 0.029661 | 0.181818 | 23.47133 | 1.27E-06 | 0.024123 |
| LY6K           | 0.088983 | 0.363636 | 40.13285 | 2.37E-10 | 4.51E-06 |
| SDR16C5        | 0.067797 | 0.295455 | 32.74609 | 1.05E-08 | 0.0002   |
| CPNE2          | 0.055085 | 0.242424 | 25.96278 | 3.48E-07 | 0.006622 |
| THEM6          | 0.088983 | 0.363636 | 40.13285 | 2.37E-10 | 4.51E-06 |
| CDH15          | 0.122881 | 0.348485 | 25.17984 | 5.22E-07 | 0.009936 |
| DERL1          | 0.09322  | 0.378788 | 42.07009 | 8.81E-11 | 1.68E-06 |
| IRX5           | 0.055085 | 0.227273 | 22.68139 | 1.91E-06 | 0.03638  |
| RP11-343C2.12  | 0.067797 | 0.257576 | 24.37647 | 7.92E-07 | 0.015074 |
| SOX17          | 0.067797 | 0.30303  | 34.5066  | 4.25E-09 | 8.08E-05 |
| VAMP2          | 0.067797 | 0.25     | 22.79482 | 1.80E-06 | 0.034295 |
| ADGRG5         | 0.050847 | 0.242424 | 27.72176 | 1.40E-07 | 0.002665 |
| TPD52          | 0.097458 | 0.356061 | 35.09278 | 3.14E-09 | 5.98E-05 |
| PDF            | 0.067797 | 0.257576 | 24.37647 | 7.92E-07 | 0.015074 |
| N4BP1          | 0.029661 | 0.181818 | 23.47133 | 1.27E-06 | 0.024123 |
| RP11-249C24.12 | 0.050847 | 0.242424 | 27.72176 | 1.40E-07 | 0.002665 |
| CDH16          | 0.059322 | 0.234848 | 22.69198 | 1.90E-06 | 0.03618  |
| RP11-77K12.1   | 0.131356 | 0.356061 | 24.2621  | 8.41E-07 | 0.015997 |
| RGS22          | 0.097458 | 0.393939 | 44.04758 | 3.20E-11 | 6.10E-07 |
| SPIDR          | 0.076271 | 0.287879 | 27.76286 | 1.37E-07 | 0.002609 |
| RNF222         | 0.055085 | 0.227273 | 22.68139 | 1.91E-06 | 0.03638  |
| CYB5B          | 0.072034 | 0.257576 | 22.88168 | 1.72E-06 | 0.032779 |
| CNGB3          | 0.101695 | 0.363636 | 35.26208 | 2.88E-09 | 5.48E-05 |
| TRAPPC1        | 0.101695 | 0.310606 | 23.98776 | 9.70E-07 | 0.018446 |
| SLURP1         | 0.088983 | 0.363636 | 40.13285 | 2.37E-10 | 4.51E-06 |

|                     |          |          |          |          |          |
|---------------------|----------|----------|----------|----------|----------|
| <b>RALYL</b>        | 0.097458 | 0.371212 | 38.59102 | 5.23E-10 | 9.94E-06 |
| <b>ELMO3</b>        | 0.055085 | 0.242424 | 25.96278 | 3.48E-07 | 0.006622 |
| <b>PLAG1</b>        | 0.067797 | 0.30303  | 34.5066  | 4.25E-09 | 8.08E-05 |
| <b>ZNF232</b>       | 0.04661  | 0.219697 | 24.42137 | 7.74E-07 | 0.014727 |
| <b>HSD11B2</b>      | 0.055085 | 0.234848 | 24.30645 | 8.22E-07 | 0.015632 |
| <b>ZFAND1</b>       | 0.088983 | 0.356061 | 38.3313  | 5.97E-10 | 1.14E-05 |
| <b>PHF20L1</b>      | 0.101695 | 0.393939 | 42.35407 | 7.62E-11 | 1.45E-06 |
| <b>CNGB1</b>        | 0.050847 | 0.242424 | 27.72176 | 1.40E-07 | 0.002665 |
| <b>ZBTB16</b>       | 0.021186 | 0.159091 | 22.46305 | 2.14E-06 | 0.040759 |
| <b>YTHDF3</b>       | 0.076271 | 0.30303  | 31.09919 | 2.45E-08 | 0.000466 |
| <b>PRMT7</b>        | 0.059322 | 0.242424 | 24.30112 | 8.24E-07 | 0.015676 |
| <b>GSDMD</b>        | 0.088983 | 0.356061 | 38.3313  | 5.97E-10 | 1.14E-05 |
| <b>FBXO32</b>       | 0.088983 | 0.378788 | 43.81719 | 3.61E-11 | 6.86E-07 |
| <b>BORCS6</b>       | 0.067797 | 0.25     | 22.79482 | 1.80E-06 | 0.034295 |
| <b>PLEKHF2</b>      | 0.088983 | 0.378788 | 43.81719 | 3.61E-11 | 6.86E-07 |
| <b>CYB5D1</b>       | 0.105932 | 0.310606 | 22.72338 | 1.87E-06 | 0.035593 |
| <b>DPEP3</b>        | 0.055085 | 0.242424 | 25.96278 | 3.48E-07 | 0.006622 |
| <b>RP13-582O9.6</b> | 0.088983 | 0.363636 | 40.13285 | 2.37E-10 | 4.51E-06 |
| <b>CMTM2</b>        | 0.059322 | 0.25     | 25.94183 | 3.52E-07 | 0.006695 |
| <b>ZC3H18</b>       | 0.122881 | 0.348485 | 25.17984 | 5.22E-07 | 0.009936 |
| <b>EBAG9</b>        | 0.097458 | 0.393939 | 44.04758 | 3.20E-11 | 6.10E-07 |
| <b>C8orf59</b>      | 0.09322  | 0.356061 | 36.68223 | 1.39E-09 | 2.65E-05 |
| <b>PIEZO1</b>       | 0.122881 | 0.348485 | 25.17984 | 5.22E-07 | 0.009936 |
| <b>RAD54B</b>       | 0.09322  | 0.371212 | 40.24658 | 2.24E-10 | 4.26E-06 |
| <b>HEY1</b>         | 0.09322  | 0.348485 | 34.94219 | 3.40E-09 | 6.46E-05 |
| <b>FBXL8</b>        | 0.055085 | 0.234848 | 24.30645 | 8.22E-07 | 0.015632 |
| <b>CA3</b>          | 0.09322  | 0.356061 | 36.68223 | 1.39E-09 | 2.65E-05 |
| <b>ZNF778</b>       | 0.122881 | 0.356061 | 26.68283 | 2.40E-07 | 0.004561 |
| <b>HLA1</b>         | 0.088983 | 0.393939 | 47.60756 | 5.21E-12 | 9.91E-08 |
| <b>SNAI3</b>        | 0.122881 | 0.348485 | 25.17984 | 5.22E-07 | 0.009936 |
| <b>ZNF704</b>       | 0.09322  | 0.356061 | 36.68223 | 1.39E-09 | 2.65E-05 |
| <b>TRIQK</b>        | 0.09322  | 0.371212 | 40.24658 | 2.24E-10 | 4.26E-06 |
| <b>MTERF3</b>       | 0.09322  | 0.386364 | 43.92067 | 3.42E-11 | 6.51E-07 |
| <b>ATP6V1H</b>      | 0.067797 | 0.318182 | 38.10887 | 6.69E-10 | 1.27E-05 |
| <b>CBFA2T3</b>      | 0.122881 | 0.348485 | 25.17984 | 5.22E-07 | 0.009936 |
| <b>GEM</b>          | 0.09322  | 0.371212 | 40.24658 | 2.24E-10 | 4.26E-06 |
| <b>POLR2C</b>       | 0.050847 | 0.242424 | 27.72176 | 1.40E-07 | 0.002665 |
| <b>DRC7</b>         | 0.050847 | 0.242424 | 27.72176 | 1.40E-07 | 0.002665 |
| <b>ESRP2</b>        | 0.055085 | 0.242424 | 25.96278 | 3.48E-07 | 0.006622 |
| <b>MMP2</b>         | 0.050847 | 0.227273 | 24.34508 | 8.05E-07 | 0.015322 |
| <b>HAS2</b>         | 0.097458 | 0.378788 | 40.38235 | 2.09E-10 | 3.97E-06 |
| <b>SLC26A7</b>      | 0.09322  | 0.371212 | 40.24658 | 2.24E-10 | 4.26E-06 |
| <b>C8orf37</b>      | 0.09322  | 0.378788 | 42.07009 | 8.81E-11 | 1.68E-06 |
| <b>YBX2</b>         | 0.105932 | 0.310606 | 22.72338 | 1.87E-06 | 0.035593 |

|            |          |          |          |          |          |
|------------|----------|----------|----------|----------|----------|
| PLEKHG4    | 0.055085 | 0.234848 | 24.30645 | 8.22E-07 | 0.015632 |
| EXT1       | 0.101695 | 0.393939 | 42.35407 | 7.62E-11 | 1.45E-06 |
| MT3        | 0.050847 | 0.242424 | 27.72176 | 1.40E-07 | 0.002665 |
| CLEC18B    | 0.105932 | 0.348485 | 30.44512 | 3.43E-08 | 0.000653 |
| RMDN1      | 0.088983 | 0.363636 | 40.13285 | 2.37E-10 | 4.51E-06 |
| RBM12B     | 0.09322  | 0.371212 | 40.24658 | 2.24E-10 | 4.26E-06 |
| PSKH2      | 0.088983 | 0.363636 | 40.13285 | 2.37E-10 | 4.51E-06 |
| KCNAB3     | 0.105932 | 0.310606 | 22.72338 | 1.87E-06 | 0.035593 |
| KCNK9      | 0.097458 | 0.378788 | 40.38235 | 2.09E-10 | 3.97E-06 |
| TXNL4B     | 0.105932 | 0.325758 | 25.7159  | 3.96E-07 | 0.007526 |
| COL22A1    | 0.09322  | 0.378788 | 42.07009 | 8.81E-11 | 1.68E-06 |
| ZC3H3      | 0.088983 | 0.363636 | 40.13285 | 2.37E-10 | 4.51E-06 |
| TMEM55A    | 0.09322  | 0.363636 | 38.4505  | 5.62E-10 | 1.07E-05 |
| AC105009.1 | 0.088983 | 0.378788 | 43.81719 | 3.61E-11 | 6.86E-07 |
| DYNC1LI2   | 0.059322 | 0.25     | 25.94183 | 3.52E-07 | 0.006695 |
| THAP11     | 0.055085 | 0.242424 | 25.96278 | 3.48E-07 | 0.006622 |
| NRN1L      | 0.055085 | 0.242424 | 25.96278 | 3.48E-07 | 0.006622 |
| ST18       | 0.063559 | 0.318182 | 40.00423 | 2.53E-10 | 4.82E-06 |
| CES1       | 0.050847 | 0.234848 | 26.01854 | 3.38E-07 | 0.006434 |
| PLLP       | 0.055085 | 0.242424 | 25.96278 | 3.48E-07 | 0.006622 |
| CTRB1      | 0.114407 | 0.356061 | 29.2852  | 6.25E-08 | 0.001189 |
| PXDNL      | 0.080508 | 0.310606 | 31.17944 | 2.35E-08 | 0.000448 |
| ZFAT       | 0.097458 | 0.393939 | 44.04758 | 3.20E-11 | 6.10E-07 |
| ST3GAL1    | 0.097458 | 0.393939 | 44.04758 | 3.20E-11 | 6.10E-07 |
| TP53INP1   | 0.088983 | 0.378788 | 43.81719 | 3.61E-11 | 6.86E-07 |
| COG8       | 0.067797 | 0.257576 | 24.37647 | 7.92E-07 | 0.015074 |
| CENPT      | 0.055085 | 0.242424 | 25.96278 | 3.48E-07 | 0.006622 |
| HYDIN      | 0.097458 | 0.295455 | 22.29626 | 2.34E-06 | 0.044456 |
| TOX        | 0.084746 | 0.318182 | 31.28212 | 2.23E-08 | 0.000425 |
| CDH5       | 0.055085 | 0.25     | 27.64928 | 1.45E-07 | 0.002767 |
| PARP10     | 0.088983 | 0.363636 | 40.13285 | 2.37E-10 | 4.51E-06 |
| APRT       | 0.122881 | 0.348485 | 25.17984 | 5.22E-07 | 0.009936 |
| RRS1       | 0.084746 | 0.340909 | 36.45437 | 1.56E-09 | 2.97E-05 |
| RIMS2      | 0.105932 | 0.401515 | 42.52727 | 6.97E-11 | 1.33E-06 |
| CPQ        | 0.09322  | 0.393939 | 45.79801 | 1.31E-11 | 2.49E-07 |
| MARVELD3   | 0.097458 | 0.295455 | 22.29626 | 2.34E-06 | 0.044456 |
| ODF1       | 0.09322  | 0.393939 | 45.79801 | 1.31E-11 | 2.49E-07 |
| VPS13B     | 0.09322  | 0.393939 | 45.79801 | 1.31E-11 | 2.49E-07 |
| SBSPON     | 0.084746 | 0.348485 | 38.23476 | 6.27E-10 | 1.19E-05 |
| PRSS54     | 0.050847 | 0.242424 | 27.72176 | 1.40E-07 | 0.002665 |
| PLEC       | 0.088983 | 0.363636 | 40.13285 | 2.37E-10 | 4.51E-06 |
| ANKRD46    | 0.09322  | 0.393939 | 45.79801 | 1.31E-11 | 2.49E-07 |
| ERICH1     | 0.207627 | 0.454545 | 23.58762 | 1.19E-06 | 0.022708 |
| CBFB       | 0.059322 | 0.234848 | 22.69198 | 1.90E-06 | 0.03618  |

|              |          |          |          |          |          |
|--------------|----------|----------|----------|----------|----------|
| AC138028.1   | 0.122881 | 0.348485 | 25.17984 | 5.22E-07 | 0.009936 |
| RP11-343C2.7 | 0.067797 | 0.257576 | 24.37647 | 7.92E-07 | 0.015074 |
| SPAG1        | 0.09322  | 0.393939 | 45.79801 | 1.31E-11 | 2.49E-07 |
| DPY19L4      | 0.088983 | 0.371212 | 41.96161 | 9.31E-11 | 1.77E-06 |
| MVD          | 0.122881 | 0.348485 | 25.17984 | 5.22E-07 | 0.009936 |
| ARC          | 0.088983 | 0.363636 | 40.13285 | 2.37E-10 | 4.51E-06 |
| SNTG1        | 0.084746 | 0.310606 | 29.61614 | 5.27E-08 | 0.001002 |
| SLC10A5      | 0.088983 | 0.356061 | 38.3313  | 5.97E-10 | 1.14E-05 |
| SLC7A6OS     | 0.059322 | 0.242424 | 24.30112 | 8.24E-07 | 0.015676 |
| DPYS         | 0.09322  | 0.409091 | 49.63179 | 1.85E-12 | 3.53E-08 |
| CAPNS2       | 0.050847 | 0.227273 | 24.34508 | 8.05E-07 | 0.015322 |
| RSPRY1       | 0.050847 | 0.242424 | 27.72176 | 1.40E-07 | 0.002665 |
| PTP4A3       | 0.088983 | 0.356061 | 38.3313  | 5.97E-10 | 1.14E-05 |
| AC108925.1   | 0.088983 | 0.401515 | 49.54176 | 1.94E-12 | 3.69E-08 |
| TIGD5        | 0.088983 | 0.356061 | 38.3313  | 5.97E-10 | 1.14E-05 |
| MON1B        | 0.127119 | 0.356061 | 25.45059 | 4.54E-07 | 0.008635 |
| CTC-479C5.12 | 0.055085 | 0.242424 | 25.96278 | 3.48E-07 | 0.006622 |
| CDH11        | 0.059322 | 0.25     | 25.94183 | 3.52E-07 | 0.006695 |
| CDH8         | 0.055085 | 0.265152 | 31.10892 | 2.44E-08 | 0.000464 |
| NCOA2        | 0.084746 | 0.363636 | 41.87726 | 9.72E-11 | 1.85E-06 |
| AC026248.1   | 0.088983 | 0.393939 | 47.60756 | 5.21E-12 | 9.91E-08 |
| POP1         | 0.088983 | 0.393939 | 47.60756 | 5.21E-12 | 9.91E-08 |
| NUDT21       | 0.050847 | 0.25     | 29.4537  | 5.73E-08 | 0.00109  |
| CA1          | 0.09322  | 0.356061 | 36.68223 | 1.39E-09 | 2.65E-05 |
| LY6D         | 0.088983 | 0.363636 | 40.13285 | 2.37E-10 | 4.51E-06 |
| AC090154.1   | 0.080508 | 0.340909 | 38.16239 | 6.51E-10 | 1.24E-05 |
| CIAPIN1      | 0.055085 | 0.242424 | 25.96278 | 3.48E-07 | 0.006622 |
| GLI4         | 0.088983 | 0.363636 | 40.13285 | 2.37E-10 | 4.51E-06 |
| IL7          | 0.09322  | 0.348485 | 34.94219 | 3.40E-09 | 6.46E-05 |
| RLTPR        | 0.055085 | 0.234848 | 24.30645 | 8.22E-07 | 0.015632 |
| NPBWR1       | 0.067797 | 0.310606 | 36.29438 | 1.70E-09 | 3.23E-05 |
| NETO2        | 0.029661 | 0.181818 | 23.47133 | 1.27E-06 | 0.024123 |
| SLC25A32     | 0.09322  | 0.393939 | 45.79801 | 1.31E-11 | 2.49E-07 |
| CA2          | 0.088983 | 0.356061 | 38.3313  | 5.97E-10 | 1.14E-05 |
| SQLE         | 0.088983 | 0.393939 | 47.60756 | 5.21E-12 | 9.91E-08 |
| CYC1         | 0.088983 | 0.356061 | 38.3313  | 5.97E-10 | 1.14E-05 |
| PDP2         | 0.059322 | 0.234848 | 22.69198 | 1.90E-06 | 0.03618  |
| PRKDC        | 0.076271 | 0.287879 | 27.76286 | 1.37E-07 | 0.002609 |
| KCTD19       | 0.059322 | 0.234848 | 22.69198 | 1.90E-06 | 0.03618  |
| TSPYL5       | 0.088983 | 0.393939 | 47.60756 | 5.21E-12 | 9.91E-08 |
| NOL3         | 0.055085 | 0.242424 | 25.96278 | 3.48E-07 | 0.006622 |
| ZFH3         | 0.127119 | 0.371212 | 28.48687 | 9.43E-08 | 0.001795 |
| MCMD2C2      | 0.084746 | 0.340909 | 36.45437 | 1.56E-09 | 2.97E-05 |
| FHOD1        | 0.055085 | 0.242424 | 25.96278 | 3.48E-07 | 0.006622 |

|               |          |          |          |          |          |
|---------------|----------|----------|----------|----------|----------|
| TRAM1         | 0.084746 | 0.348485 | 38.23476 | 6.27E-10 | 1.19E-05 |
| IST1          | 0.101695 | 0.30303  | 22.50389 | 2.10E-06 | 0.039901 |
| SLC30A8       | 0.101695 | 0.393939 | 42.35407 | 7.62E-11 | 1.45E-06 |
| ADGRB1        | 0.088983 | 0.363636 | 40.13285 | 2.37E-10 | 4.51E-06 |
| GRHL2         | 0.09322  | 0.393939 | 45.79801 | 1.31E-11 | 2.49E-07 |
| NUP93         | 0.050847 | 0.242424 | 27.72176 | 1.40E-07 | 0.002665 |
| CPA6          | 0.09322  | 0.340909 | 33.23083 | 8.18E-09 | 0.000156 |
| EXOC3L1       | 0.055085 | 0.242424 | 25.96278 | 3.48E-07 | 0.006622 |
| UTP23         | 0.101695 | 0.386364 | 40.53896 | 1.93E-10 | 3.67E-06 |
| GPR20         | 0.088983 | 0.356061 | 38.3313  | 5.97E-10 | 1.14E-05 |
| RIPK2         | 0.097458 | 0.363636 | 36.8277  | 1.29E-09 | 2.46E-05 |
| RP11-5A19.5   | 0.055085 | 0.234848 | 24.30645 | 8.22E-07 | 0.015632 |
| CNTNAP4       | 0.127119 | 0.363636 | 26.95268 | 2.08E-07 | 0.003967 |
| ANGPT1        | 0.088983 | 0.401515 | 49.54176 | 1.94E-12 | 3.69E-08 |
| RP11-520P18.5 | 0.088983 | 0.363636 | 40.13285 | 2.37E-10 | 4.51E-06 |
| FAM150A       | 0.063559 | 0.325758 | 41.88063 | 9.70E-11 | 1.85E-06 |
| C8orf89       | 0.084746 | 0.348485 | 38.23476 | 6.27E-10 | 1.19E-05 |
| CTCF          | 0.055085 | 0.234848 | 24.30645 | 8.22E-07 | 0.015632 |
| MSC           | 0.080508 | 0.356061 | 41.81861 | 1.00E-10 | 1.91E-06 |
| NBN           | 0.09322  | 0.363636 | 38.4505  | 5.62E-10 | 1.07E-05 |
| LY6H          | 0.088983 | 0.363636 | 40.13285 | 2.37E-10 | 4.51E-06 |
| CDT1          | 0.122881 | 0.348485 | 25.17984 | 5.22E-07 | 0.009936 |
| RP1-4G17.5    | 0.101695 | 0.30303  | 22.50389 | 2.10E-06 | 0.039901 |
| CHD3          | 0.105932 | 0.310606 | 22.72338 | 1.87E-06 | 0.035593 |
| TERF2         | 0.072034 | 0.257576 | 22.88168 | 1.72E-06 | 0.032779 |
| MT4           | 0.050847 | 0.242424 | 27.72176 | 1.40E-07 | 0.002665 |
| CYP11B1       | 0.088983 | 0.363636 | 40.13285 | 2.37E-10 | 4.51E-06 |
| ENKD1         | 0.055085 | 0.234848 | 24.30645 | 8.22E-07 | 0.015632 |
| TBC1D31       | 0.09322  | 0.378788 | 42.07009 | 8.81E-11 | 1.68E-06 |
| SLC12A3       | 0.050847 | 0.242424 | 27.72176 | 1.40E-07 | 0.002665 |
| POLR2K        | 0.09322  | 0.393939 | 45.79801 | 1.31E-11 | 2.49E-07 |
| TGS1          | 0.067797 | 0.30303  | 34.5066  | 4.25E-09 | 8.08E-05 |
| ZNF706        | 0.09322  | 0.401515 | 47.7018  | 4.96E-12 | 9.44E-08 |
| DECR1         | 0.09322  | 0.371212 | 40.24658 | 2.24E-10 | 4.26E-06 |
| USB1          | 0.050847 | 0.242424 | 27.72176 | 1.40E-07 | 0.002665 |
| GRINA         | 0.088983 | 0.363636 | 40.13285 | 2.37E-10 | 4.51E-06 |
| MYOM2         | 0.207627 | 0.454545 | 23.58762 | 1.19E-06 | 0.022708 |
| SYBU          | 0.101695 | 0.393939 | 42.35407 | 7.62E-11 | 1.45E-06 |
| CA7           | 0.059322 | 0.234848 | 22.69198 | 1.90E-06 | 0.03618  |
| SLC52A1       | 0.042373 | 0.204545 | 22.85774 | 1.74E-06 | 0.03319  |
| TRPA1         | 0.084746 | 0.356061 | 40.04253 | 2.48E-10 | 4.73E-06 |
| TMEM67        | 0.09322  | 0.371212 | 40.24658 | 2.24E-10 | 4.26E-06 |
| MMP16         | 0.09322  | 0.371212 | 40.24658 | 2.24E-10 | 4.26E-06 |
| GABARAPL2     | 0.118644 | 0.356061 | 27.96047 | 1.24E-07 | 0.002356 |

|                   |          |          |          |          |          |
|-------------------|----------|----------|----------|----------|----------|
| <b>CCL17</b>      | 0.055085 | 0.242424 | 25.96278 | 3.48E-07 | 0.006622 |
| <b>PI15</b>       | 0.088983 | 0.363636 | 40.13285 | 2.37E-10 | 4.51E-06 |
| <b>OXR1</b>       | 0.101695 | 0.401515 | 44.19669 | 2.97E-11 | 5.65E-07 |
| <b>LACTB2</b>     | 0.080508 | 0.348485 | 39.97716 | 2.57E-10 | 4.89E-06 |
| <b>MIS12</b>      | 0.050847 | 0.219697 | 22.70249 | 1.89E-06 | 0.035982 |
| <b>TMEM231</b>    | 0.118644 | 0.356061 | 27.96047 | 1.24E-07 | 0.002356 |
| <b>KIAA0895L</b>  | 0.055085 | 0.242424 | 25.96278 | 3.48E-07 | 0.006622 |
| <b>MMP15</b>      | 0.050847 | 0.242424 | 27.72176 | 1.40E-07 | 0.002665 |
| <b>C1QBP</b>      | 0.050847 | 0.219697 | 22.70249 | 1.89E-06 | 0.035982 |
| <b>ALOXE3</b>     | 0.067797 | 0.265152 | 25.99009 | 3.43E-07 | 0.006529 |
| <b>NDEL1</b>      | 0.055085 | 0.227273 | 22.68139 | 1.91E-06 | 0.03638  |
| <b>COL14A1</b>    | 0.097458 | 0.378788 | 40.38235 | 2.09E-10 | 3.97E-06 |
| <b>FABP9</b>      | 0.088983 | 0.363636 | 40.13285 | 2.37E-10 | 4.51E-06 |
| <b>AC092384.1</b> | 0.122881 | 0.348485 | 25.17984 | 5.22E-07 | 0.009936 |
| <b>ADHFE1</b>     | 0.084746 | 0.340909 | 36.45437 | 1.56E-09 | 2.97E-05 |
| <b>HPR</b>        | 0.101695 | 0.318182 | 25.50461 | 4.41E-07 | 0.008397 |
| <b>PABPC1</b>     | 0.09322  | 0.401515 | 47.7018  | 4.96E-12 | 9.44E-08 |
| <b>CES5A</b>      | 0.050847 | 0.242424 | 27.72176 | 1.40E-07 | 0.002665 |
| <b>SNX16</b>      | 0.088983 | 0.356061 | 38.3313  | 5.97E-10 | 1.14E-05 |
