# Supplementary material
Source: publisher site journal article supplement (https://static.cambridge.org/content/id/urn%3Acambridge.org%3Aid%3Aarticle%3AS001667230050072X/resource/name/S001667230050072Xsupp001.zip)
Supplement: Supplementary file 5 [file S001667230050072Xsupp001.zip]

| Supplementary Data5:gene module |                                               |           |          |           |          |              |
|---------------------------------|-----------------------------------------------|-----------|----------|-----------|----------|--------------|
|                                 | datSummary                                    | colorNEW  | kMEblue  | kMEbrown  | kMEgrey  | kMEturquoise |
|                                 | FAM72D ENSG00000215784 protein_coding         | grey      | 0.708538 | 0.130757  | 0.74014  | -0.03295     |
|                                 | SAA2 ENSG00000134339 protein_coding           | grey      | -0.02689 | -0.016215 | -0.06813 | 0.068339     |
|                                 | SYNPO2L ENSG00000166317 protein_coding        | turquoise | -0.04079 | 0.00295   | -0.05209 | 0.980131     |
|                                 | OR10H2 ENSG00000171942 protein_coding         | grey      | 0.020286 | -0.024189 | 0.0031   | 0.012115     |
|                                 | GPR101 ENSG00000165370 protein_coding         | grey      | -0.0145  | 0.012201  | -0.01935 | -0.0198      |
|                                 | MATN4 ENSG00000124159 protein_coding          | grey      | 0.137382 | 0.032197  | 0.179573 | -0.02499     |
|                                 | CLEC4M ENSG00000104938 protein_coding         | grey      | -0.05894 | -0.008131 | -0.09525 | 0.013686     |
|                                 | PTK6 ENSG00000101213 protein_coding           | grey      | 0.190749 | 0.135568  | 0.273276 | -0.01964     |
|                                 | PLAC1 ENSG00000170965 protein_coding          | grey      | 0.113541 | 0.023664  | 0.155201 | -0.02709     |
|                                 | LHX2 ENSG00000106689 protein_coding           | grey      | 0.412536 | 0.075592  | 0.435859 | -0.03519     |
|                                 | LINC02203 ENSG00000280709 protein_coding      | grey      | -0.05995 | -0.059543 | -0.06311 | -0.00978     |
|                                 | MYT1 ENSG00000196132 protein_coding           | grey      | 0.21321  | 0.0548    | 0.276522 | -0.02923     |
|                                 | BARX1 ENSG00000131668 protein_coding          | grey      | 0.198373 | 0.091532  | 0.28465  | -0.03957     |
|                                 | MGAM2 ENSG00000257743 protein_coding          | grey      | 0.036477 | -0.011993 | -0.0297  | 0.006753     |
|                                 | UBE2C ENSG00000175063 protein_coding          | grey      | 0.696829 | 0.137121  | 0.669936 | -0.02347     |
|                                 | SAA2-SAA4 ENSG00000255071 protein_coding      | grey      | -0.02489 | -0.013635 | -0.06717 | 0.072517     |
|                                 | CCDC169-SOHLH2 ENSG00000250709 protein_coding | grey      | 0.010032 | -0.02318  | -0.04838 | 0.028994     |
|                                 | OPRK1 ENSG00000082556 protein_coding          | grey      | 0.147786 | 0.051215  | 0.206227 | -0.03618     |
|                                 | CCDC63 ENSG00000173093 protein_coding         | turquoise | -0.03536 | -0.007094 | -0.03784 | 0.98056      |
|                                 | SYT4 ENSG00000132872 protein_coding           | grey      | 0.411353 | -0.004869 | 0.415204 | -0.02723     |

|                                       |           |          |           |          |          |
|---------------------------------------|-----------|----------|-----------|----------|----------|
| WFDC5 ENSG00000175121 protein_coding  | grey      | 0.417262 | 0.084452  | 0.403188 | 0.002522 |
| OR51D1 ENSG00000197428 protein_coding | grey      | 0.083567 | -0.025599 | 0.134769 | -0.04136 |
| RP1 ENSG00000104237 protein_coding    | grey      | 0.170711 | 0.197935  | 0.21314  | 0.0005   |
| NCAM2 ENSG00000154654 protein_coding  | grey      | 0.083729 | 0.04519   | 0.121752 | 0.009838 |
| XIRP2 ENSG00000163092 protein_coding  | turquoise | -0.03731 | 0.003567  | -0.04594 | 0.979414 |
| PBK ENSG00000168078 protein_coding    | grey      | 0.855127 | 0.089476  | 0.828201 | -0.05342 |
| HOXB5 ENSG00000120075 protein_coding  | grey      | 0.077946 | 0.061968  | 0.103341 | 0.020719 |
| CENPF ENSG00000117724 protein_coding  | blue      | 0.968444 | 0.215681  | 0.918528 | -0.04272 |
| AGBL1 ENSG00000273540 protein_coding  | turquoise | -0.06081 | -0.008704 | -0.06117 | 0.95484  |
| CD38 ENSG00000004468 protein_coding   | grey      | -0.13826 | -0.083584 | -0.23631 | -0.04821 |
| MYBL2 ENSG00000101057 protein_coding  | grey      | 0.873483 | 0.211091  | 0.893683 | -0.03777 |
| KIF14 ENSG00000118193 protein_coding  | blue      | 0.961224 | 0.180317  | 0.899674 | -0.0341  |
| MAGEA1 ENSG00000198681 protein_coding | grey      | -0.02489 | -0.005069 | -0.00457 | -0.01444 |
| TLX1 ENSG00000107807 protein_coding   | grey      | 0.163426 | 0.040813  | 0.236071 | -0.02364 |
| CDK1 ENSG00000170312 protein_coding   | grey      | 0.851966 | 0.16795   | 0.814787 | -0.03922 |
| SPRR3 ENSG00000163209 protein_coding  | grey      | -0.03676 | -0.013636 | -0.06744 | -0.00085 |
| IL36RN ENSG00000136695 protein_coding | grey      | 0.4655   | 0.08981   | 0.492637 | -0.02474 |
| CARD18 ENSG00000255501 protein_coding | grey      | -0.00095 | 0.018374  | 0.015416 | -0.01087 |
| SAA1 ENSG00000173432 protein_coding   | grey      | -0.04396 | -0.021841 | -0.08525 | 0.059488 |
| ESPL1 ENSG00000135476 protein_coding  | blue      | 0.95722  | 0.18191   | 0.918147 | -0.04512 |
| CST2 ENSG00000170369 protein_coding   | grey      | 0.00796  | 0.023809  | 0.044999 | -0.01983 |
| HJURP ENSG00000123485 protein_coding  | grey      | 0.84462  | 0.168602  | 0.85183  | -0.04279 |

|                                           |           |          |           |          |          |
|-------------------------------------------|-----------|----------|-----------|----------|----------|
| SERPINA4 ENSG00000100665 protein_coding   | grey      | -0.01022 | -0.03137  | 0.02828  | -0.02859 |
| POLQ ENSG00000051341 protein_coding       | grey      | 0.921509 | 0.203037  | 0.906684 | -0.04798 |
| TICRR ENSG00000140534 protein_coding      | grey      | 0.893099 | 0.199134  | 0.869845 | -0.05358 |
| SCGB3A1 ENSG00000161055 protein_coding    | grey      | -0.08938 | -0.041125 | -0.11336 | -0.01793 |
| DGKK ENSG00000274588 protein_coding       | grey      | 0.212273 | 0.001726  | 0.200031 | -0.01552 |
| KIF15 ENSG00000163808 protein_coding      | grey      | 0.901807 | 0.178059  | 0.875054 | -0.05769 |
| TTC29 ENSG00000137473 protein_coding      | grey      | 0.125814 | 0.061689  | 0.193026 | -0.02887 |
| AL645922.1 ENSG00000244255 protein_coding | grey      | -0.00752 | 0.008677  | -0.07837 | 0.041142 |
| ASF1B ENSG00000105011 protein_coding      | grey      | 0.894014 | 0.157184  | 0.904168 | -0.05795 |
| SLC18A2 ENSG00000165646 protein_coding    | grey      | -0.08333 | -0.042052 | -0.17661 | -0.03323 |
| OTOP3 ENSG00000182938 protein_coding      | grey      | 0.02678  | 0.00381   | 0.073428 | -0.01252 |
| TOP2A ENSG00000131747 protein_coding      | blue      | 0.973786 | 0.196228  | 0.907167 | -0.04434 |
| TG ENSG00000042832 protein_coding         | grey      | -0.01793 | 0.017026  | -0.0288  | -0.00989 |
| GPR149 ENSG00000174948 protein_coding     | grey      | 0.122607 | 0.01528   | 0.14095  | -0.00849 |
| KIF18B ENSG00000186185 protein_coding     | grey      | 0.934042 | 0.154176  | 0.938413 | -0.03887 |
| NRAP ENSG00000197893 protein_coding       | turquoise | -0.04943 | -0.001148 | -0.0593  | 0.994551 |
| SBK2 ENSG00000187550 protein_coding       | grey      | -0.0353  | -0.015049 | -0.04528 | 0.407534 |
| AL928654.3 ENSG00000257341 protein_coding | grey      | 0.097383 | 0.063926  | 0.135174 | 0.064835 |
| MYL2 ENSG00000111245 protein_coding       | turquoise | -0.04548 | -0.00412  | -0.04855 | 0.990211 |
| IFI44L ENSG00000137959 protein_coding     | grey      | 0.267554 | 0.207362  | 0.336605 | -0.02725 |
| TGM6 ENSG00000166948 protein_coding       | grey      | 0.121361 | 0.010676  | 0.110427 | 0.004149 |
| UHRF1 ENSG00000276043 protein_coding      | grey      | 0.905331 | 0.172366  | 0.889679 | -0.0481  |

|                                         |      |          |           |          |          |
|-----------------------------------------|------|----------|-----------|----------|----------|
| KRT9 ENSG00000171403 protein_coding     | grey | -0.15486 | -0.0672   | -0.21914 | 0.009507 |
| SLC17A1 ENSG00000124568 protein_coding  | grey | 0.055087 | -0.032692 | 0.120819 | -0.02849 |
| OR1N2 ENSG00000171501 protein_coding    | grey | -0.01668 | -0.017087 | -0.01195 | 0.004853 |
| KCNK4 ENSG00000182450 protein_coding    | grey | 0.109006 | 0.096813  | 0.202559 | -0.0155  |
| DEPDC1B ENSG00000035499 protein_coding  | grey | 0.539815 | 0.096577  | 0.533996 | -0.04188 |
| SERPINI1 ENSG00000163536 protein_coding | grey | 0.063722 | 0.085572  | 0.154145 | -0.01364 |
| RAMACL ENSG00000235272 protein_coding   | grey | -0.00203 | -0.003917 | -0.03258 | 0.081519 |
| STMN2 ENSG00000104435 protein_coding    | grey | 0.160832 | 0.538057  | 0.191203 | -0.02438 |
| CDKN3 ENSG00000100526 protein_coding    | grey | 0.919004 | 0.18494   | 0.925067 | -0.02731 |
| ODF3L2 ENSG00000181781 protein_coding   | grey | 0.147451 | 0.035137  | 0.234618 | -0.02196 |
| SOX11 ENSG00000176887 protein_coding    | grey | 0.377182 | 0.650935  | 0.393464 | 0.020068 |
| PRB2 ENSG00000121335 protein_coding     | grey | 0.004867 | -0.016391 | -0.00277 | -0.01572 |
| AKR1C4 ENSG00000198610 protein_coding   | grey | 0.064403 | -0.002128 | 0.137104 | -0.02227 |
| KRT75 ENSG00000170454 protein_coding    | grey | 0.181045 | 0.637762  | 0.241309 | -0.02421 |
| CRISP3 ENSG00000096006 protein_coding   | grey | 0.052625 | 0.021676  | 0.069283 | -0.04431 |
| SERPINA3 ENSG00000196136 protein_coding | grey | -0.05393 | -0.023237 | -0.09422 | 0.101524 |
| GRIK1 ENSG00000171189 protein_coding    | grey | 0.082945 | -0.002262 | 0.126186 | -0.01593 |
| VGLL3 ENSG00000206538 protein_coding    | grey | -0.0346  | -0.024528 | -0.0758  | 0.037684 |
| GFAP ENSG00000131095 protein_coding     | grey | 0.028779 | 0.029377  | 0.030355 | 0.022865 |
| NEK2 ENSG00000117650 protein_coding     | blue | 0.949871 | 0.18728   | 0.932826 | -0.05233 |
| ADAM18 ENSG00000168619 protein_coding   | grey | 0.343062 | 0.091019  | 0.389996 | -0.04126 |
| PCARE ENSG00000179270 protein_coding    | grey | -0.12075 | -0.031477 | -0.16507 | 0.800459 |

|                                        |           |          |           |          |          |
|----------------------------------------|-----------|----------|-----------|----------|----------|
| COL10A1 ENSG00000123500 protein_coding | brown     | 0.155687 | 0.980714  | 0.188752 | -0.01704 |
| GCG ENSG00000115263 protein_coding     | grey      | -0.05735 | -0.030207 | -0.07317 | -0.03077 |
| GABRQ ENSG00000268089 protein_coding   | grey      | -0.1696  | -0.063881 | -0.25829 | -0.04272 |
| ACTA1 ENSG00000143632 protein_coding   | turquoise | -0.049   | -0.004692 | -0.05121 | 0.98172  |
| ADGB ENSG00000118492 protein_coding    | grey      | 0.113286 | 0.061245  | 0.151561 | -0.02668 |
| RPE65 ENSG00000116745 protein_coding   | grey      | -0.17768 | -0.09973  | -0.30298 | -0.05371 |
| UGT2B17 ENSG00000197888 protein_coding | grey      | 0.201595 | 0.100638  | 0.269552 | -0.0317  |
| SLC7A14 ENSG00000013293 protein_coding | grey      | -0.04475 | -0.013951 | -0.09424 | -0.01842 |
| TPX2 ENSG00000088325 protein_coding    | blue      | 0.977578 | 0.203211  | 0.945894 | -0.0413  |
| ATP1B4 ENSG00000101892 protein_coding  | turquoise | -0.04409 | 0.006045  | -0.05565 | 0.924055 |
| CRYBA4 ENSG00000196431 protein_coding  | grey      | -0.03729 | 0.015893  | -0.04086 | 0.053883 |
| CDC25C ENSG00000158402 protein_coding  | grey      | 0.8884   | 0.14687   | 0.882626 | -0.04553 |
| DNAH8 ENSG00000124721 protein_coding   | grey      | 0.119943 | 0.014765  | 0.156316 | -0.0232  |
| PLEKHD1 ENSG00000175985 protein_coding | grey      | 0.271735 | 0.055787  | 0.391603 | -0.03313 |
| ZBBX ENSG00000169064 protein_coding    | grey      | 0.139037 | 0.069963  | 0.22803  | -0.0336  |
| SMR3B ENSG00000171201 protein_coding   | grey      | -0.01238 | -0.023858 | -0.03018 | -0.00701 |
| SLC1A6 ENSG00000105143 protein_coding  | grey      | -0.12813 | -0.047182 | -0.19258 | -0.03415 |
| RAD54L ENSG00000085999 protein_coding  | grey      | 0.935096 | 0.170306  | 0.911579 | -0.04282 |
| GTSE1 ENSG00000075218 protein_coding   | grey      | 0.899273 | 0.165303  | 0.879132 | -0.05266 |
| IAPP ENSG00000121351 protein_coding    | grey      | 0.033002 | 0.003837  | 0.067857 | -0.0211  |
| C6orf10 ENSG00000204296 protein_coding | grey      | 0.166274 | 0.062127  | 0.195446 | -0.01271 |
| MT4 ENSG00000102891 protein_coding     | grey      | -0.0182  | 0.006024  | -0.00392 | -0.00179 |

|                                         |           |          |           |          |          |
|-----------------------------------------|-----------|----------|-----------|----------|----------|
| PDIA2 ENSG00000185615 protein_coding    | grey      | 0.090125 | 0.031526  | 0.183816 | 0.00121  |
| CENPA ENSG00000115163 protein_coding    | grey      | 0.9227   | 0.238402  | 0.936682 | -0.04129 |
| BRS3 ENSG00000102239 protein_coding     | grey      | 0.37952  | 0.254822  | 0.458989 | 0.003061 |
| TUBA4B ENSG00000243910 protein_coding   | grey      | 0.060203 | 0.03414   | 0.109826 | -0.02777 |
| MELK ENSG00000165304 protein_coding     | grey      | 0.941839 | 0.185121  | 0.928574 | -0.05819 |
| NUF2 ENSG00000143228 protein_coding     | grey      | 0.921289 | 0.167968  | 0.916058 | -0.04817 |
| ORC6 ENSG00000091651 protein_coding     | grey      | 0.890594 | 0.165333  | 0.892514 | -0.01843 |
| MAGEA6 ENSG00000197172 protein_coding   | grey      | 0.30395  | 0.086053  | 0.299409 | -0.01457 |
| C16orf92 ENSG00000167194 protein_coding | grey      | 0.219099 | 0.008705  | 0.291118 | -0.01639 |
| ANLN ENSG00000011426 protein_coding     | grey      | 0.846243 | 0.195099  | 0.824143 | -0.04134 |
| GPX5 ENSG00000224586 protein_coding     | grey      | -0.01539 | 0.001584  | -0.05283 | 0.050304 |
| CCDC169 ENSG00000242715 protein_coding  | grey      | -0.02775 | -0.058883 | -0.07209 | 0.020796 |
| FCRL2 ENSG00000132704 protein_coding    | grey      | 0.15349  | 0.127723  | 0.143955 | -0.01703 |
| TM4SF20 ENSG00000168955 protein_coding  | grey      | 0.07718  | -0.000259 | 0.149507 | -0.01278 |
| CST4 ENSG00000101441 protein_coding     | grey      | 0.010049 | 0.055802  | 0.045829 | -0.01622 |
| DHRS7C ENSG00000184544 protein_coding   | turquoise | -0.05142 | -0.006688 | -0.05396 | 0.988488 |
| CFC1B ENSG00000152093 protein_coding    | grey      | -0.02428 | -0.021585 | -0.02401 | -0.01139 |
| SCRT2 ENSG00000215397 protein_coding    | grey      | 0.011094 | -6.36E-05 | 0.062476 | -0.00335 |
| FAM3D ENSG00000198643 protein_coding    | grey      | -0.07355 | 0.025434  | -0.08679 | -0.01435 |
| SHCBP1 ENSG00000171241 protein_coding   | grey      | 0.894021 | 0.219479  | 0.862249 | -0.01818 |
| TUNAR ENSG00000250366 protein_coding    | grey      | 0.517255 | 0.038918  | 0.455629 | -0.02359 |
| PNMA5 ENSG00000198883 protein_coding    | grey      | 0.019029 | -0.010944 | 0.04405  | -0.00836 |

|                                              |           |          |           |          |          |
|----------------------------------------------|-----------|----------|-----------|----------|----------|
| ASPM ENSG00000066279 protein_coding          | blue      | 0.971849 | 0.208505  | 0.89995  | -0.03785 |
| NKX6-1 ENSG00000163623 protein_coding        | grey      | 0.159841 | 0.005951  | 0.241697 | -0.04104 |
| TRPC5OS ENSG00000204025 protein_coding       | grey      | 0.29757  | 0.093718  | 0.343124 | -0.06101 |
| PHYHD1 ENSG00000175287 protein_coding        | grey      | -0.23371 | -0.121393 | -0.30077 | 0.078901 |
| LRTM1 ENSG00000144771 protein_coding         | turquoise | -0.0597  | -0.009214 | -0.06979 | 0.901007 |
| KLK14 ENSG00000129437 protein_coding         | grey      | 0.124204 | 0.002032  | 0.15129  | -0.03054 |
| ZNF648 ENSG00000179930 protein_coding        | grey      | 0.023088 | -0.010453 | -0.02359 | 0.051982 |
| LY6G6F-LY6G6D ENSG00000250641 protein_coding | grey      | -0.04523 | 0.051538  | -0.04857 | -0.00379 |
| KCNG4 ENSG00000168418 protein_coding         | grey      | -0.10726 | -0.066779 | -0.16311 | 0.000665 |
| RDM1 ENSG00000278023 protein_coding          | grey      | 0.760011 | 0.12009   | 0.779553 | -0.03804 |
| AP002373.1 ENSG00000255663 protein_coding    | grey      | 0.173329 | 0.090362  | 0.268834 | -0.04479 |
| DHRS2 ENSG00000100867 protein_coding         | grey      | 0.042282 | 0.047303  | 0.073245 | -0.00775 |
| SLC17A4 ENSG00000146039 protein_coding       | grey      | 0.112228 | -0.015027 | 0.174076 | -0.03174 |
| MT1B ENSG00000169688 protein_coding          | grey      | -0.13623 | -0.074628 | -0.18367 | 0.026196 |
| OLFM4 ENSG00000102837 protein_coding         | grey      | -0.03756 | -0.043621 | -0.09372 | -0.01859 |
| HOXD1 ENSG00000128645 protein_coding         | grey      | 0.310006 | 0.040793  | 0.352186 | -0.02553 |
| HJV ENSG00000168509 protein_coding           | turquoise | -0.04709 | -0.005024 | -0.0485  | 0.934069 |
| MUC6 ENSG00000184956 protein_coding          | grey      | 0.114141 | 0.056024  | 0.152238 | -0.02274 |
| MUC21 ENSG00000204544 protein_coding         | grey      | -0.0826  | -0.028155 | -0.11922 | -0.02218 |
| PEBP4 ENSG00000134020 protein_coding         | grey      | -0.23883 | -0.118482 | -0.30079 | 0.007713 |
| RLN1 ENSG00000107018 protein_coding          | grey      | -0.09799 | -0.03596  | -0.11209 | -0.03073 |
| CEP55 ENSG00000138180 protein_coding         | grey      | 0.898462 | 0.179698  | 0.86967  | -0.03958 |

|                                          |           |          |           |          |          |
|------------------------------------------|-----------|----------|-----------|----------|----------|
| SLC18A3 ENSG00000187714 protein_coding   | grey      | 0.113132 | 0.01025   | 0.193473 | -0.03098 |
| HIST1H2AJ ENSG00000276368 protein_coding | grey      | 0.334259 | 0.090274  | 0.390295 | -0.03536 |
| FGB ENSG00000171564 protein_coding       | grey      | -0.00945 | -0.019269 | 0.009013 | -0.01368 |
| MUC1 ENSG00000185499 protein_coding      | grey      | 0.125197 | 0.071202  | 0.177486 | -0.02559 |
| TCTB ENSG00000119913 protein_coding      | grey      | 0.024014 | -0.024185 | 0.025764 | 0.018497 |
| FNDC1 ENSG00000164694 protein_coding     | brown     | 0.255026 | 0.952797  | 0.267988 | 0.015937 |
| ITLN2 ENSG00000158764 protein_coding     | grey      | -0.02064 | 0.009224  | -0.0338  | 0.008105 |
| CT45A10 ENSG00000269586 protein_coding   | grey      | 0.017205 | -0.010237 | 0.073774 | -0.01118 |
| ASIC5 ENSG00000256394 protein_coding     | grey      | 0.027581 | 0.058756  | 0.061125 | -0.00877 |
| HOXB6 ENSG00000108511 protein_coding     | grey      | 0.141393 | 0.091146  | 0.17651  | 0.018939 |
| C5orf46 ENSG00000178776 protein_coding   | grey      | 0.051822 | 0.192751  | 0.078533 | -0.02808 |
| IP6K3 ENSG00000161896 protein_coding     | grey      | -0.18741 | -0.065703 | -0.27394 | 0.647938 |
| ANPEP ENSG00000166825 protein_coding     | grey      | -0.14138 | -0.083093 | -0.20736 | 0.057442 |
| LRRTM3 ENSG00000198739 protein_coding    | grey      | 0.36167  | -0.014931 | 0.320821 | -0.01049 |
| XIRP1 ENSG00000168334 protein_coding     | turquoise | -0.04162 | 0.012655  | -0.04353 | 0.968984 |
| MAB21L2 ENSG00000181541 protein_coding   | grey      | 0.019247 | 0.034318  | 0.064919 | -0.0093  |
| CBX2 ENSG00000173894 protein_coding      | grey      | 0.467163 | 0.174715  | 0.548219 | -0.02465 |
| LIPF ENSG00000182333 protein_coding      | grey      | 0.075306 | 0.016555  | 0.126332 | -0.0075  |
| PAEP ENSG00000122133 protein_coding      | grey      | 0.037025 | 0.047819  | 0.02507  | -0.01869 |
| TEX19 ENSG00000182459 protein_coding     | grey      | 0.519131 | 0.108942  | 0.557572 | -0.0108  |
| DCAF4L2 ENSG00000176566 protein_coding   | grey      | 0.107683 | 0.02783   | 0.124235 | -0.01431 |
| DMBX1 ENSG00000197587 protein_coding     | grey      | 0.468513 | 0.208027  | 0.543045 | -0.05383 |



|                                         |           |          |           |          |          |
|-----------------------------------------|-----------|----------|-----------|----------|----------|
| IFNL3 ENSG00000197110 protein_coding    | grey      | 0.229892 | 0.014863  | 0.289172 | -0.02658 |
| NPR3 ENSG00000113389 protein_coding     | grey      | -0.03386 | -0.006839 | -0.08249 | 0.030137 |
| VWA5B1 ENSG00000158816 protein_coding   | grey      | 0.032444 | 0.00651   | 0.051992 | -0.01692 |
| REG1A ENSG00000115386 protein_coding    | grey      | -0.03626 | -0.008455 | -0.0191  | -0.00815 |
| TMEM213 ENSG00000214128 protein_coding  | grey      | -0.09625 | -0.048176 | -0.15828 | -0.02227 |
| UGT2A3 ENSG00000135220 protein_coding   | grey      | 0.125863 | 0.039767  | 0.191906 | -0.0075  |
| ASB10 ENSG00000146926 protein_coding    | turquoise | -0.04778 | -0.004591 | -0.05369 | 0.993419 |
| CARTPT ENSG00000164326 protein_coding   | grey      | -0.08787 | -0.056803 | -0.11827 | -0.02642 |
| CTAG2 ENSG00000126890 protein_coding    | grey      | -0.03312 | -0.010752 | -0.03316 | -0.01293 |
| CYP4F2 ENSG00000186115 protein_coding   | grey      | -0.0022  | -0.030728 | 0.005791 | -0.01415 |
| SLC13A1 ENSG00000081800 protein_coding  | grey      | 0.068633 | 0.016059  | 0.098595 | 0.003967 |
| AVPR1B ENSG00000198049 protein_coding   | grey      | 0.055075 | 0.031301  | 0.134055 | -0.02512 |
| PKMYT1 ENSG00000127564 protein_coding   | grey      | 0.847265 | 0.109311  | 0.890955 | -0.05759 |
| HIST1H4A ENSG00000278637 protein_coding | grey      | 0.166865 | 0.08194   | 0.2171   | -0.01438 |
| PCDHGA5 ENSG00000253485 protein_coding  | grey      | 0.248916 | 0.104124  | 0.30075  | -0.02536 |
| CKAP2L ENSG00000169607 protein_coding   | blue      | 0.975909 | 0.191879  | 0.912704 | -0.04393 |
| NCAPH ENSG00000121152 protein_coding    | grey      | 0.832457 | 0.181358  | 0.804378 | -0.01365 |
| MAGEA8 ENSG00000156009 protein_coding   | grey      | -0.02003 | -0.001635 | 0.00206  | 0.003044 |
| RRM2 ENSG00000171848 protein_coding     | grey      | 0.907141 | 0.235137  | 0.891903 | -0.04912 |
| BMP6 ENSG00000153162 protein_coding     | grey      | 0.552007 | 0.184363  | 0.60896  | -0.00329 |
| APOH ENSG00000091583 protein_coding     | grey      | 0.010418 | -0.004739 | 0.090699 | -0.02809 |
| SUCNR1 ENSG00000198829 protein_coding   | grey      | 0.242416 | 0.107411  | 0.264211 | -0.009   |

|                                          |           |          |           |          |          |
|------------------------------------------|-----------|----------|-----------|----------|----------|
| HIST1H3B ENSG00000274267 protein_coding  | grey      | 0.420343 | 0.152025  | 0.471298 | -0.02979 |
| CDC20 ENSG00000117399 protein_coding     | grey      | 0.922412 | 0.160581  | 0.930861 | -0.05462 |
| AQP2 ENSG00000167580 protein_coding      | grey      | 0.017543 | 0.009114  | -0.00303 | -0.01154 |
| COL11A1 ENSG00000060718 protein_coding   | brown     | 0.122211 | 0.971073  | 0.150882 | -0.0018  |
| CLRN3 ENSG00000180745 protein_coding     | grey      | 0.282411 | 0.03142   | 0.321156 | -0.00864 |
| TYRP1 ENSG00000107165 protein_coding     | grey      | 0.0794   | 0.096144  | 0.094923 | 0.07727  |
| GRP ENSG00000134443 protein_coding       | grey      | -0.05204 | 0.228773  | -0.06143 | -0.02533 |
| AKR1C3 ENSG00000196139 protein_coding    | grey      | 0.250094 | 0.087398  | 0.323391 | 0.022589 |
| PAH ENSG00000171759 protein_coding       | grey      | -0.10996 | -0.045367 | -0.14755 | 0.137559 |
| EXO1 ENSG00000174371 protein_coding      | grey      | 0.921691 | 0.217105  | 0.914987 | -0.04228 |
| CCDC144NL ENSG00000205212 protein_coding | grey      | 0.082748 | 0.036299  | 0.102641 | -0.01693 |
| CHAT ENSG00000070748 protein_coding      | grey      | 0.051318 | -0.003903 | 0.090255 | -0.01423 |
| PTPRR ENSG00000153233 protein_coding     | grey      | 0.057034 | 0.021078  | 0.094641 | -0.01373 |
| FBXO40 ENSG00000163833 protein_coding    | turquoise | -0.03336 | 0.007121  | -0.04728 | 0.964601 |
| ANKRD30A ENSG00000148513 protein_coding  | grey      | 0.035843 | 0.140651  | 0.065643 | -0.02079 |
| OR1Q1 ENSG00000165202 protein_coding     | grey      | 0.195064 | 0.095292  | 0.242564 | -0.00723 |
| KCTD8 ENSG00000183783 protein_coding     | grey      | -0.00287 | -0.022726 | -0.03846 | -0.03206 |
| DDX53 ENSG00000184735 protein_coding     | grey      | 0.072563 | 0.025007  | 0.133603 | -0.00823 |
| CSAG2 ENSG00000268902 protein_coding     | grey      | 0.044247 | 0.0083    | 0.088857 | -0.0239  |
| C9orf135 ENSG00000204711 protein_coding  | grey      | 0.107775 | 0.054969  | 0.147711 | 0.007744 |
| OMP ENSG00000254550 protein_coding       | grey      | 0.325076 | 0.01836   | 0.391539 | -0.04466 |
| SI ENSG00000090402 protein_coding        | grey      | 0.1474   | 0.036765  | 0.199495 | -0.02804 |

|                                        |       |          |           |          |          |
|----------------------------------------|-------|----------|-----------|----------|----------|
| KIF20A ENSG00000112984 protein_coding  | grey  | 0.948616 | 0.191278  | 0.922511 | -0.04745 |
| PRDM13 ENSG00000112238 protein_coding  | grey  | -0.03441 | -0.010887 | -0.03775 | -0.02796 |
| EFNA3 ENSG00000143590 protein_coding   | grey  | 0.150273 | 0.078731  | 0.268819 | -0.03828 |
| HTR2A ENSG00000102468 protein_coding   | grey  | 0.112247 | 0.170928  | 0.16355  | 0.044631 |
| PSCA ENSG00000167653 protein_coding    | grey  | 0.059055 | 0.171377  | 0.087069 | -0.01937 |
| CTHRC1 ENSG00000164932 protein_coding  | brown | 0.186752 | 0.966083  | 0.233438 | -0.01545 |
| TLX2 ENSG00000115297 protein_coding    | grey  | 0.184234 | 0.055686  | 0.221014 | -0.03788 |
| PPFIA2 ENSG00000139220 protein_coding  | grey  | 0.124257 | 0.081146  | 0.181984 | -0.04767 |
| INSM2 ENSG00000168348 protein_coding   | grey  | 0.119918 | 0.064807  | 0.174381 | -0.00666 |
| KIF4A ENSG00000090889 protein_coding   | blue  | 0.965518 | 0.179901  | 0.943374 | -0.04545 |
| LHFPL5 ENSG00000197753 protein_coding  | grey  | 0.103252 | 0.04664   | 0.178472 | 0.013466 |
| DIRAS2 ENSG00000165023 protein_coding  | grey  | 0.227488 | 0.033277  | 0.287163 | -0.0462  |
| ACY3 ENSG00000132744 protein_coding    | grey  | 0.00191  | -0.011454 | 0.041902 | -0.011   |
| LCN2 ENSG00000148346 protein_coding    | grey  | -0.08302 | -0.046866 | -0.13333 | 0.034796 |
| FAM135B ENSG00000147724 protein_coding | grey  | 0.368854 | -0.005487 | 0.350268 | -0.0184  |
| FGA ENSG00000171560 protein_coding     | grey  | -0.0628  | -0.025686 | -0.0347  | -0.02424 |
| CCDC166 ENSG00000255181 protein_coding | grey  | 0.371234 | 0.016389  | 0.401939 | -0.06392 |
| IQGAP3 ENSG00000183856 protein_coding  | grey  | 0.91237  | 0.16588   | 0.909725 | -0.03855 |
| PLK1 ENSG00000166851 protein_coding    | grey  | 0.953754 | 0.167215  | 0.940635 | -0.03872 |
| FOXG1 ENSG00000176165 protein_coding   | grey  | 0.055339 | 0.012625  | 0.073039 | -0.01444 |
| CA14 ENSG00000118298 protein_coding    | grey  | -0.21752 | -0.105046 | -0.33564 | -0.02759 |
| SLC5A8 ENSG00000256870 protein_coding  | grey  | -0.1358  | -0.072435 | -0.22584 | -0.00642 |

|                                         |           |          |           |          |          |
|-----------------------------------------|-----------|----------|-----------|----------|----------|
| CLPSL1 ENSG00000204140 protein_coding   | grey      | 0.109973 | 0.01392   | 0.173208 | 0.054152 |
| ABCC11 ENSG00000121270 protein_coding   | grey      | 0.055681 | 0.00446   | 0.090409 | -0.02034 |
| SPAG11A ENSG00000178287 protein_coding  | grey      | 0.01862  | -0.017602 | 0.002366 | -0.01834 |
| SGK2 ENSG00000101049 protein_coding     | grey      | 0.231081 | 0.007359  | 0.302885 | -0.02291 |
| MYL1 ENSG00000168530 protein_coding     | turquoise | -0.04979 | -0.002645 | -0.05229 | 0.986103 |
| DYTN ENSG00000232125 protein_coding     | grey      | 0.166142 | 0.098615  | 0.249538 | -0.01748 |
| ASIC2 ENSG00000108684 protein_coding    | grey      | 0.190867 | 0.048219  | 0.261062 | -0.03924 |
| HIST1H3C ENSG00000278272 protein_coding | grey      | 0.179284 | 0.024981  | 0.200933 | -0.02547 |
| SSTR1 ENSG00000139874 protein_coding    | grey      | 0.526849 | 0.076205  | 0.580923 | -0.03893 |
| ANO3 ENSG00000134343 protein_coding     | grey      | 0.028071 | 0.013725  | 0.047044 | -0.01241 |
| SCRT1 ENSG00000261678 protein_coding    | grey      | 0.015591 | -0.00341  | 0.075854 | 0.001402 |
| DUPD1 ENSG00000188716 protein_coding    | turquoise | -0.0364  | -0.000907 | -0.04165 | 0.988356 |
| SLC7A4 ENSG00000099960 protein_coding   | grey      | -0.18    | -0.105526 | -0.25152 | -0.03251 |
| MCM10 ENSG00000065328 protein_coding    | grey      | 0.925688 | 0.171993  | 0.888073 | -0.04604 |
| ASZ1 ENSG00000154438 protein_coding     | grey      | 0.099365 | 0.000779  | 0.135885 | -0.01602 |
| HAND1 ENSG00000113196 protein_coding    | grey      | 0.109512 | 0.066464  | 0.146552 | -0.00873 |
| CPN1 ENSG00000120054 protein_coding     | grey      | -0.01706 | -0.0213   | 0.03401  | -0.01089 |
| HIST1H3F ENSG00000277775 protein_coding | grey      | 0.259859 | 0.15158   | 0.277721 | -0.02472 |
| PPP1R3A ENSG00000154415 protein_coding  | turquoise | -0.05205 | 0.004932  | -0.06239 | 0.890376 |
| CCK ENSG00000187094 protein_coding      | grey      | -0.17102 | -0.09138  | -0.24273 | -0.02686 |
| HRG ENSG00000113905 protein_coding      | grey      | -0.05436 | -0.018216 | -0.02385 | -0.02159 |
| NUSAP1 ENSG00000137804 protein_coding   | blue      | 0.965284 | 0.18525   | 0.931187 | -0.05283 |

|                                          |           |          |           |          |          |
|------------------------------------------|-----------|----------|-----------|----------|----------|
| LY6G6D ENSG00000244355 protein_coding    | grey      | -0.05839 | 0.04996   | -0.06784 | -0.00766 |
| SOHLH2 ENSG00000120669 protein_coding    | grey      | -0.07174 | -0.04376  | -0.10011 | 0.057149 |
| EFNA2 ENSG00000099617 protein_coding     | grey      | 0.297705 | 0.047143  | 0.397517 | -0.03544 |
| SIM1 ENSG00000112246 protein_coding      | grey      | 0.108469 | 0.064873  | 0.137229 | 0.011826 |
| PROK1 ENSG00000143125 protein_coding     | grey      | -0.14123 | -0.046676 | -0.21939 | -0.00304 |
| CALML5 ENSG00000178372 protein_coding    | grey      | 0.050493 | 0.094992  | 0.080192 | -0.00787 |
| FOXI1 ENSG00000168269 protein_coding     | grey      | -0.11643 | -0.053445 | -0.16217 | -0.02722 |
| APOA2 ENSG00000158874 protein_coding     | grey      | 0.044342 | 0.030085  | 0.049626 | 0.045525 |
| CER1 ENSG00000147869 protein_coding      | grey      | 0.370478 | 0.076035  | 0.349558 | -0.02113 |
| C3orf30 ENSG00000163424 protein_coding   | grey      | 0.094023 | 0.021823  | 0.110369 | -0.01961 |
| MAB21L1 ENSG00000180660 protein_coding   | grey      | -0.00842 | -0.006316 | -0.05531 | 0.009831 |
| INSYN2B ENSG00000204767 protein_coding   | grey      | -0.04745 | 0.003937  | -0.14273 | -0.01779 |
| CELSR3 ENSG00000008300 protein_coding    | grey      | 0.316077 | 0.137233  | 0.415442 | -0.0311  |
| CDC42EP5 ENSG00000167617 protein_coding  | grey      | -0.2697  | -0.110955 | -0.33555 | 0.010271 |
| TRDN ENSG00000186439 protein_coding      | turquoise | -0.04986 | -0.00168  | -0.05489 | 0.992665 |
| SGO1 ENSG00000129810 protein_coding      | blue      | 0.971808 | 0.206447  | 0.923022 | -0.06089 |
| UTS2B ENSG00000188958 protein_coding     | grey      | 0.261438 | 0.025834  | 0.329704 | -0.01633 |
| MAGEA12 ENSG00000213401 protein_coding   | grey      | 0.20498  | 0.05813   | 0.217188 | -0.01457 |
| BUB1 ENSG00000169679 protein_coding      | blue      | 0.971597 | 0.243065  | 0.927153 | -0.04633 |
| OTOR ENSG00000125879 protein_coding      | grey      | 0.041583 | 0.14905   | 0.106026 | -0.01491 |
| TMPRSS11A ENSG00000187054 protein_coding | grey      | -0.0472  | -0.051439 | -0.09334 | -0.03736 |
| RFX6 ENSG00000185002 protein_coding      | grey      | 0.127606 | 0.007489  | 0.176015 | -0.02779 |

|                                         |           |          |           |          |          |
|-----------------------------------------|-----------|----------|-----------|----------|----------|
| NETO1 ENSG00000166342 protein_coding    | grey      | 0.063269 | 0.009027  | 0.088998 | -0.0122  |
| KCNQ2 ENSG00000075043 protein_coding    | grey      | 0.021778 | -0.007025 | 0.088211 | -0.01839 |
| PADI3 ENSG00000142619 protein_coding    | grey      | -0.07755 | -0.031166 | -0.10667 | -0.0219  |
| B3GNT6 ENSG00000198488 protein_coding   | grey      | 0.192394 | 0.062837  | 0.236679 | -0.04329 |
| FMOD ENSG00000122176 protein_coding     | grey      | -0.11596 | -0.034102 | -0.20183 | 0.002663 |
| RAB3C ENSG00000152932 protein_coding    | grey      | 0.133008 | 0.226846  | 0.167861 | -0.00149 |
| PON1 ENSG00000005421 protein_coding     | grey      | -0.01154 | -0.0417   | 0.019435 | -0.00863 |
| CKM ENSG00000104879 protein_coding      | turquoise | -0.05396 | -0.004611 | -0.06049 | 0.995363 |
| FAM72C ENSG00000263513 protein_coding   | grey      | 0.732323 | 0.101004  | 0.721337 | 0.002783 |
| IGSF1 ENSG00000147255 protein_coding    | grey      | -0.17378 | -0.064292 | -0.27873 | 0.303583 |
| TRIM49B ENSG00000182053 protein_coding  | grey      | 0.064277 | 0.012001  | 0.092152 | 0.000569 |
| ZNF280A ENSG00000169548 protein_coding  | grey      | 0.11741  | 0.089801  | 0.175658 | -0.01799 |
| A1CF ENSG00000148584 protein_coding     | grey      | -0.00497 | -0.017377 | 0.014565 | -0.02926 |
| MYH7 ENSG00000092054 protein_coding     | turquoise | -0.05017 | -0.004509 | -0.0562  | 0.997003 |
| UGT2B15 ENSG00000196620 protein_coding  | grey      | 0.21821  | 0.224596  | 0.283772 | -0.03699 |
| HTR1F ENSG00000179097 protein_coding    | grey      | 0.199939 | 0.391827  | 0.230958 | -0.0309  |
| ARHGDIG ENSG00000242173 protein_coding  | grey      | 0.236218 | 0.03631   | 0.349217 | 0.030347 |
| CXCL5 ENSG00000163735 protein_coding    | grey      | 0.001969 | -0.011099 | -0.05236 | 0.061718 |
| KLHL1 ENSG00000150361 protein_coding    | grey      | 0.138205 | -0.002723 | 0.139809 | -0.0192  |
| CHRNA2 ENSG00000120903 protein_coding   | grey      | -0.11981 | -0.119754 | -0.20145 | 0.012993 |
| EDN3 ENSG00000124205 protein_coding     | grey      | -0.06556 | 0.0385    | -0.09729 | 0.007855 |
| ANKRD30B ENSG00000180777 protein_coding | grey      | 0.107205 | 0.065949  | 0.12069  | -0.02388 |

|                                        |           |          |           |          |          |
|----------------------------------------|-----------|----------|-----------|----------|----------|
| PLA2G2E ENSG00000188784 protein_coding | grey      | -0.01755 | -0.013789 | 0.04     | -0.03456 |
| CHI3L2 ENSG00000064886 protein_coding  | grey      | -0.03317 | -0.007843 | -0.08577 | 0.034558 |
| SMCO1 ENSG00000214097 protein_coding   | turquoise | -0.051   | -0.005388 | -0.05354 | 0.985038 |
| FDCSP ENSG00000181617 protein_coding   | grey      | 0.137198 | 0.164692  | 0.142938 | -0.02122 |
| KLHL40 ENSG00000157119 protein_coding  | turquoise | -0.04578 | 0.001243  | -0.05365 | 0.996874 |
| SLC39A2 ENSG00000165794 protein_coding | grey      | -0.0141  | -0.026438 | -0.04378 | -0.02523 |
| CDH18 ENSG00000145526 protein_coding   | grey      | -0.10668 | -0.059146 | -0.16379 | 0.006527 |
| UNC45B ENSG00000141161 protein_coding  | turquoise | -0.04179 | 0.005775  | -0.05211 | 0.98597  |
| KRT76 ENSG00000185069 protein_coding   | grey      | -0.07026 | -0.026752 | -0.07193 | 0.036877 |
| BIRC5 ENSG00000089685 protein_coding   | grey      | 0.899967 | 0.157362  | 0.903207 | -0.05135 |
| DLGAP5 ENSG00000126787 protein_coding  | blue      | 0.980176 | 0.196004  | 0.932488 | -0.04627 |
| CDC20B ENSG00000164287 protein_coding  | grey      | 0.013553 | -0.008549 | 0.038055 | -0.00896 |
| KHDC1L ENSG00000256980 protein_coding  | grey      | 0.084982 | 0.061796  | 0.108796 | -0.00762 |
| ORM1 ENSG00000229314 protein_coding    | grey      | 0.011727 | -0.020802 | 0.006656 | -0.01444 |
| LTF ENSG00000012223 protein_coding     | grey      | -0.01338 | -0.012683 | -0.07202 | -0.00296 |
| FAM72B ENSG00000188610 protein_coding  | grey      | 0.86937  | 0.167508  | 0.852518 | -0.02956 |
| LHX9 ENSG00000143355 protein_coding    | grey      | 0.0202   | 0.021571  | 0.065115 | -0.01939 |
| LRTM2 ENSG00000166159 protein_coding   | grey      | 0.025626 | 0.037052  | 0.127148 | -0.02612 |
| NEIL3 ENSG00000109674 protein_coding   | grey      | 0.932933 | 0.144973  | 0.899398 | -0.05732 |
| ZPLD1 ENSG00000170044 protein_coding   | grey      | 0.335527 | 0.209674  | 0.419761 | -0.01763 |
| OR1J1 ENSG00000136834 protein_coding   | grey      | 0.293381 | 0.142175  | 0.350451 | 0.013162 |
| COL6A5 ENSG00000172752 protein_coding  | grey      | -0.07685 | -0.015731 | -0.11194 | -0.01073 |

|                                           |           |          |           |          |          |
|-------------------------------------------|-----------|----------|-----------|----------|----------|
| ZNF556 ENSG00000172000 protein_coding     | grey      | 0.312624 | 0.048207  | 0.362386 | 0.014497 |
| THBS2 ENSG00000186340 protein_coding      | brown     | 0.264724 | 0.954298  | 0.282292 | 0.014461 |
| SPRR2F ENSG00000244094 protein_coding     | grey      | 0.153776 | 0.157465  | 0.175368 | -0.03228 |
| CAMKV ENSG00000164076 protein_coding      | grey      | 0.094345 | 0.025426  | 0.132722 | 0.009257 |
| AKR1D1 ENSG00000122787 protein_coding     | grey      | 0.197722 | 0.075705  | 0.255107 | -0.01904 |
| ARSF ENSG00000062096 protein_coding       | grey      | -0.08514 | 0.137723  | -0.13573 | -0.03701 |
| C10orf71 ENSG00000177354 protein_coding   | turquoise | -0.037   | 0.003269  | -0.04743 | 0.993067 |
| SLC9A3 ENSG00000066230 protein_coding     | grey      | 0.104376 | 0.029087  | 0.114921 | -0.03628 |
| CLCA2 ENSG00000137975 protein_coding      | grey      | -0.06238 | -0.011185 | -0.10796 | -0.02299 |
| EOMES ENSG00000163508 protein_coding      | grey      | 0.180161 | 0.059181  | 0.205574 | -0.02532 |
| S100P ENSG00000163993 protein_coding      | grey      | 0.085094 | 0.023934  | 0.084922 | 0.035721 |
| ANKRD34B ENSG00000189127 protein_coding   | grey      | 0.249815 | 0.075505  | 0.343143 | -0.04837 |
| ATP6V0A4 ENSG00000105929 protein_coding   | grey      | -0.09356 | -0.044659 | -0.14868 | -0.02528 |
| CA1 ENSG00000133742 protein_coding        | grey      | 0.126813 | 0.250312  | 0.203538 | -0.00647 |
| NCAPG ENSG00000109805 protein_coding      | blue      | 0.94377  | 0.176833  | 0.87706  | -0.04766 |
| DQX1 ENSG00000144045 protein_coding       | grey      | 0.355501 | 0.018007  | 0.342886 | -0.02028 |
| IBSP ENSG00000029559 protein_coding       | grey      | 0.345592 | 0.505695  | 0.389246 | 0.012788 |
| AL049839.2 ENSG00000273259 protein_coding | grey      | -0.05466 | -0.019448 | -0.09762 | 0.057762 |
| LMOD2 ENSG00000170807 protein_coding      | turquoise | -0.04407 | -0.00071  | -0.0492  | 0.992093 |
| ATP12A ENSG00000075673 protein_coding     | grey      | 0.008746 | 0.018283  | 0.091976 | -0.01868 |
| HIST1H3I ENSG00000275379 protein_coding   | grey      | 0.013563 | -0.000123 | 0.043233 | -0.01148 |
| CST5 ENSG00000170367 protein_coding       | grey      | 0.021015 | 0.047707  | 0.062486 | -0.01529 |



|                                        |           |          |           |          |          |
|----------------------------------------|-----------|----------|-----------|----------|----------|
| TUBB3 ENSG00000258947 protein_coding   | grey      | 0.329749 | 0.19566   | 0.436921 | -0.051   |
| CPNE6 ENSG00000100884 protein_coding   | grey      | -0.17584 | -0.080271 | -0.2627  | -0.00012 |
| CCDC194 ENSG00000269720 protein_coding | grey      | 0.349677 | 0.046018  | 0.422258 | -0.01492 |
| MYOZ2 ENSG00000172399 protein_coding   | turquoise | -0.04707 | 0.000478  | -0.05478 | 0.992231 |
| E2F8 ENSG00000129173 protein_coding    | grey      | 0.821285 | 0.24732   | 0.802781 | 0.303977 |
| MTFR2 ENSG00000146410 protein_coding   | grey      | 0.893281 | 0.18905   | 0.897605 | -0.0395  |
| TROAP ENSG00000135451 protein_coding   | grey      | 0.891478 | 0.196221  | 0.919151 | -0.0442  |
| UGT1A1 ENSG00000241635 protein_coding  | grey      | 0.23564  | 0.045761  | 0.291395 | -0.01601 |
