# Supplementary material
Source: publisher site journal article supplement (https://static.cambridge.org/content/id/urn%3Acambridge.org%3Aid%3Aarticle%3AS001667230050072X/resource/name/S001667230050072Xsupp001.zip)
Supplement: Supplementary file 6 [file S001667230050072Xsupp001.zip]

Supplementary Data 6-1: 29 immune microenvironment signatures  
signature

aDCs: CD83 LAMP3 CCL1

APC\_co\_inhibition: C10orf54 CD274 LGALS9 PDCD1LG2 PVRL3

APC\_co\_stimulation: CD40 CD58 CD70 ICOSLG SLAMF1TNFSF14  
TNFSF15 TNFSF18 TNFSF4 TNFSF8 TNFSF9

B\_cells: BACH2 BANK1 BLK BTLA CD79A CD79B FCRL1 FCRL3 HVCN1  
RALGPS2

CCR: CCL16TPOTGFB2 CXCL2 CCL14 TGFBR3 IL11RA CCL11 IL4I1 IL33  
CXCL12 CXCL10 BMPER BMP8A CXCL11 IL21R IL17B TNFRSF9 ILF2  
CX3CR1 CCR8 TNFSF12 CSF3 TNFSF4 BMP3 CX3CL1 BMP5 CXCR2  
TNFRSF10D BMP2 CXCL14 CCL28 CXCL3 BMP6 CCL21 CXCL9 CCL23  
IL6 TNFRSF18 IL17RD IL17D IL27CCL7 IL1R1 CXCR4 CXCR2P1  
TGFB1I1IFNGR1 IL9R IL1RAPL1 IL11CSF1 IL20RA IL25TNFRSF4  
IL18ILF3CCL20 TNFRSF12A IL6ST CXCL13 IL12B TNFRSF8 IL6R  
BMPR2 IFNE IL1RAPL2 IL3RA BMP4 CCL24 TNFSF13B CCR4  
IL2RA IL32TNFRSF10C IL22RA1BMPR1A CXCR5 CXCR3 IFNA8  
IL17REL IFNB1 IFNAR1 TNFRSF1B CCL17 IFNL1 IL16IL1RL1 ILK CCL25  
ILDR2 CXCR1 IL36RN IL34TGFB1 IFNG IL19ILKAP BMP2K CCR10  
ILDR1 EPOCCR7 IL17C IL23A CCR5 IL7 EPOR CCL13 IL2RG  
IL31RA TNFAIP6 IFNL2 BMP1 IL12RB1TNFAIP8 IL4R TNFRSF6B  
TNFAIP8L1 TNFRSF10B IFNL3 CCL5 CXCL6 CXCL1 CCR3 TNFSF11  
CSF1R IL21IL1RAP IL12RB2CCL1 IL17RA CCR1 IL1RN TNFRSF11B  
TNFRSF14 IL13IL2RB BMP8B CCL2 IL24IL18RAPTGFB1 TNFSF10  
TNFRSF11A CXCL5 IL5RA TNFSF9 IL1RL2 TNFRSF13C IL36G IL15RA  
TNFRSF21 CXCL8 IL22RA2TNFAIP8L2 IL18R1 IFNLR1 CXCR6 CCL3L3  
TNFRSF1A IL17RE IFNGR2 IL17RC TNFAIP8L3 ILVBL TGFBRAP1 CCL4L1  
CSF2RA CCRN4LCCL26 TNFAIP1 CCRL2 IFNA10 TNFRSF17 IFNA13  
IL20IL18BP CCL3L1 TNFSF12-TNFSF13 IL5 IL23R IL26TNFTGFA CSF2  
IL1F10 CXCL17 TNFSF13 IFNA4 IL37IL12A IL7R IFNA1 IL1A IL4  
IL2 CCL22 CSF3R IL10IFNK TGFB2 IL1R2 IL1B IL17F IL27RA  
IL15TNFSF8 IL36B XCL1 CXCL16 TNFRSF19 IL3 CCL3 IFNA2  
BMPR1B IFNA21 TNFSF18 CCL8 IL17RB TNFRSF25 IL22IL10RB  
IFNAR2 CCL18 IFNA16 CSF2RB IL36A TNFAIP3 IL13RA2IL13RA1CCR9  
TNFRSF10A IFNA7 IFNW1 XCL2 TNFSF14 CCR2 BMP15 BMP10  
CCL15-CCL14 TGFBR1 IFNA5 BMP7 IFNA14 IL20RB IL10RA IFNA17  
CCR6 TGFB3 CCL15 CCL4 CCL27 TNFRSF13B TNFAIP2 IL31IL17A  
TNFSF15 CCL19 IFNA6 IL9

CD8+\_T\_cells: CD8A

Check-point: IDO1 LAG3 CTLA4 TNFRSF9 ICOS CD80 PDCD1LG2  
TIGIT CD70 TNFSF9 ICOSLG KIR3DL1 CD86 PDCD1 LAIR1  
TNFRSF8 TNFSF15 TNFRSF14 IDO2 CD276 CD40 TNFRSF4  
TNFSF14 HHLA2 CD244 CD274 HAVCR2 CD27 BTLA LGALS9  
TMIGD2CD28 CD48 TNFRSF25 CD40LGADORA2A VTCN1 CD160

CD44 TNFSF18 TNFRSF18 BTNL2 C10orf54 CD200R1 TNFSF4  
 CD200 NRP1  
 Cytolytic\_activity: PRF1 GZMA  
 DCs: CCL17CCL22 CD209 CCL13  
 HLA: HLA-E HLA-DPB2 HLA-C HLA-J HLA-DQB1 HLA-DQB2 HLA-DQA2  
 HLA-DQA1 HLA-A HLA-DMA HLA-DOB HLA-DRB1 HLA-H HLA-B  
 HLA-DRB5 HLA-DOA HLA-DPB1 HLA-DRA HLA-DRB6 HLA-L HLA-F  
 HLA-G HLA-DMB HLA-DPA1  
 iDCs: CD1ACD1E  
 Inflammation-promoting: CCL5 CD19 CD8B CXCL10 CXCL13 CXCL9 GNL1  
 GZMB IFNG IL12A IL12B IRF1 PRF1 STAT1 TBX21  
 Macrophages: C11orf45CD68 CLEC5A CYBB FUCA1 GPNMB HS3ST2 LGMN  
 MMP9 TM4SF19  
 Mast\_cells: CMA1 MS4A2 TPSAB1  
 MHC\_class\_I: B2M HLA-A TAP1  
 Neutrophils: EVI2B HSD17B11 KDM6B MEGF9 MNDA NLRP12 PADI4 SELL  
 TRANK1VNN3  
 NK\_cells: KLRC1 KLRF1  
 Parainflammation: CXCL10 PLAT CCND1 LGMN PLAUR AIM2 MMP7  
 ICAM1 MX2 CXCL9 ANXA1 TLR2 PLA2G2D ITGA2 MX1  
 HMOX1CD276 TIRAP IL33PTGES TNFRSF12A SCARB1CD14 BLNK  
 IFIT3 RETNLB IFIT2 ISG15 OAS2 REL OAS3 CD44 PPARG BST2  
 OAS1 NOX1 PLA2G2A IFIT1 IFITM3 IL1RN  
 pDCs: CLEC4C CXCR3 GZMB IL3RA IRF7 IRF8 LILRA4 PHEX PLD4  
 PTCRA  
 T\_cell\_co-inhibition: BTLA C10orf54 CD160 CD244 CD274 CTLA4  
 HAVCR2 LAG3 LAIR1 TIGIT  
 T\_cell\_co-stimulation: CD2 CD226 CD27 CD28 CD40LG ICOS SLAMF1  
 TNFRSF18 TNFRSF25 TNFRSF4 TNFRSF8 TNFRSF9 TNFSF14  
 T\_helper\_cells: CD4  
 Tfh: PDCD1CXCL13 CXCR5  
 Th1\_cells: IFNG TBX21 CTLA4 STAT4 CD38 IL12RB2LTA CSF2  
 Th2\_cells: PMCH LAIR2 SMAD2 CXCR6 GATA3 IL26  
 TIL: ITM2C CD38 THEMIS2 GLYR1 ICOS F5 TIGIT KLRD1 IRF4  
 PRKCQ FCRL5 SIRPG LPXN IL2RG CCL5 LCKTRAF3IP3 CD86  
 MAL LILRB1 DOK2 CD6PAG1 LAX1 PLEK PIK3CD SLAMF1XCL1  
 GPR171XCL2 TBX21 CD2CD53 KLHL6 SLAMF6CD40 SIT1  
 TNFRSF4 CD79A CD247 LCP2 CD3D CD27 SH2D1AFYB ARHGAP30  
 ACAP1 CST7 CD3G IL2RB CD3E FCRL3 CORO1A ITK TCL1A  
 CYBB CSF2RB IKZF1 NCF4 DOCK2 CCR2 PTPRC PLAC8 NCKAP1L  
 IL7R 6-Sep CD28 STAT4 CD8A LY9 CD48 HCST PTPRCAP  
 SASH3 ARHGAP25 LATTRAT1 IL10RA PAX5 CCR7 DOCK11PARVG  
 SPNS1 CD52 HCLS1 ARHGAP9 GIMAP6PRKCB MS4A1 GPR18  
 TBC1D10C GVINP1 P2RY8 EVI2B VAMP5 KLRK1 SELL MPEP1

MS4A6A ARHGAP15 MFNG GZMK SELPLG TARP GIMAP7FAM65B  
 INPP5D ITGA4 MZB1 GPSM3 STK10 CLEC2D IL16NLRC3 GIMAP5  
 GIMAP4IFFO1 CFHPVRIG CFHR1

Treg: IL12RB2 TMPRSS6 CTSC LAPTM4B TFRC RNF145 NETO2 ADAT2  
 CHST2 CTLA4 NFE2L3 LIMA1 IL1R2 ICOS HSDL2 HTATIP2  
 FKBP1A TIGIT CCR8 LTA SLC35F2 IL21R AHCYL1 SOCS2 ETV7  
 BCL2L1 RRAGB ACSL4 CHRNA6 BATF LAX1 ADPRH TNFRSF4  
 ANKRD10 CD274 CASP1 LY75 NPTN SSTR3 GRSF1 CSF2RB  
 TMEM184C NDFIP2 ZBTB38 ERI1 TRAF3 NAB1 HS3ST3B1 LAYN  
 JAK1 VDR LEPROT GCNT1 PTPRJ IKZF2 CSF1 ENTPD1 TNFRSF18  
 METTL7A KSR1 SSH1 CADM1 IL1R1 ACP5 CHST7 THADA CD177  
 NFAT5 ZNF282 MAGEH1

Type\_I\_IFN\_Reponse: DDX4 IFIT1 IFIT2 IFIT3 IRF7 ISG20 MX1  
 MX2 RSAD2 TNFSF10

Type\_II\_IFN\_Reponse: GPR146 SELP AHR

| Supplementary Data 6-2:stromal score, immune score, estimate score, tumor purtiy of TCGA samples |              |              |             |               |             |
|--------------------------------------------------------------------------------------------------|--------------|--------------|-------------|---------------|-------------|
|                                                                                                  | ID           | StromalScore | ImmuneScore | ESTIMATEScore | TumorPurity |
|                                                                                                  | TCGA-KK-A6E5 | -550.919     | -252.873    | -803.793      | 0.883741    |
|                                                                                                  | TCGA-EJ-A65E | -1180.92     | -694.705    | -1875.62      | 0.94615     |
|                                                                                                  | TCGA-EJ-7785 | -55.1382     | 197.5854    | 142.4472      | 0.810438    |
|                                                                                                  | TCGA-SU-A7E7 | -586.069     | 91.52555    | -494.543      | 0.861594    |
|                                                                                                  | TCGA-VN-A88Q | -1194.96     | -646.745    | -1841.7       | 0.944526    |
|                                                                                                  | TCGA-EJ-8472 | -727.43      | -794.506    | -1521.94      | 0.928076    |
|                                                                                                  | TCGA-HC-8262 | -1083.66     | -736.556    | -1820.22      | 0.943486    |
|                                                                                                  | TCGA-HC-7747 | -518.929     | 402.9644    | -115.964      | 0.832071    |
|                                                                                                  | TCGA-QU-A6IM | -839.45      | 558.0319    | -281.418      | 0.845296    |
|                                                                                                  | TCGA-HC-7819 | -1349.71     | -930.08     | -2279.79      | 0.96368     |
|                                                                                                  | TCGA-EJ-5510 | -513.076     | 69.56141    | -443.514      | 0.857768    |
|                                                                                                  | TCGA-HC-A76X | -1318.14     | -1159.26    | -2477.4       | 0.97102     |
|                                                                                                  | TCGA-J4-A67N | -867.235     | 185.5835    | -681.652      | 0.875209    |
|                                                                                                  | TCGA-EJ-A7NH | -647.578     | -536.732    | -1184.31      | 0.908488    |
|                                                                                                  | TCGA-G9-6365 | 5.6383       | -228.961    | -223.323      | 0.840708    |
|                                                                                                  | TCGA-XA-A8JR | -593.903     | -386.188    | -980.09       | 0.895554    |
|                                                                                                  | TCGA-KC-A4BL | -436.235     | 71.14078    | -365.094      | 0.851794    |
|                                                                                                  | TCGA-CH-5737 | -1201.39     | -726.694    | -1928.09      | 0.948615    |
|                                                                                                  | TCGA-XK-AAK1 | -1037.84     | -346.009    | -1383.85      | 0.920337    |
|                                                                                                  | TCGA-XK-AAIR | -482.949     | -1.34205    | -484.291      | 0.860829    |
|                                                                                                  | TCGA-HC-7210 | 155.8637     | 247.7469    | 403.6107      | 0.78739     |
|                                                                                                  | TCGA-G9-6361 | -191.049     | -624.053    | -815.102      | 0.884517    |
|                                                                                                  | TCGA-YL-A8HO | 430.1321     | 994.4227    | 1424.555      | 0.686526    |
|                                                                                                  | TCGA-CH-5765 | -1080.24     | -954.542    | -2034.78      | 0.953454    |

|              |          |          |          |          |
|--------------|----------|----------|----------|----------|
| TCGA-EJ-A65G | -1039.41 | -891.546 | -1930.96 | 0.948748 |
| TCGA-HC-7742 | -429.711 | -673.735 | -1103.45 | 0.903464 |
| TCGA-CH-5763 | -64.211  | -120.983 | -185.194 | 0.837665 |
| TCGA-J4-A6G3 | -375.692 | 716.244  | 340.5515 | 0.793062 |
| TCGA-HC-8216 | -481.47  | 165.0773 | -316.393 | 0.848027 |
| TCGA-2A-A8W1 | -1670.59 | -884.165 | -2554.76 | 0.973671 |
| TCGA-G9-6362 | -567.704 | -343.178 | -910.881 | 0.890988 |
| TCGA-EJ-7782 | -483.682 | -358.448 | -842.13  | 0.88636  |
| TCGA-CH-5743 | -688.072 | 794.6426 | 106.5705 | 0.813512 |
| TCGA-EJ-5501 | -877.725 | -482.554 | -1360.28 | 0.918979 |
| TCGA-EJ-A7NG | -433.525 | -324.051 | -757.576 | 0.880546 |
| TCGA-VP-A876 | -1328.38 | -967.589 | -2295.97 | 0.964311 |
| TCGA-J4-A83L | -503.126 | -602.716 | -1105.84 | 0.903614 |
| TCGA-VN-A943 | -1925.26 | -1339.23 | -3264.49 | 0.992098 |
| TCGA-YL-A8SH | -666.68  | -474.493 | -1141.17 | 0.905824 |
| TCGA-EJ-7315 | 210.2827 | 922.3812 | 1132.664 | 0.717041 |
| TCGA-EJ-5508 | -405.102 | 298.4548 | -106.648 | 0.831312 |
| TCGA-KK-A7AV | -282.044 | 1065.023 | 782.9797 | 0.751859 |
| TCGA-V1-A8MU | 1.836886 | 455.7875 | 457.6244 | 0.782478 |
| TCGA-QU-A6IL | -1059.14 | -225.058 | -1284.2  | 0.914518 |
| TCGA-J4-A67O | -112.713 | 161.6042 | 48.89076 | 0.818407 |
| TCGA-EJ-7781 | -529.027 | -56.4493 | -585.477 | 0.868293 |
| TCGA-G9-6348 | -124.904 | 66.18476 | -58.7193 | 0.827381 |
| TCGA-XK-AAJU | -884.257 | -149.079 | -1033.34 | 0.899004 |
| TCGA-J4-A83J | -887.83  | 139.9681 | -747.862 | 0.879869 |
| TCGA-WW-A8ZI | -936.194 | -405.62  | -1341.81 | 0.917907 |
| TCGA-EJ-5503 | -472.702 | 32.4511  | -440.25  | 0.857522 |
| TCGA-HC-7211 | -915.959 | -92.594  | -1008.55 | 0.897405 |
| TCGA-CH-5750 | -777.322 | 358.3619 | -418.96  | 0.85591  |
| TCGA-HI-7170 | 253.5063 | 346.1311 | 599.6374 | 0.769328 |
| TCGA-KK-A6E3 | -176.616 | 580.5962 | 403.9799 | 0.787357 |
| TCGA-CH-5746 | -1240.23 | -902.968 | -2143.19 | 0.958132 |
| TCGA-EJ-7123 | -817.021 | -687.724 | -1504.74 | 0.927133 |
| TCGA-J4-A67L | -471.71  | 499.0426 | 27.33273 | 0.820221 |
| TCGA-EJ-A7NJ | -1051.78 | -107.68  | -1159.46 | 0.906958 |
| TCGA-KC-A7F6 | -842.022 | -382.215 | -1224.24 | 0.910922 |
| TCGA-V1-A9ZR | 272.7534 | 707.4098 | 980.1633 | 0.732463 |
| TCGA-KK-A6DY | -808.604 | -17.5541 | -826.158 | 0.885272 |
| TCGA-4L-AA1F | 1771.63  | 1646.975 | 3418.604 | 0.447527 |
| TCGA-XK-AAJT | -100.447 | 15.52334 | -84.9236 | 0.829535 |
| TCGA-HC-8260 | -579.914 | -350.13  | -930.045 | 0.892261 |
| TCGA-V1-A8MK | -622.472 | -405.778 | -1028.25 | 0.898677 |
| TCGA-HI-7169 | -221.315 | -436.674 | -657.989 | 0.873523 |

|              |          |          |          |          |
|--------------|----------|----------|----------|----------|
| TCGA-KC-A4BN | -1475.86 | -742.934 | -2218.79 | 0.96125  |
| TCGA-V1-A8ML | -387.152 | -653.661 | -1040.81 | 0.899485 |
| TCGA-EJ-A7NK | -843.467 | -534.119 | -1377.59 | 0.919977 |
| TCGA-G9-6384 | -342.08  | -240.536 | -582.616 | 0.868084 |
| TCGA-J4-A83I | -525.209 | -199.495 | -724.704 | 0.878249 |
| TCGA-VP-A87C | 514.4221 | 2018.131 | 2532.553 | 0.55973  |
| TCGA-EJ-A65M | -566.609 | 102.4297 | -464.179 | 0.859323 |
| TCGA-EJ-7797 | -924.779 | -279.896 | -1204.67 | 0.909733 |
| TCGA-EJ-AB27 | -938.185 | 283.6279 | -654.557 | 0.873278 |
| TCGA-KK-A8I6 | -1001.77 | -455.576 | -1457.35 | 0.924504 |
| TCGA-2A-A8VV | -922.085 | -996.459 | -1918.54 | 0.948171 |
| TCGA-VN-A88I | 670.0433 | 333.7929 | 1003.836 | 0.730093 |
| TCGA-2A-A8VX | -1072.42 | -1325.51 | -2397.93 | 0.968166 |
| TCGA-EJ-A8FN | -417.349 | 131.6857 | -285.663 | 0.845628 |
| TCGA-G9-6379 | -304.06  | 1045.94  | 741.8798 | 0.755823 |
| TCGA-EJ-7788 | -111.931 | -291.294 | -403.225 | 0.854713 |
| TCGA-HC-7740 | -189.717 | 1.474221 | -188.243 | 0.837909 |
| TCGA-KC-A7F3 | -914.035 | -428.331 | -1342.37 | 0.917939 |
| TCGA-EJ-7792 | 397.2586 | 586.6029 | 983.8614 | 0.732093 |
| TCGA-EJ-7317 | -742.128 | -884.632 | -1626.76 | 0.933696 |
| TCGA-EJ-5498 | 152.096  | 180.6568 | 332.7528 | 0.793759 |
| TCGA-G9-6369 | -747.353 | -778.112 | -1525.46 | 0.928268 |
| TCGA-QU-A6IO | -886.222 | 257.8784 | -628.343 | 0.871397 |
| TCGA-EJ-7125 | -407.43  | -154.75  | -562.18  | 0.866591 |
| TCGA-J4-A6G1 | 104.5695 | 1996.209 | 2100.779 | 0.611092 |
| TCGA-KK-A6E4 | -1099.23 | -370.478 | -1469.71 | 0.925194 |
| TCGA-EJ-7314 | -1273.26 | -696.916 | -1970.18 | 0.950552 |
| TCGA-YL-A8SA | -1408.14 | -812.249 | -2220.39 | 0.961315 |
| TCGA-EJ-7330 | -317.347 | -430.128 | -747.475 | 0.879842 |
| TCGA-EJ-7325 | -867.187 | -491.675 | -1358.86 | 0.918897 |
| TCGA-EJ-7791 | 225.2806 | -82.7696 | 142.511  | 0.810433 |
| TCGA-VN-A88R | -334.065 | -328.302 | -662.367 | 0.873836 |
| TCGA-XK-AAJP | -682.404 | -268.546 | -950.951 | 0.893643 |
| TCGA-2A-A8VL | -1095.46 | -795.652 | -1891.11 | 0.946883 |
| TCGA-KK-A8IG | 173.8688 | -95.9687 | 77.90019 | 0.815952 |
| TCGA-QU-A6IN | -1388.39 | -814.06  | -2202.45 | 0.960586 |
| TCGA-EJ-8468 | 164.2736 | 345.3649 | 509.6384 | 0.777701 |
| TCGA-G9-7510 | -98.1399 | -54.8702 | -153.01  | 0.835075 |
| TCGA-EJ-5522 | -439.508 | -24.1621 | -463.67  | 0.859285 |
| TCGA-EJ-A46H | 86.66863 | 415.293  | 501.9616 | 0.778409 |
| TCGA-HC-7230 | -1262.98 | -893.243 | -2156.23 | 0.958678 |
| TCGA-KK-A8IF | -950.925 | -937.141 | -1888.07 | 0.94674  |
| TCGA-HC-7737 | -10.6869 | 510.894  | 500.2071 | 0.77857  |

|              |          |          |          |          |
|--------------|----------|----------|----------|----------|
| TCGA-EJ-8474 | -253.088 | -458.511 | -711.599 | 0.877327 |
| TCGA-G9-6370 | -324.237 | -126.386 | -450.623 | 0.858304 |
| TCGA-HC-7744 | -1095.9  | -790.393 | -1886.29 | 0.946656 |
| TCGA-EJ-5527 | 43.44897 | 129.4965 | 172.9455 | 0.807807 |
| TCGA-EJ-5509 | -180.462 | 390.5378 | 210.0759 | 0.804583 |
| TCGA-TP-A8TV | -1128.93 | -899.914 | -2028.84 | 0.953191 |
| TCGA-G9-6364 | -123.666 | -530.704 | -654.37  | 0.873265 |
| TCGA-G9-A9S7 | -1360.39 | -495.443 | -1855.83 | 0.945206 |
| TCGA-CH-5767 | -915.409 | -841.629 | -1757.04 | 0.940372 |
| TCGA-EJ-5502 | -391.004 | 230.4506 | -160.554 | 0.835684 |
| TCGA-V1-A8WL | -424.239 | 295.8255 | -128.413 | 0.833083 |
| TCGA-CH-5791 | -597.718 | -313.266 | -910.984 | 0.890995 |
| TCGA-FC-A66V | -858.991 | -36.6675 | -895.658 | 0.889971 |
| TCGA-EJ-5497 | -500.087 | -234.355 | -734.442 | 0.878931 |
| TCGA-HC-7078 | -528.631 | -14.8158 | -543.447 | 0.865216 |
| TCGA-KK-A7AQ | -491.99  | -334.082 | -826.072 | 0.885267 |
| TCGA-G9-6332 | -1316.66 | -930.309 | -2246.97 | 0.962382 |
| TCGA-CH-5740 | -854.275 | -264.437 | -1118.71 | 0.904422 |
| TCGA-G9-6338 | -205.782 | -440.907 | -646.689 | 0.872715 |
| TCGA-EJ-5496 | -1266.12 | -791.693 | -2057.82 | 0.954468 |
| TCGA-KK-A59Z | 165.8213 | 37.56932 | 203.3906 | 0.805165 |
| TCGA-J4-A83M | -835.576 | -285.64  | -1121.22 | 0.904579 |
| TCGA-XK-AAJR | -513.191 | -552.966 | -1066.16 | 0.901104 |
| TCGA-KK-A6E2 | -1168.55 | -532.419 | -1700.97 | 0.93754  |
| TCGA-VN-A88L | -326.818 | -684.691 | -1011.51 | 0.897597 |
| TCGA-G9-7522 | -404.052 | -253.725 | -657.777 | 0.873508 |
| TCGA-EJ-5516 | 238.4179 | 187.9474 | 426.3653 | 0.785327 |
| TCGA-G9-6363 | -478.376 | -169.923 | -648.299 | 0.87283  |
| TCGA-QU-A6IP | -827.574 | -577.998 | -1405.57 | 0.92158  |
| TCGA-J4-A67R | -470.042 | 522.2483 | 52.20659 | 0.818127 |
| TCGA-EJ-7784 | -996.316 | -572.426 | -1568.74 | 0.930612 |
| TCGA-CH-5794 | -1123.11 | -590.107 | -1713.22 | 0.938165 |
| TCGA-HC-A8D1 | -247.154 | -33.856  | -281.01  | 0.845264 |
| TCGA-HC-A76W | -27.798  | -121.011 | -148.809 | 0.834736 |
| TCGA-KK-A8I5 | -489.28  | -546.721 | -1036    | 0.899176 |
| TCGA-J4-AAU2 | -798.852 | -434.392 | -1233.24 | 0.911467 |
| TCGA-CH-5739 | -35.177  | 80.75691 | 45.57989 | 0.818686 |
| TCGA-CH-5762 | -308.602 | 304.3937 | -4.20853 | 0.822861 |
| TCGA-CH-5752 | -506.991 | -784.822 | -1291.81 | 0.914969 |
| TCGA-HC-A8D0 | -264.762 | 205.2909 | -59.4714 | 0.827443 |
| TCGA-EJ-5515 | -673.702 | -643.194 | -1316.9  | 0.916449 |
| TCGA-J4-8200 | -330.938 | -433.097 | -764.035 | 0.880995 |
| TCGA-EJ-5517 | -358.117 | 102.5553 | -255.562 | 0.843262 |

|              |          |          |          |          |
|--------------|----------|----------|----------|----------|
| TCGA-TP-A8TT | -164.259 | 878.0789 | 713.8199 | 0.758513 |
| TCGA-VP-A87E | 42.31693 | 866.7521 | 909.069  | 0.739528 |
| TCGA-EJ-7331 | 29.88053 | 14.69873 | 44.57926 | 0.81877  |
| TCGA-G9-6339 | -968.153 | -412.129 | -1380.28 | 0.920132 |
| TCGA-EJ-5505 | -1129.83 | -670.282 | -1800.12 | 0.942504 |
| TCGA-CH-5768 | -1110.67 | -619.797 | -1730.47 | 0.939038 |
| TCGA-CH-5789 | -562.14  | -32.7285 | -594.868 | 0.868976 |
| TCGA-VN-A88P | -233.898 | -254.898 | -488.796 | 0.861166 |
| TCGA-EJ-7794 | -227.951 | 96.94341 | -131.008 | 0.833294 |
| TCGA-Y6-A8TL | -651.237 | -664.689 | -1315.93 | 0.916392 |
| TCGA-EJ-5511 | -518.191 | -752.631 | -1270.82 | 0.913722 |
| TCGA-KC-A7FE | 29.0553  | -227.909 | -198.853 | 0.838758 |
| TCGA-EJ-5499 | -589.764 | 147.3465 | -442.417 | 0.857685 |
| TCGA-EJ-A8FS | -1426.04 | -775.629 | -2201.67 | 0.960554 |
| TCGA-J4-A67M | -93.548  | 753.3234 | 659.7754 | 0.763659 |
| TCGA-CH-5744 | -868.189 | -249.409 | -1117.6  | 0.904352 |
| TCGA-XK-AAJA | -1137.96 | -642.598 | -1780.56 | 0.941541 |
| TCGA-HC-8258 | -924.061 | -157.559 | -1081.62 | 0.902086 |
| TCGA-EJ-7783 | -534.363 | -239.466 | -773.829 | 0.881674 |
| TCGA-G9-7525 | -285.851 | -461.831 | -747.682 | 0.879857 |
| TCGA-EJ-A7NF | -1449.35 | -742.86  | -2192.21 | 0.960167 |
| TCGA-EJ-A46I | -873.349 | -578.281 | -1451.63 | 0.924183 |
| TCGA-J4-A67S | -1042.32 | 34.03379 | -1008.29 | 0.897388 |
| TCGA-J4-AATV | -414.197 | 221.2137 | -192.983 | 0.838289 |
| TCGA-EJ-7786 | -463.729 | -531.096 | -994.825 | 0.896514 |
| TCGA-KC-A7FA | -681.824 | -218.643 | -900.467 | 0.890293 |
| TCGA-EJ-7115 | -317.455 | -468.905 | -786.36  | 0.88254  |
| TCGA-VP-A875 | -1328.58 | -1189.14 | -2517.72 | 0.972418 |
| TCGA-EJ-5542 | -243.566 | -427.758 | -671.324 | 0.874475 |
| TCGA-KK-A8I9 | -63.6453 | 409.6281 | 345.9828 | 0.792577 |
| TCGA-CH-5745 | -248.241 | 294.5147 | 46.2735  | 0.818627 |
| TCGA-G9-6377 | -660.693 | -102.755 | -763.448 | 0.880954 |
| TCGA-KK-A7B1 | -130.15  | -405.108 | -535.258 | 0.864613 |
| TCGA-XK-AAJ3 | -475.806 | -715.781 | -1191.59 | 0.908934 |
| TCGA-VP-A87J | -864.736 | -740.693 | -1605.43 | 0.93257  |
| TCGA-CH-5790 | -1077.92 | -421.609 | -1499.53 | 0.926846 |
| TCGA-VN-A88O | -890.906 | -182.484 | -1073.39 | 0.901564 |
| TCGA-V1-A9OX | -673.83  | 65.78081 | -608.049 | 0.869932 |
| TCGA-HC-7212 | -541.107 | -640.05  | -1181.16 | 0.908295 |
| TCGA-EJ-5531 | -307.639 | 411.2104 | 103.5716 | 0.813768 |
| TCGA-V1-A8X3 | -457.34  | -464.052 | -921.392 | 0.891687 |
| TCGA-HC-8265 | -722.799 | -173.087 | -895.886 | 0.889986 |
| TCGA-EJ-5512 | -893.804 | -673.594 | -1567.4  | 0.93054  |

|              |          |          |          |          |
|--------------|----------|----------|----------|----------|
| TCGA-V1-A8MF | -243.85  | 509.9005 | 266.0503 | 0.799676 |
| TCGA-G9-6333 | -455.719 | -191.257 | -646.975 | 0.872735 |
| TCGA-EJ-7327 | 63.62152 | -321.117 | -257.496 | 0.843414 |
| TCGA-EJ-7218 | -971.767 | -469.078 | -1440.84 | 0.923577 |
| TCGA-KK-A8IH | -929.22  | -23.0246 | -952.245 | 0.893728 |
| TCGA-KK-A8IM | -416.234 | -82.4621 | -498.696 | 0.861904 |
| TCGA-KK-A7AY | -894.268 | -422.359 | -1316.63 | 0.916433 |
| TCGA-G9-6496 | -387.881 | -520.066 | -907.947 | 0.890792 |
| TCGA-KC-A7FD | -1526.01 | -722.66  | -2248.67 | 0.96245  |
| TCGA-HC-7748 | 12.49442 | 13.38872 | 25.88314 | 0.820343 |
| TCGA-EJ-5532 | -488.733 | -589.556 | -1078.29 | 0.901875 |
| TCGA-HC-7752 | -765.134 | -364.914 | -1130.05 | 0.905131 |
| TCGA-CH-5771 | 303.745  | 614.0178 | 917.7628 | 0.738668 |
| TCGA-EJ-7312 | -890.892 | -524.03  | -1414.92 | 0.922112 |
| TCGA-FC-A800 | -973.133 | -915.275 | -1888.41 | 0.946756 |
| TCGA-EJ-7321 | -907.166 | -3.32055 | -910.487 | 0.890961 |
| TCGA-HC-7080 | -1168.71 | -738.124 | -1906.83 | 0.947623 |
| TCGA-G9-6494 | -512.895 | -700.909 | -1213.8  | 0.910289 |
| TCGA-EJ-5530 | -473.18  | -684.254 | -1157.43 | 0.906832 |
| TCGA-2A-AAYU | -884.522 | -930.915 | -1815.44 | 0.943253 |
| TCGA-V1-A8MM | -103.711 | 305.6675 | 201.9562 | 0.80529  |
| TCGA-HC-7079 | 609.7865 | 3013.203 | 3622.99  | 0.4205   |
| TCGA-EJ-AB20 | 363.9109 | 509.7001 | 873.611  | 0.743021 |
| TCGA-HC-7818 | -678.046 | -48.3999 | -726.446 | 0.878371 |
| TCGA-VP-A87B | -670.511 | -523.647 | -1194.16 | 0.909091 |
| TCGA-V1-A9ZK | -538.006 | -453.305 | -991.31  | 0.896286 |
| TCGA-HC-8257 | -610.551 | -325.494 | -936.044 | 0.892659 |
| TCGA-HC-7209 | -796.057 | -358.964 | -1155.02 | 0.906683 |
| TCGA-V1-A9O9 | -274.946 | 1224.201 | 949.2552 | 0.735544 |
| TCGA-EJ-A46B | -951.24  | -834.374 | -1785.61 | 0.94179  |
| TCGA-VN-A88N | -1107.56 | -743.424 | -1850.98 | 0.944973 |
| TCGA-HC-7749 | -343.466 | -229.022 | -572.488 | 0.867345 |
| TCGA-CH-5764 | -708.846 | -213.772 | -922.618 | 0.891769 |
| TCGA-EJ-5521 | -643.83  | -173.828 | -817.659 | 0.884692 |
| TCGA-KC-A7F5 | -1393.48 | -1323.73 | -2717.21 | 0.97883  |
| TCGA-HC-7736 | -328.308 | -66.1508 | -394.459 | 0.854044 |
| TCGA-EJ-A46D | -853.177 | -469.828 | -1323.01 | 0.916808 |
| TCGA-EJ-A7NN | -478.919 | 138.9296 | -339.989 | 0.849858 |
| TCGA-EJ-A6RA | -830.585 | -240.752 | -1071.34 | 0.901433 |
| TCGA-HI-7168 | 111.623  | -703.039 | -591.416 | 0.868725 |
| TCGA-V1-A9O7 | 189.0522 | 113.215  | 302.2672 | 0.796473 |
| TCGA-V1-A9OA | -28.8096 | -154.854 | -183.664 | 0.837542 |
| TCGA-KK-A8IJ | -857.301 | -713.399 | -1570.7  | 0.930718 |



|              |          |          |          |          |
|--------------|----------|----------|----------|----------|
| TCGA-ZG-A9L1 | -411.759 | -1117.71 | -1529.47 | 0.928487 |
| TCGA-KK-A7AW | -790.743 | 728.4756 | -62.2679 | 0.827673 |
| TCGA-X4-A8KQ | -159.986 | 4.579331 | -155.407 | 0.835269 |
| TCGA-HI-7171 | -631.959 | -473.448 | -1105.41 | 0.903587 |
| TCGA-CH-5769 | -516.159 | -248.283 | -764.442 | 0.881023 |
| TCGA-ZG-A9MC | 294.2652 | 1818.975 | 2113.24  | 0.609643 |
| TCGA-YL-A9WL | -958.817 | -1001.96 | -1960.77 | 0.950122 |
| TCGA-ZG-A9ND | -1126.79 | -637.264 | -1764.06 | 0.940722 |
| TCGA-V1-A8WV | -450.235 | 375.2891 | -74.9463 | 0.828716 |
| TCGA-KK-A59Y | -1202.66 | -695.985 | -1898.64 | 0.947239 |
| TCGA-ZG-A9N3 | -1013.41 | 451.7637 | -561.643 | 0.866552 |
| TCGA-J4-AATZ | -1170.34 | -682.806 | -1853.15 | 0.945077 |
| TCGA-ZG-A9LZ | -535.999 | 96.67161 | -439.328 | 0.857452 |
| TCGA-EJ-5507 | -522.297 | -2.45506 | -524.753 | 0.863837 |
| TCGA-XK-AAIV | 223.2745 | 1488.146 | 1711.421 | 0.65531  |
| TCGA-EJ-5518 | 209.1274 | -191.63  | 17.4977  | 0.821046 |
| TCGA-J9-A52E | 417.9517 | 231.9451 | 649.8968 | 0.764594 |
| TCGA-KK-A8I7 | -84.6253 | 299.913  | 215.2876 | 0.804128 |
| TCGA-VP-A87H | -760.316 | -488.145 | -1248.46 | 0.912383 |
| TCGA-YL-A9WX | -398.578 | 235.239  | -163.339 | 0.835908 |
| TCGA-V1-A9Z7 | 372.646  | 132.8969 | 505.5429 | 0.778079 |
| TCGA-ZG-A9LM | -85.181  | -11.7191 | -96.9001 | 0.830516 |
| TCGA-KK-A6E8 | -1037.9  | -839.724 | -1877.62 | 0.946245 |
| TCGA-YL-A8SJ | 58.11583 | -729.445 | -671.329 | 0.874475 |
| TCGA-CH-5766 | -972.874 | -65.3754 | -1038.25 | 0.89932  |
| TCGA-MG-AAMC | -1251.49 | -735.083 | -1986.57 | 0.951296 |
| TCGA-YL-A8HM | -563.704 | 428.3018 | -135.402 | 0.83365  |
| TCGA-KK-A5A1 | -130.755 | 7.540743 | -123.214 | 0.832661 |
| TCGA-YL-A9WJ | -170.593 | 203.5399 | 32.94697 | 0.819749 |
| TCGA-KK-A8I8 | -797.556 | -450.745 | -1248.3  | 0.912374 |
| TCGA-KK-A8IC | -44.338  | 34.33792 | -10      | 0.823343 |
| TCGA-KK-A7B2 | -50.0052 | 1071.798 | 1021.793 | 0.728289 |
| TCGA-YL-A9WI | -717.255 | -730.335 | -1447.59 | 0.923957 |
| TCGA-EJ-8469 | -770.723 | -603.305 | -1374.03 | 0.919773 |
| TCGA-FC-A5OB | -1165.01 | -1011.15 | -2176.15 | 0.959506 |
| TCGA-V1-A9ZI | 16.48266 | 232.3742 | 248.8568 | 0.801189 |
| TCGA-YL-A8SQ | -464.403 | -183.992 | -648.396 | 0.872837 |
| TCGA-CH-5741 | -1280.85 | -864.663 | -2145.52 | 0.958229 |
| TCGA-ZG-A9LB | -333.571 | 371.3482 | 37.77696 | 0.819343 |
| TCGA-YL-A9WH | -798.966 | -563.447 | -1362.41 | 0.919102 |
| TCGA-2A-A8VT | -984.114 | -551.621 | -1535.74 | 0.928828 |
| TCGA-KK-A7B3 | -72.8797 | 473.2738 | 400.3941 | 0.787681 |
| TCGA-G9-6499 | -1049.69 | -291.811 | -1341.5  | 0.917888 |

|              |          |          |          |          |
|--------------|----------|----------|----------|----------|
| TCGA-YL-A8HL | -1072.73 | -1044.01 | -2116.74 | 0.957013 |
| TCGA-ZG-A9LY | -272.769 | -4.50468 | -277.274 | 0.84497  |
| TCGA-CH-5751 | 126.565  | 1667.054 | 1793.619 | 0.646148 |
| TCGA-KK-A8IA | -975.477 | -791.685 | -1767.16 | 0.940876 |
| TCGA-V1-A9ZG | -122.958 | -236.958 | -359.917 | 0.851396 |
| TCGA-EJ-A65F | -204.53  | -156.581 | -361.111 | 0.851488 |
| TCGA-VP-A878 | -184.708 | 10.46158 | -174.247 | 0.836786 |
| TCGA-2A-A8W3 | -675.956 | -541.137 | -1217.09 | 0.910489 |
| TCGA-HC-A8CY | -885.825 | 223.0378 | -662.787 | 0.873866 |
| TCGA-ZG-A9L6 | 173.6327 | 147.5899 | 321.2226 | 0.794788 |
| TCGA-ZG-A8QZ | 2.620654 | 308.4008 | 311.0214 | 0.795695 |
| TCGA-HC-A9TE | 132.8602 | 1014.122 | 1146.982 | 0.715574 |
| TCGA-G9-7521 | -8.38238 | 741.3864 | 733.004  | 0.756675 |
| TCGA-YL-A9WK | 94.10289 | 140.8383 | 234.9412 | 0.80241  |
| TCGA-YL-A8SI | -109.942 | 32.3944  | -77.5478 | 0.82893  |
| TCGA-G9-A9S0 | -867.014 | 21.73835 | -845.276 | 0.886574 |
| TCGA-EJ-5506 | -963.392 | -499.633 | -1463.02 | 0.924821 |
| TCGA-KK-A7B0 | -233.056 | 1050.009 | 816.9534 | 0.748561 |
| TCGA-KK-A7AU | -1810.53 | -1132.44 | -2942.97 | 0.985074 |
| TCGA-HC-7821 | 323.8894 | 376.2993 | 700.1887 | 0.759816 |
| TCGA-V1-A9Z9 | -262.427 | -374.169 | -636.596 | 0.871991 |
| TCGA-V1-A9OY | -452.325 | -12.7916 | -465.117 | 0.859394 |
| TCGA-EJ-5514 | 136.2114 | 228.6841 | 364.8955 | 0.790881 |
| TCGA-EJ-5519 | -535.088 | -590.941 | -1126.03 | 0.90488  |
| TCGA-CH-5761 | -221.268 | -553.137 | -774.405 | 0.881714 |
| TCGA-J9-A52B | -410.783 | -67.7338 | -478.517 | 0.860398 |
| TCGA-VN-A88K | -250.553 | -430.683 | -681.236 | 0.875179 |
| TCGA-HC-7213 | -437.301 | -37.0515 | -474.353 | 0.860086 |
| TCGA-EJ-5495 | 300.2322 | 339.6244 | 639.8566 | 0.765543 |
| TCGA-KC-A4BR | -35.7771 | -287.658 | -323.435 | 0.848575 |
| TCGA-KK-A8IL | -399.126 | 795.3983 | 396.2719 | 0.788054 |
| TCGA-KK-A7B4 | -521.874 | 3.090221 | -518.784 | 0.863395 |
| TCGA-G9-6356 | -208.621 | 325.5268 | 116.9057 | 0.812629 |
| TCGA-ZG-A9M4 | -694.415 | 841.383  | 146.9678 | 0.810049 |
| TCGA-G9-6367 | -604.466 | -394.021 | -998.487 | 0.896752 |
| TCGA-CH-5753 | -1065.35 | -215.396 | -1280.75 | 0.914313 |
| TCGA-XK-AAIW | -1308.02 | 92.92525 | -1215.09 | 0.910367 |
| TCGA-V1-A9Z8 | 119.7725 | 98.52777 | 218.3002 | 0.803865 |
| TCGA-G9-A9S4 | -1325.09 | -898.829 | -2223.92 | 0.961458 |
| TCGA-YL-A8SB | -27.4132 | -159.413 | -186.826 | 0.837796 |
| TCGA-V1-A9O5 | -502.42  | 699.3811 | 196.9608 | 0.805724 |
| TCGA-YL-A8HK | -191.767 | -70.6606 | -262.427 | 0.843803 |
| TCGA-EJ-A65J | -564.289 | -440.039 | -1004.33 | 0.897132 |

|              |          |          |          |          |
|--------------|----------|----------|----------|----------|
| TCGA-XQ-A8TB | -95.51   | -501.953 | -597.463 | 0.869164 |
| TCGA-CH-5788 | -908.11  | -737.799 | -1645.91 | 0.934698 |
| TCGA-V1-A9OL | -513.219 | 9.30917  | -503.91  | 0.862291 |
| TCGA-KK-A6E7 | -932.665 | -605.561 | -1538.23 | 0.928964 |
| TCGA-VP-AA1N | -204.536 | 230.6854 | 26.14966 | 0.82032  |
| TCGA-YL-A8S9 | -1543.39 | -1281.12 | -2824.5  | 0.981932 |
| TCGA-VP-A87D | -1159.76 | -984.941 | -2144.7  | 0.958195 |
| TCGA-KK-A8ID | -1247.63 | -671.34  | -1918.97 | 0.948191 |
| TCGA-VP-A879 | -609.341 | -856.985 | -1466.33 | 0.925005 |
| TCGA-KC-A4BV | -8.77689 | 88.28375 | 79.50686 | 0.815816 |
| TCGA-EJ-5526 | -116.03  | -82.8376 | -198.867 | 0.838759 |
| TCGA-KK-A6E6 | -185.747 | -105.29  | -291.037 | 0.846049 |
| TCGA-YL-A8SC | -362.898 | 269.5427 | -93.3558 | 0.830226 |
| TCGA-YL-A8SK | -392.397 | -18.743  | -411.14  | 0.855316 |
| TCGA-HC-A9TH | -122.229 | 41.73185 | -80.4974 | 0.829172 |
| TCGA-ZG-A9L2 | 616.2952 | 745.8949 | 1362.19  | 0.693154 |
| TCGA-EJ-5524 | 150.6974 | 217.3615 | 368.0589 | 0.790596 |
| TCGA-EJ-A65B | -266.644 | -139.133 | -405.777 | 0.854907 |
| TCGA-ZG-A9L4 | 229.5499 | 6.052289 | 235.6022 | 0.802352 |
| TCGA-YL-A9WY | 366.2278 | 1172.915 | 1539.143 | 0.6742   |
| TCGA-ZG-A9LU | -776.405 | 417.0171 | -359.388 | 0.851355 |
| TCGA-V1-A8WW | -546.086 | -216.108 | -762.194 | 0.880867 |
| TCGA-ZG-A9NI | 183.923  | -306.352 | -122.429 | 0.832597 |
| TCGA-KK-A59V | -300.598 | 2169.161 | 1868.563 | 0.637713 |
| TCGA-ZG-A9LS | 507.2379 | 1149.801 | 1657.039 | 0.661318 |
| TCGA-CH-5772 | -463.46  | -312.047 | -775.507 | 0.88179  |
| TCGA-YL-A8S8 | -307.824 | -558.718 | -866.542 | 0.888014 |
| TCGA-CH-5754 | -217.37  | 724.1154 | 506.7453 | 0.777968 |
| TCGA-M7-A723 | -21.513  | 803.6423 | 782.1294 | 0.751941 |
| TCGA-J9-A8CM | 154.7002 | -50.0273 | 104.6729 | 0.813674 |
| TCGA-YL-A8SR | -522.119 | -587.241 | -1109.36 | 0.903836 |
| TCGA-YL-A8SL | -1278.71 | -955.839 | -2234.54 | 0.961885 |
| TCGA-EJ-A46F | -1361.12 | -871.469 | -2232.59 | 0.961807 |
| TCGA-EJ-5504 | 67.94905 | -301.129 | -233.18  | 0.841491 |
| TCGA-ZG-A9LN | 315.3209 | 1689.52  | 2004.841 | 0.622178 |
| TCGA-EJ-5525 | 405.4222 | -470.714 | -65.2922 | 0.827923 |
| TCGA-KK-A8IK | -1414.26 | -857     | -2271.26 | 0.963345 |
| TCGA-G9-7523 | 1047.437 | 783.2521 | 1830.689 | 0.641986 |
| TCGA-KK-A6E0 | -1077.65 | -608.816 | -1686.47 | 0.936798 |
| TCGA-KK-A8I4 | 436.5492 | 1186.119 | 1622.669 | 0.665094 |
| TCGA-CH-5792 | 196.9577 | 770.8947 | 967.8524 | 0.733692 |
| TCGA-KK-A6E1 | -1136.02 | -613.302 | -1749.32 | 0.939986 |
